# Supplementary material
Source: ML conference proceedings conference paper supplement (https://openreview.net/forum?id=D5Z2E8CNsD)
Supplement: supplementary_material [file attachment]

## Sheet: combined_robustness_metrics_ext
name	updated_name	dataset	image_size	image_size_rat	image_size_cat	param_count	size	architecture	technique	dataset-size	in1000-val	in1000-v2	in1000-s	in1000-r	in1000-a	in1000 Avg. Rob.	in1000 Eff. Rob.	in100-val	in100-V2	in100-s	in100-r	in100-a	in100 Avg. Rob.	in100 Eff. Rob.	in100-Dogs-Val	in100-Dogs-V2	in100-Dogs-S	in100-Dogs-R	in100-Dogs-A	in100-Dogs-Avg. Rob.	in100-Dogs-Eff. Rob.
adv_inception_v3	adv_inception_v3	in1k	299	0.37375	M	23.83	S	Convolution	Conventional	1200000	0.793	0.677	0.281	0.401	0.11	0.367	0.463	0.8884	0.796	0.412158	0.40628	0.152405	0.442	0.498	0.703	0.544	0.365354	0.618133	0.352273	0.47	0.669
bat_resnext26ts	bat_resnext26ts	in1k	256	0.32	M	10.73	S	Convolution	Conventional	1200000	0.784	0.669	0.268	0.392	0.089	0.355	0.453	0.9478	0.883	0.444816	0.417063	0.267333	0.503	0.531	0.8122	0.615	0.372244	0.605455	0.488636	0.52	0.64
beit_base_patch16_224	beit_base_patch16_224.in22k_ft_in22k_in1k	in21k	224	0.28	S	86.53	M	ViT	Conventional	14200000	0.851	0.754	0.411	0.54	0.507	0.553	0.65	0.98	0.94	0.731	0.637	0.677	0.746	0.761	0.8516	0.708	0.488	0.753	0.693	0.661	0.776
beit_base_patch16_384	beit_base_patch16_384.in22k_ft_in22k_in1k	in21k	384	0.48	M	86.74	M	ViT	Conventional	14200000	0.866	0.77	0.504	0.66	0.659	0.648	0.748	0.982	0.948	0.753	0.662	0.802	0.791	0.805	0.868	0.742	0.499	0.769	0.886	0.724	0.834
beit_large_patch16_512	beit_large_patch16_512.in22k_ft_in22k_in1k	in21k	512	0.64	L	305.67	L	ViT	Conventional	14200000	0.884	0.799	0.577	0.788	0.817	0.745	0.843	0.986	0.958	0.815	0.755	0.915	0.861	0.873	0.893	0.781	0.578	0.846	0.932	0.784	0.878
botnet26t_256	botnet26t_256	in1k	256	0.32	M	12.49	S	ViT	Conventional	1200000	0.794	0.68	0.284	0.405	0.116	0.371	0.467	0.9526	0.895	0.423175	0.409768	0.297314	0.506	0.531	0.8182	0.634	0.368898	0.584326	0.522727	0.527	0.644
cait_m36_384	cait_m36_384	in1k	384	0.48	M	271.22	L	ViT	Conventional	1200000	0.858	0.761	0.456	0.591	0.578	0.597	0.696	0.979	0.944	0.638403	0.590232	0.721424	0.724	0.74	0.88	0.759	0.528543	0.792163	0.897727	0.744	0.845
cait_m48_448	cait_m48_448	in1k	448	0.56	L	356.46	L	ViT	Conventional	1200000	0.863	0.768	0.488	0.641	0.623	0.63	0.73	0.9808	0.946	0.638796	0.575484	0.773891	0.734	0.748	0.882	0.761	0.541142	0.808298	0.886364	0.749	0.849
cait_s24_224	cait_s24_224	in1k	224	0.28	S	46.92	S	ViT	Conventional	1200000	0.828	0.723	0.344	0.469	0.312	0.462	0.558	0.9706	0.927	0.568168	0.510308	0.516552	0.631	0.65	0.8476	0.705	0.487402	0.73569	0.647727	0.644	0.76
cait_s24_384	cait_s24_384	in1k	384	0.48	M	47.06	S	ViT	Conventional	1200000	0.851	0.752	0.41	0.536	0.497	0.549	0.645	0.9748	0.94	0.57289	0.518395	0.668332	0.675	0.692	0.872	0.737	0.494882	0.747983	0.840909	0.705	0.808
cait_s36_384	cait_s36_384	in1k	384	0.48	M	68.37	M	ViT	Conventional	1200000	0.854	0.758	0.435	0.575	0.544	0.578	0.677	0.9764	0.938	0.602203	0.539962	0.693317	0.693	0.71	0.8716	0.744	0.51437	0.76335	0.863636	0.721	0.827
cait_xs24_384	cait_xs24_384	in1k	384	0.48	M	26.67	S	ViT	Conventional	1200000	0.844	0.742	0.385	0.518	0.439	0.521	0.617	0.9744	0.934	0.568168	0.50222	0.61649	0.655	0.672	0.8594	0.723	0.481102	0.731848	0.795455	0.683	0.795
cait_xxs24_224	cait_xxs24_224	in1k	224	0.28	S	11.96	S	ViT	Conventional	1200000	0.803	0.691	0.297	0.417	0.152	0.389	0.484	0.9516	0.882	0.490458	0.437203	0.337914	0.537	0.564	0.804	0.663	0.394488	0.663465	0.625	0.586	0.729
cait_xxs24_384	cait_xxs24_384	in1k	384	0.48	M	12.03	S	ViT	Conventional	1200000	0.827	0.722	0.34	0.464	0.3	0.457	0.553	0.9628	0.907	0.472162	0.436093	0.498438	0.578	0.6	0.8274	0.683	0.405709	0.665002	0.75	0.626	0.757
cait_xxs36_224	cait_xxs36_224	in1k	224	0.28	S	17.3	S	ViT	Conventional	1200000	0.809	0.7	0.307	0.43	0.183	0.405	0.501	0.9562	0.896	0.51446	0.451633	0.37664	0.56	0.586	0.8138	0.657	0.420079	0.67307	0.625	0.594	0.73
cait_xxs36_384	cait_xxs36_384	in1k	384	0.48	M	17.37	S	ViT	Conventional	1200000	0.836	0.732	0.359	0.486	0.363	0.485	0.58	0.9674	0.918	0.522723	0.456866	0.547158	0.611	0.632	0.8374	0.702	0.448031	0.679985	0.738636	0.642	0.767
CLIP-RN101-yfcc15m	CLIP-RN101-yfcc15m	yfcc15m	224	0.28	S	0	M	Convolution	VL	15000000	0.3393	0.2926	0.0883492	0.2631	0.161733	0.201	0.592	0.758	0.707	0.293331	0.428481	0.336665	0.441	0.582	0.088	0.077	0.0393701	0.21821	0.5	0.209	2.375
CLIP-RN50-cc12m	CLIP-RN50-cc12m	cc12m	224	0.28	S	88.56	M	Convolution	VL	12000000	0.245	0.2282	0.1856	0.3803	0.0621	0.214	0.873	0.605	0.587	0.501082	0.571361	0.183635	0.461	0.762	0.1086	0.101	0.0891732	0.379562	0.363636	0.233	2.145
CLIP-RN50-cc12m+in1k	CLIP-RN50-cc12m+in1k	cc12m+in1k	224	0.28	S	88.56	M	Convolution	VL	13200000	0.4098	0.3579	0.2357	0.392	0.0695	0.264	0.644	0.7942	0.737	0.537281	0.547732	0.217989	0.51	0.642	0.315	0.288	0.17815	0.436035	0.522727	0.356	1.13
CLIP-RN50-in1k	CLIP-RN50-in1k	in1k	224	0.28	S	88.56	M	Convolution	VL	1200000	0.677	0.553	0.192	0.311	0.035	0.273	0.403	0.837	0.76	0.34	0.337	0.161	0.4	0.478	0.697	0.516	0.255	0.507	0.477	0.439	0.63
CLIP-RN50-laion15m	CLIP-RN50-laion15m	laion15m	224	0.28	S	88.56	M	Convolution	VL	15000000	0.351	0.294	0.241	0.425	0.065	0.256	0.729	0.7412	0.693	0.58253	0.611481	0.204872	0.523	0.706	0.1582	0.123	0.116732	0.388782	0.454545	0.271	1.713
CLIP-RN50-laion15m+cc12m	CLIP-RN50-laion15m+cc12m	laion+cc12m	224	0.28	S	88.56	M	Convolution	VL	27000000	0.3809	0.3296	0.2734	0.4805	0.0932	0.294	0.772	0.7726	0.72	0.6325	0.673644	0.267333	0.573	0.742	0.1728	0.143	0.12874	0.46408	0.465909	0.3	1.736
CLIP-RN50-laion50m	CLIP-RN50-laion50m	laion50m	224	0.28	S	88.56	M	Convolution	VL	50000000	0.42	0.355	0.296	0.5	0.095	0.312	0.743	0.806	0.765	0.64	0.684	0.685	0.694	0.861	0.211	0.155	0.149	0.425	0.477	0.302	1.431
CLIP-RN50-WIT-400m	CLIP-RN50-WIT-400m	wit	224	0.28	S	88.56	M	Convolution	VL	400000000	0.59854	0.5284	0.355	0.6072	0.232	0.497	0.83	0.8998	0.868	0.712375	0.764351	0.481574	0.707	0.786	0.5298	0.435	0.287598	0.628506	0.579545	0.483	0.912
CLIP-RN50-yfcc10m-no-imagenet-classnames	CLIP-RN50-yfcc10m-no-imagenet-classnames	yfcc15m	224	0.28	S	88.56	M	Convolution	VL	15000000	0.127	0.118	0.023	0.071	0.065	0.069	0.543	0.3288	0.293	0.103876	0.14399	0.155528	0.174	0.529	0.0344	0.033	0.0214567	0.0964272	0.329545	0.12	3.488
CLIP-RN50-yfcc15m	CLIP-RN50-yfcc15m	yfcc15m	224	0.28	S	88.56	M	Convolution	VL	15000000	0.324	0.28	0.073	0.223	0.136	0.178	0.549	0.741	0.693	0.582	0.611	0.205	0.523	0.706	0.0864	0.078	0.0324803	0.200154	0.318182	0.157	1.817
CLIP-RN50-yfcc2m	CLIP-RN50-yfcc2m	yfcc15m	224	0.28	S	88.56	M	Convolution	VL	15000000	0.119	0.1	0.01	0.066	0.041	0.054	0.454	0.4126	0.388	0.0729884	0.144783	0.132417	0.185	0.448	0.0218	0.019	0.0177165	0.0829812	0.238636	0.09	4.128
CLIP-RN50-yfcc4m	CLIP-RN50-yfcc4m	yfcc15m	224	0.28	S	88.56	M	Convolution	VL	15000000	0.191	0.165	0.026	0.11	0.06	0.09	0.471	0.5646	0.557	0.171749	0.273866	0.194254	0.299	0.53	0.0276	0.034	0.0163386	0.105647	0.306818	0.116	4.203
CLIP-RN50x64-wit-400m	CLIP-RN50x64-wit-400m	wit	224	0.28	S	0	L	Convolution	VL	400000000	0.73872	0.6709	0.558569	0.844133	0.7064	0.695	0.941	0.9618	0.936	0.879205	0.923406	0.839475	0.895	0.931	0.6748	0.588	0.444685	0.801383	0.818182	0.663	0.983
CLIP-swin_base_patch4_window7-laion150m-LiT	CLIP-swin_base_patch4_window7-laion150m-LiT	laion150m+in1k	224	0.28	S	150.77	M	ViT	LiT	151200000	0.736	0.414	0.633	0.45	0.647	0.536	0.728
CLIP-swin_base_patch4_window7-laion15m-LiT	CLIP-swin_base_patch4_window7-laion15m-LiT	laion15m+in1k	224	0.28	S	150.77	M	ViT	LiT	16200000	0.653	0.346	0.59	0.391	0.566	0.473	0.724
CLIP-swin_base_patch4_window7-laion400m-LiT	CLIP-swin_base_patch4_window7-laion400m-LiT	laion400m+in1k	224	0.28	S	150.77	M	ViT	LiT	401200000	0.755	0.413	0.639	0.465	0.668	0.546	0.723
CLIP-swin_base_patch4_window7-yfcc15m	CLIP-swin_base_patch4_window7-yfcc15m	yfcc15m	224	0.28	S	150.77	M	ViT	VL	15000000	0.335	0.297	0.072	0.236	0.187	0.198	0.591	0.773	0.72	0.281	0.424	0.408	0.458	0.592	0.062	0.063	0.028937	0.144449	0.397727	0.159	2.565
CLIP-ViT-B-32-WIT-400m	CLIP-ViT-B-32-WIT-400m	wit	224	0.28	S	151.22	L	ViT	VL	400000000	0.634	0.563	0.423	0.694	0.316	0.499	0.787	0.9302	0.9	0.861302	0.880114	0.490943	0.783	0.842	0.5908	0.463	0.413583	0.775643	0.602273	0.564	0.955
CLIP-ViT-B-32-yfcc15m	CLIP-ViT-B-32-yfcc15m	yfcc15m	224	0.28	S	151.22	L	ViT	VL	15000000	0.281	0.24	0.06	0.202	0.107	0.152	0.541	0.688	0.626	0.243	0.37	0.272	0.378	0.549	0.0638	0.045	0.030315	0.17403	0.420455	0.167	2.618
CLIP-ViT-g-14-laion2b	CLIP-ViT-g-14-laion2b	laion2b	224	0.28	S	0	L	ViT	VL	2000000000	0.76574	0.6947	0.651378	0.886967	0.571733	0.701	0.915	0.9706	0.948	0.931536	0.952426	0.769519	0.9	0.927	0.7138	0.605	0.533465	0.883596	0.784091	0.702	0.983
CLIP-ViT-H-14-laion2b	CLIP-ViT-H-14-laion2b	laion2b	224	0.28	S	0	L	ViT	VL	2000000000	0.77864	0.7078	0.665409	0.8934	0.593467	0.715	0.918	0.9696	0.942	0.934684	0.956549	0.795753	0.907	0.935	0.7284	0.629	0.573819	0.888974	0.829545	0.73	1.002
CLIP-ViT-L-14-336-openai	CLIP-ViT-L-14-336-openai	wit	336	0.42	M	367.32	L	ViT	VL	400000000	0.76482	0.7081	0.609385	0.8905	0.775867	0.746	0.975	0.9722	0.942	0.91383	0.957659	0.904435	0.929	0.956	0.7154	0.645	0.468701	0.847484	0.943182	0.726	1.015
CLIP-ViT-L-14-ft-cc12m+in1k-equal	CLIP-ViT-L-14-ft-cc12m+in1k-equal	cc12m+in1k-equal	224	0.28	S	367.32	L	ViT	VL	402400000	0.672	0.611	0.511	0.818	0.558	0.625	0.93
CLIP-ViT-L-14-in1k	CLIP-ViT-L-14-in1k	in1k	224	0.28	S	367.32	L	ViT	VL	1200000	0.414	0.33	0.103	0.184	0.051	0.167	0.403	0.622	0.522	0.221	0.215	0.136	0.274	0.441	0.522	0.372	0.201	0.368	0.318	0.315	0.603
CLIP-ViT-L-14-laion2b	CLIP-ViT-L-14-laion2b	laion2b	224	0.28	S	367.32	L	ViT	VL	2000000000	0.75178	0.6776	0.632809	0.874167	0.538667	0.681	0.906	0.9652	0.939	0.923274	0.944656	0.758276	0.891	0.923	0.6922	0.595	0.529528	0.871302	0.772727	0.692	1
CLIP-ViT-L-14-laion400m	CLIP-ViT-L-14-laion400m	laion400m	224	0.28	S	367.32	L	ViT	VL	400000000	0.727	0.654	0.596	0.846	0.465	0.64	0.88	0.9596	0.928	0.902617	0.93308	0.680824	0.861	0.897	0.6498	0.566	0.48937	0.85171	0.772727	0.67	1.031
CLIP-ViT-L-14-WiseFT	CLIP-ViT-L-14-WiseFT	wit+in1k	224	0.28	S	367.32	L	ViT	Wise-FT	401200000	0.853	0.725	0.877	0.631	0.775	0.752	0.882
CLIP-ViT-L-14-WIT-400m	CLIP-ViT-L-14-WIT-400m	wit	224	0.28	S	367.32	L	ViT	VL	400000000	0.755	0.698	0.596	0.878	0.708	0.72	0.954	0.967	0.932	0.907732	0.949889	0.860712	0.913	0.944	0.703	0.643	0.45315	0.842874	0.863636	0.701	0.997
CLIP-ViT-L-14-WIT-400m-ft-in1k	CLIP-ViT-L-14-WIT-400m-ft-in1k	wit+in1k	224	0.28	S	367.32	L	ViT	VL	401200000	0.833	0.748	0.56	0.813	0.627	0.687	0.825	0.975	0.948	0.855	0.887	0.77	0.865	0.887	0.8214	0.682	0.501	0.824	0.739	0.687	0.836
coat_lite_mini	coat_lite_mini	in1k	224	0.28	S	11.01	S	Hybrid	Conventional	1200000	0.802	0.69	0.295	0.415	0.145	0.386	0.481	0.953	0.893	0.460358	0.420869	0.328545	0.526	0.552	0.801	0.663	0.377756	0.625048	0.556818	0.556	0.694
coat_lite_small	coat_lite_small	in1k	224	0.28	S	19.84	S	Hybrid	Conventional	1200000	0.824	0.716	0.334	0.459	0.275	0.446	0.541	0.9668	0.91	0.508755	0.456232	0.433479	0.577	0.597	0.8374	0.681	0.435039	0.666923	0.613636	0.599	0.715
coat_lite_tiny	coat_lite_tiny	in1k	224	0.28	S	5.72	S	Hybrid	Conventional	1200000	0.797	0.684	0.288	0.407	0.125	0.376	0.472	0.9474	0.879	0.451898	0.40961	0.294816	0.509	0.537	0.7852	0.621	0.365748	0.61237	0.545455	0.536	0.683
coat_mini	coat_mini	in1k	224	0.28	S	10.34	S	Hybrid	Conventional	1200000	0.822	0.712	0.329	0.454	0.255	0.438	0.533	0.96	0.908	0.492426	0.409768	0.434728	0.561	0.584	0.8342	0.694	0.429134	0.657318	0.681818	0.616	0.738
coat_tiny	coat_tiny	in1k	224	0.28	S	5.5	S	Hybrid	Conventional	1200000	0.803	0.692	0.298	0.419	0.154	0.391	0.487	0.9476	0.89	0.43616	0.372978	0.32792	0.507	0.535	0.811	0.659	0.388189	0.621206	0.625	0.573	0.707
convit_base	convit_base	in1k	224	0.28	S	86.54	M	Hybrid	Conventional	1200000	0.826	0.72	0.338	0.462	0.295	0.454	0.55	0.964	0.912	0.546724	0.503964	0.470956	0.608	0.631	0.8462	0.671	0.466535	0.707261	0.693182	0.634	0.749
convit_small	convit_small	in1k	224	0.28	S	27.78	S	Hybrid	Conventional	1200000	0.821	0.711	0.327	0.452	0.251	0.435	0.53	0.9644	0.912	0.530002	0.470663	0.427233	0.585	0.607	0.8278	0.672	0.438583	0.69151	0.715909	0.63	0.761
convit_tiny	convit_tiny	in1k	224	0.28	S	5.71	S	Hybrid	Conventional	1200000	0.784	0.669	0.267	0.39	0.088	0.354	0.452	0.9292	0.837	0.423962	0.396131	0.240475	0.474	0.51	0.7442	0.59	0.33622	0.601229	0.488636	0.504	0.677
convmixer_1024_20_ks9_p14	convmixer_1024_20_ks9_p14	in1k	224	0.28	S	24.38	S	Hybrid	Conventional	1200000	0.776	0.659	0.256	0.378	0.071	0.341	0.439	0.9416	0.871	0.472949	0.452268	0.251718	0.512	0.544	0.7926	0.617	0.404331	0.670765	0.556818	0.562	0.709
convmixer_1536_20	convmixer_1536_20	in1k	224	0.28	S	51.63	M	Hybrid	Conventional	1200000	0.814	0.706	0.313	0.438	0.212	0.417	0.512	0.9606	0.913	0.506	0.476689	0.430981	0.582	0.606	0.837	0.686	0.433071	0.676143	0.659091	0.614	0.734
convmixer_768_32	convmixer_768_32	in1k	224	0.28	S	21.11	S	Hybrid	Conventional	1200000	0.804	0.693	0.298	0.42	0.155	0.392	0.488	0.9558	0.911	0.484163	0.457025	0.369769	0.555	0.581	0.8352	0.687	0.42815	0.670765	0.602273	0.597	0.715
convnext_base	convnext_base.fb_in1k	in1k	288	0.36	M	88.59	M	Convolution	Conventional	1200000	0.837	0.733	0.36	0.486	0.367	0.487	0.582	0.97	0.926	0.580169	0.520615	0.553404	0.645	0.665	0.859	0.716	0.496457	0.745294	0.704545	0.666	0.775
convnext_base_384_in22ft1k	convnext_base_384_in22ft1k	in21k	384	0.48	M	88.59	M	Convolution	Conventional	14200000	0.865	0.769	0.504	0.656	0.65	0.645	0.746	0.978	0.938	0.763525	0.659213	0.585259	0.736	0.753	0.8394	0.705	0.50315	0.782174	0.784091	0.694	0.827
convnext_base_in22ft1k	convnext_base_in22ft1k	in21k	224	0.28	S	88.59	M	Convolution	Conventional	14200000	0.855	0.759	0.436	0.575	0.546	0.579	0.677	0.9826	0.939	0.760574	0.657945	0.681449	0.76	0.773	0.8546	0.702	0.494685	0.786016	0.784091	0.692	0.81
convnext_large	convnext_large.fb_in1k	in1k	288	0.36	M	197.77	L	Convolution	Conventional	1200000	0.842	0.739	0.376	0.504	0.414	0.508	0.603	0.9732	0.93	0.59276	0.547574	0.57589	0.662	0.68	0.861	0.708	0.519685	0.752977	0.795455	0.694	0.806
convnext_large_384_in22ft1k	convnext_large_384_in22ft1k	in21k	384	0.48	M	197.77	L	Convolution	Conventional	14200000	0.87	0.773	0.523	0.683	0.679	0.665	0.764	0.9816	0.943	0.769624	0.67745	0.623985	0.754	0.768	0.8512	0.711	0.52126	0.806377	0.784091	0.706	0.829
convnext_large_in22ft1k	convnext_large_in22ft1k	in21k	224	0.28	S	197.77	L	Convolution	Conventional	14200000	0.86	0.763	0.476	0.618	0.598	0.614	0.714	0.983	0.943	0.766673	0.678719	0.730793	0.78	0.793	0.8618	0.71	0.508858	0.7937	0.795455	0.702	0.815
convnext_nano	convnext_nano.d1h_in1k	in1k	288	0.36	M	15.59	S	Convolution	Conventional	1200000	0.817	0.709	0.319	0.444	0.236	0.427	0.523	0.957	0.892	0.506197	0.452585	0.364147	0.554	0.579	0.8322	0.669	0.427756	0.664234	0.602273	0.591	0.71
convnext_small	convnext_small.fb_in1k	in1k	288	0.36	M	50.22	M	Convolution	Conventional	1200000	0.829	0.723	0.345	0.469	0.313	0.463	0.559	0.9688	0.921	0.57171	0.508246	0.505934	0.627	0.647	0.8544	0.697	0.486024	0.737995	0.681818	0.651	0.762
convnext_small_384_in22ft1k	convnext_small_384_in22ft1k	in21k	384	0.48	M	50.22	S	Convolution	Conventional	14200000	0.856	0.76	0.442	0.584	0.562	0.587	0.686	0.9752	0.932	0.691324	0.620044	0.489694	0.683	0.7	0.8258	0.675	0.461811	0.751825	0.670455	0.64	0.775
convnext_small_in22ft1k	convnext_small_in22ft1k	in21k	224	0.28	S	50.22	S	Convolution	Conventional	14200000	0.844	0.742	0.389	0.519	0.448	0.525	0.622	0.9798	0.942	0.685422	0.6183	0.60837	0.714	0.729	0.8366	0.693	0.449409	0.745678	0.727273	0.654	0.782
convnext_tiny	convnext_tiny.fb_in22k_ft_in1k	in1k	288	0.36	M	28.59	S	Convolution	Conventional	1200000	0.82	0.71	0.324	0.449	0.243	0.432	0.527	0.9648	0.913	0.53492	0.504282	0.434728	0.597	0.619	0.8414	0.68	0.462795	0.715713	0.670455	0.632	0.751
convnext_tiny_384_in22ft1k	convnext_tiny_384_in22ft1k	in21k	384	0.48	M	28.59	S	Convolution	Conventional	14200000	0.844	0.742	0.39	0.519	0.448	0.525	0.622	0.9608	0.905	0.59099	0.52236	0.405996	0.606	0.631	0.789	0.627	0.400591	0.655398	0.477273	0.54	0.684
convnext_tiny_hnf	convnext_tiny_hnf.a2h_in1k	in1k	288	0.36	M	28.59	S	Convolution	Conventional	1200000	0.816	0.708	0.316	0.441	0.232	0.424	0.52	0.9636	0.913	0.528625	0.473676	0.446596	0.59	0.612	0.844	0.674	0.461417	0.700346	0.625	0.615	0.729
convnext_tiny_in22ft1k	convnext_tiny_in22ft1k	in21k	224	0.28	S	28.59	S	Convolution	Conventional	14200000	0.837	0.732	0.36	0.486	0.363	0.485	0.579	0.9734	0.929	0.624238	0.551697	0.549656	0.664	0.682	0.8226	0.663	0.420079	0.671917	0.647727	0.601	0.731
convnext_xlarge_384_in22ft1k	convnext_xlarge_384_in22ft1k	in21k	384	0.48	M	0	L	Convolution	Conventional	14200000	0.872	0.78	0.549	0.732	0.708	0.692	0.794	0.9824	0.944	0.790478	0.691881	0.665834	0.773	0.787	0.8542	0.724	0.534843	0.806377	0.806818	0.718	0.841
convnext_xlarge_in22ft1k	convnext_xlarge_in22ft1k	in21k	224	0.28	S	0	L	Convolution	Conventional	14200000	0.864	0.768	0.49	0.642	0.626	0.632	0.731	0.9828	0.952	0.783986	0.685062	0.748282	0.792	0.806	0.867	0.727	0.522047	0.80292	0.852273	0.726	0.837
crossvit_15_240	crossvit_15_240	in1k	240	0.3	M	27.53	S	ViT	Conventional	1200000	0.822	0.712	0.328	0.454	0.255	0.437	0.532	0.9616	0.904	0.516821	0.460514	0.423485	0.576	0.599	0.8274	0.661	0.445472	0.696888	0.636364	0.61	0.737
crossvit_15_dagger_240	crossvit_15_dagger_240	in1k	240	0.3	M	28.21	S	ViT	Conventional	1200000	0.825	0.717	0.335	0.459	0.285	0.449	0.544	0.9642	0.913	0.529412	0.467016	0.461587	0.593	0.615	0.839	0.682	0.462205	0.707261	0.704545	0.639	0.762
crossvit_15_dagger_408	crossvit_15_dagger_408	in1k	408	0.51	L	28.5	S	ViT	Conventional	1200000	0.842	0.74	0.379	0.507	0.419	0.511	0.607	0.968	0.909	0.498918	0.442436	0.49594	0.587	0.606	0.857	0.704	0.448819	0.702651	0.715909	0.643	0.75
crossvit_18_240	crossvit_18_240	in1k	240	0.3	M	43.27	S	ViT	Conventional	1200000	0.828	0.723	0.342	0.465	0.306	0.459	0.554	0.9666	0.905	0.516624	0.464954	0.444722	0.583	0.603	0.8388	0.683	0.460827	0.698425	0.625	0.617	0.736
crossvit_18_dagger_240	crossvit_18_dagger_240	in1k	240	0.3	M	44.27	S	ViT	Conventional	1200000	0.827	0.722	0.341	0.465	0.305	0.458	0.554	0.9692	0.91	0.530986	0.471614	0.485322	0.599	0.618	0.8396	0.688	0.465945	0.710718	0.659091	0.631	0.752
crossvit_18_dagger_408	crossvit_18_dagger_408	in1k	408	0.51	L	44.61	S	ViT	Conventional	1200000	0.844	0.742	0.388	0.519	0.443	0.523	0.62	0.9692	0.907	0.493016	0.453061	0.532792	0.596	0.615	0.8576	0.721	0.470276	0.710334	0.715909	0.654	0.763
crossvit_9_240	crossvit_9_240	in1k	240	0.3	M	8.55	S	ViT	Conventional	1200000	0.781	0.666	0.264	0.387	0.083	0.35	0.448	0.9306	0.832	0.417273	0.382493	0.232355	0.466	0.501	0.7492	0.568	0.327756	0.610065	0.488636	0.499	0.666
crossvit_9_dagger_240	crossvit_9_dagger_240	in1k	240	0.3	M	8.78	S	ViT	Conventional	1200000	0.797	0.684	0.289	0.408	0.126	0.377	0.473	0.9488	0.86	0.459571	0.421503	0.296065	0.509	0.536	0.7848	0.623	0.372441	0.641952	0.556818	0.549	0.7
crossvit_base_240	crossvit_base_240	in1k	240	0.3	M	105.03	L	ViT	Conventional	1200000	0.829	0.724	0.346	0.47	0.313	0.463	0.559	0.967	0.905	0.525674	0.471139	0.495315	0.599	0.619	0.8398	0.669	0.441142	0.714176	0.613636	0.609	0.725
crossvit_small_240	crossvit_small_240	in1k	240	0.3	M	26.86	S	ViT	Conventional	1200000	0.816	0.709	0.318	0.442	0.234	0.426	0.522	0.9594	0.902	0.508361	0.447827	0.401624	0.565	0.589	0.824	0.667	0.437795	0.693815	0.625	0.606	0.735
crossvit_tiny_240	crossvit_tiny_240	in1k	240	0.3	M	7.01	S	ViT	Conventional	1200000	0.785	0.67	0.27	0.394	0.091	0.356	0.454	0.9296	0.841	0.414322	0.374405	0.248595	0.47	0.506	0.7436	0.578	0.323228	0.590473	0.545455	0.509	0.685
cs3darknet_focus_l	cs3darknet_focus_l	in1k	288	0.36	M	21.15	S	convolution	Conventional	1200000	0.807	0.696	0.304	0.427	0.17	0.399	0.494	0.9536	0.886	0.481409	0.432921	0.281699	0.521	0.546	0.819	0.644	0.416732	0.651556	0.522727	0.559	0.683
cs3darknet_focus_m	cs3darknet_focus_m	in1k	288	0.36	M	9.3	S	convolution	Conventional	1200000	0.776	0.658	0.255	0.377	0.069	0.34	0.438	0.9346	0.864	0.454849	0.420552	0.193004	0.483	0.517	0.7778	0.612	0.369488	0.623896	0.465909	0.518	0.666
cs3darknet_l	cs3darknet_l	in1k	288	0.36	M	21.16	S	convolution	Conventional	1200000	0.81	0.7	0.307	0.43	0.183	0.405	0.5	0.9538	0.9	0.497738	0.443704	0.282948	0.531	0.557	0.8232	0.667	0.422047	0.658087	0.511364	0.565	0.686
cs3darknet_m	cs3darknet_m	in1k	288	0.36	M	9.31	S	convolution	Conventional	1200000	0.781	0.664	0.263	0.386	0.08	0.348	0.446	0.9382	0.871	0.453079	0.410086	0.209869	0.486	0.518	0.782	0.615	0.367126	0.612755	0.443182	0.51	0.652
cs3darknet_x	cs3darknet_x	in1k	288	0.36	M	35.05	S	convolution	Conventional	1200000	0.82	0.71	0.325	0.45	0.244	0.432	0.527	0.9586	0.9	0.483573	0.447827	0.339788	0.543	0.566	0.843	0.684	0.427362	0.671149	0.579545	0.591	0.701
cs3edgenet_x	cs3edgenet_x	in1k	288	0.36	M	47.82	S	convolution	Conventional	1200000	0.824	0.717	0.334	0.459	0.283	0.448	0.544	0.96	0.913	0.514657	0.461782	0.373517	0.566	0.59	0.8408	0.692	0.459449	0.699193	0.613636	0.616	0.733
cs3se_edgenet_x	cs3se_edgenet_x	in1k	320	0.4	M	50.72	M	convolution	Conventional	1200000	0.834	0.731	0.355	0.482	0.354	0.481	0.577	0.9616	0.91	0.545151	0.474627	0.422236	0.588	0.611	0.8462	0.688	0.463976	0.706877	0.590909	0.612	0.723
cs3sedarknet_l	cs3sedarknet_l	in1k	288	0.36	M	21.91	S	convolution	Conventional	1200000	0.818	0.709	0.321	0.446	0.24	0.429	0.524	0.9552	0.9	0.508755	0.451316	0.346658	0.552	0.578	0.83	0.672	0.429134	0.648867	0.613636	0.591	0.712
cs3sedarknet_x	cs3sedarknet_x	in1k	288	0.36	M	35.4	S	convolution	Conventional	1200000	0.826	0.72	0.339	0.462	0.296	0.454	0.55	0.9606	0.903	0.476687	0.44751	0.394753	0.555	0.578	0.8358	0.685	0.43878	0.684211	0.579545	0.597	0.714
cspdarknet53	cspdarknet53	in1k	256	0.32	M	27.64	S	convolution	Conventional	1200000	0.796	0.683	0.287	0.407	0.12	0.374	0.47	0.9534	0.886	0.497147	0.462575	0.252967	0.525	0.551	0.817	0.653	0.420866	0.661544	0.5	0.559	0.684
cspresnet50	cspresnet50	in1k	256	0.32	M	21.62	S	convolution	Conventional	1200000	0.787	0.671	0.271	0.395	0.093	0.358	0.455	0.9456	0.888	0.492622	0.448779	0.241099	0.518	0.548	0.8118	0.63	0.420276	0.663849	0.568182	0.571	0.703
cspresnext50	cspresnext50	in1k	256	0.32	M	20.57	S	convolution	Conventional	1200000	0.798	0.684	0.289	0.409	0.131	0.378	0.474	0.9564	0.89	0.487507	0.465113	0.292317	0.534	0.558	0.8204	0.666	0.424606	0.660392	0.488636	0.56	0.683
darknet53	darknet53	in1k	288	0.36	M	41.61	S	convolution	Conventional	1200000	0.803	0.69	0.296	0.416	0.147	0.387	0.482	0.9486	0.885	0.477474	0.428957	0.261087	0.513	0.541	0.8164	0.646	0.410039	0.62428	0.556818	0.559	0.685
darknetaa53	darknetaa53	in1k	288	0.36	M	36.02	S	convolution	Conventional	1200000	0.803	0.69	0.295	0.416	0.146	0.387	0.482	0.9522	0.878	0.463899	0.424675	0.274204	0.51	0.536	0.8102	0.636	0.413189	0.626585	0.522727	0.55	0.679
deit_base_distilled_patch16_224	deit_base_distilled_patch16_224	in1k	224	0.28	S	87.34	M	ViT	Conventional	1200000	0.826	0.72	0.34	0.463	0.296	0.455	0.551	0.9724	0.927	0.564824	0.53124	0.497189	0.63	0.648	0.8534	0.696	0.483465	0.756435	0.727273	0.666	0.78
deit_base_distilled_patch16_384	deit_base_distilled_patch16_384	in1k	384	0.48	M	87.63	M	ViT	Conventional	1200000	0.851	0.751	0.405	0.536	0.493	0.546	0.642	0.975	0.942	0.558528	0.539803	0.667708	0.677	0.694	0.8778	0.735	0.491732	0.752977	0.795455	0.694	0.791
deit_base_patch16_224	deit_base_patch16_224	in1k	224	0.28	S	86.57	M	ViT	Conventional	1200000	0.824	0.716	0.334	0.459	0.274	0.446	0.541	0.9634	0.906	0.498918	0.464954	0.46471	0.584	0.606	0.844	0.665	0.435827	0.683826	0.579545	0.591	0.7
deit_base_patch16_384	deit_base_patch16_384	in1k	384	0.48	M	86.86	M	ViT	Conventional	1200000	0.84	0.738	0.371	0.501	0.402	0.503	0.599	0.968	0.917	0.489081	0.456232	0.588382	0.613	0.633	0.8522	0.684	0.430512	0.666154	0.715909	0.624	0.732
deit_small_distilled_patch16_224	deit_small_distilled_patch16_224	in1k	224	0.28	S	22.44	S	ViT	Conventional	1200000	0.813	0.705	0.312	0.437	0.207	0.415	0.51	0.9614	0.917	0.524493	0.488265	0.405372	0.584	0.607	0.8326	0.679	0.452953	0.724164	0.670455	0.632	0.759
deit_small_patch16_224	deit_small_patch16_224	in1k	224	0.28	S	22.05	S	ViT	Conventional	1200000	0.81	0.701	0.309	0.432	0.189	0.408	0.504	0.957	0.893	0.48613	0.441484	0.387883	0.552	0.577	0.8134	0.657	0.411417	0.68229	0.556818	0.577	0.709
deit_tiny_distilled_patch16_224	deit_tiny_distilled_patch16_224	in1k	224	0.28	S	5.91	S	ViT	Conventional	1200000	0.779	0.662	0.26	0.384	0.077	0.346	0.444	0.9354	0.844	0.433602	0.406914	0.232979	0.479	0.512	0.7678	0.598	0.344094	0.632731	0.534091	0.527	0.686
deit_tiny_patch16_224	deit_tiny_patch16_224	in1k	224	0.28	S	5.72	S	ViT	Conventional	1200000	0.779	0.661	0.259	0.382	0.073	0.344	0.442	0.9228	0.843	0.402912	0.37504	0.217364	0.46	0.498	0.737	0.564	0.307087	0.584326	0.556818	0.503	0.682
deit3_base_patch16_224	deit3_base_patch16_224	in1k	224	0.28	S	86.59	M	ViT	Conventional	1200000	0.839	0.737	0.37	0.496	0.392	0.499	0.595	0.9714	0.926	0.611056	0.549001	0.569644	0.664	0.684	0.8544	0.697	0.522638	0.763734	0.738636	0.681	0.797
deit3_base_patch16_224_in21ft1k	deit3_base_patch16_224_in21ft1k	in21k	224	0.28	S	86.59	M	ViT	Conventional	14200000	0.858	0.761	0.456	0.589	0.573	0.595	0.693	0.9792	0.945	0.730081	0.636537	0.740787	0.763	0.779	0.8544	0.713	0.519685	0.776796	0.806818	0.704	0.824
deit3_base_patch16_384	deit3_base_patch16_384	in1k	384	0.48	M	86.88	M	ViT	Conventional	1200000	0.854	0.756	0.426	0.564	0.534	0.57	0.667	0.9746	0.932	0.575251	0.538218	0.698938	0.686	0.704	0.8666	0.733	0.508465	0.754514	0.806818	0.701	0.809
deit3_base_patch16_384_in21ft1k	deit3_base_patch16_384_in21ft1k	in21k	384	0.48	M	86.88	M	ViT	Conventional	14200000	0.875	0.788	0.564	0.756	0.713	0.705	0.806	0.9836	0.938	0.739327	0.648747	0.814491	0.785	0.798	0.8738	0.748	0.527165	0.784095	0.875	0.734	0.84
deit3_huge_patch14_224	deit3_huge_patch14_224	in1k	224	0.28	S	632.13	L	ViT	Conventional	1200000	0.854	0.758	0.433	0.573	0.543	0.577	0.676	0.9762	0.928	0.65906	0.601491	0.692067	0.72	0.738	0.8722	0.729	0.562992	0.810603	0.784091	0.722	0.828
deit3_huge_patch14_224_in21ft1k	deit3_huge_patch14_224_in21ft1k	in21k	224	0.28	S	632.13	L	ViT	Conventional	14200000	0.872	0.779	0.549	0.727	0.702	0.689	0.79	0.982	0.948	0.810151	0.733111	0.826359	0.829	0.844	0.8708	0.759	0.574606	0.832117	0.818182	0.746	0.857
deit3_large_patch16_224	deit3_large_patch16_224	in1k	224	0.28	S	304.37	L	ViT	Conventional	1200000	0.85	0.751	0.402	0.535	0.486	0.544	0.64	0.9738	0.931	0.640173	0.578655	0.646471	0.699	0.718	0.8604	0.705	0.553937	0.789858	0.772727	0.705	0.819
deit3_large_patch16_224_in21ft1k	deit3_large_patch16_224_in21ft1k	in21k	224	0.28	S	304.37	L	ViT	Conventional	14200000	0.87	0.778	0.536	0.706	0.687	0.677	0.778	0.9816	0.946	0.803856	0.724548	0.816365	0.823	0.838	0.8698	0.754	0.57815	0.836343	0.852273	0.755	0.868
deit3_large_patch16_384	deit3_large_patch16_384	in1k	384	0.48	M	304.76	L	ViT	Conventional	1200000	0.861	0.765	0.477	0.626	0.605	0.618	0.718	0.9784	0.942	0.652764	0.601332	0.769519	0.741	0.757	0.8736	0.748	0.557087	0.779101	0.909091	0.748	0.856
deit3_large_patch16_384_in21ft1k	deit3_large_patch16_384_in21ft1k	in21k	384	0.48	M	304.76	L	ViT	Conventional	14200000	0.882	0.795	0.575	0.765	0.792	0.732	0.83	0.9846	0.947	0.803659	0.732794	0.880075	0.841	0.854	0.8862	0.767	0.575591	0.8398	0.897727	0.77	0.869
deit3_small_patch16_224	deit3_small_patch16_224	in1k	224	0.28	S	22.06	S	ViT	Conventional	1200000	0.823	0.714	0.33	0.456	0.262	0.441	0.536	0.9612	0.901	0.543577	0.466223	0.422236	0.583	0.607	0.8206	0.657	0.472638	0.678448	0.681818	0.622	0.758
deit3_small_patch16_224_in21ft1k	deit3_small_patch16_224_in21ft1k	in21k	224	0.28	S	22.06	S	ViT	Conventional	1200000	0.841	0.739	0.375	0.503	0.412	0.507	0.603	0.9704	0.933	0.639189	0.543609	0.595253	0.678	0.699	0.8228	0.698	0.473228	0.705724	0.704545	0.645	0.784
deit3_small_patch16_384	deit3_small_patch16_384	in1k	384	0.48	M	22.21	S	ViT	Conventional	1200000	0.841	0.739	0.372	0.502	0.403	0.504	0.599	0.9736	0.927	0.550856	0.490802	0.574641	0.636	0.653	0.849	0.702	0.477559	0.704572	0.761364	0.661	0.779
deit3_small_patch16_384_in21ft1k	deit3_small_patch16_384_in21ft1k	in21k	384	0.48	M	22.21	S	ViT	Conventional	14200000	0.857	0.761	0.446	0.586	0.571	0.591	0.69	0.9762	0.932	0.660043	0.559784	0.732042	0.721	0.739	0.85	0.704	0.462008	0.726085	0.795455	0.672	0.791
densenet121	densenet121	in1k	224	0.28	S	7.98	S	Convolution	Conventional	1200000	0.766	0.644	0.241	0.362	0.053	0.325	0.424	0.9348	0.85	0.453079	0.422296	0.205497	0.483	0.517	0.7696	0.608	0.373228	0.631579	0.477273	0.523	0.68
densenet161	densenet161	in1k	224	0.28	S	28.68	S	Convolution	Conventional	1200000	0.771	0.653	0.286	0.402	0.042	0.346	0.449	0.9416	0.878	0.460752	0.426419	0.229232	0.499	0.53	0.8092	0.654	0.420079	0.675375	0.488636	0.56	0.692
densenet169	densenet169	in1k	224	0.28	S	14.15	S	Convolution	Conventional	1200000	0.756	0.635	0.273	0.396	0.032	0.334	0.442	0.937	0.871	0.458391	0.428481	0.183635	0.485	0.518	0.793	0.632	0.401575	0.654629	0.465909	0.539	0.68
densenet201	densenet201	in1k	224	0.28	S	20.01	S	Convolution	Conventional	1200000	0.769	0.648	0.277	0.408	0.039	0.343	0.446	0.943	0.874	0.47531	0.431018	0.191755	0.493	0.523	0.798	0.625	0.397441	0.68229	0.420455	0.531	0.665
densenetblur121d	densenetblur121d	in1k	224	0.28	S	8	S	Convolution	Conventional	1200000	0.779	0.663	0.26	0.384	0.077	0.346	0.444	0.9406	0.88	0.442849	0.425626	0.246096	0.499	0.531	0.7878	0.621	0.384449	0.65655	0.477273	0.535	0.679
dla102	dla102	in1k	224	0.28	S	33.27	S	Convolution	Conventional	1200000	0.769	0.649	0.248	0.367	0.059	0.331	0.43	0.9458	0.874	0.430454	0.409768	0.22361	0.484	0.512	0.8052	0.657	0.376378	0.634268	0.556818	0.556	0.691
dla102x	dla102x	in1k	224	0.28	S	26.31	S	Convolution	Conventional	1200000	0.781	0.666	0.263	0.387	0.082	0.35	0.448	0.9472	0.897	0.454849	0.425944	0.26421	0.511	0.539	0.8202	0.646	0.407087	0.659624	0.511364	0.556	0.678
dla102x2	dla102x2	in1k	224	0.28	S	41.28	S	Convolution	Conventional	1200000	0.795	0.68	0.285	0.405	0.116	0.372	0.468	0.9538	0.886	0.481212	0.443546	0.276702	0.522	0.547	0.8256	0.667	0.41437	0.662697	0.534091	0.57	0.69
dla169	dla169	in1k	224	0.28	S	53.39	M	Convolution	Conventional	1200000	0.783	0.668	0.266	0.389	0.087	0.353	0.451	0.952	0.89	0.480031	0.430542	0.239225	0.51	0.536	0.811	0.647	0.418701	0.660392	0.522727	0.562	0.693
dla34	dla34	in1k	224	0.28	S	15.74	S	Convolution	Conventional	1200000	0.739	0.616	0.215	0.335	0.033	0.3	0.406	0.9318	0.85	0.422388	0.395972	0.180512	0.462	0.496	0.7768	0.594	0.36122	0.613139	0.488636	0.514	0.662
dla46_c	dla46_c	in1k	224	0.28	S	1.3	S	Convolution	Conventional	1200000	0.649	0.519	0.144	0.262	0.015	0.235	0.362	0.8732	0.772	0.291363	0.316048	0.118676	0.375	0.429	0.6792	0.502	0.221457	0.474068	0.431818	0.407	0.599
dla46x_c	dla46x_c	in1k	224	0.28	S	1.07	S	Convolution	Conventional	1200000	0.683	0.557	0.166	0.28	0.018	0.255	0.373	0.8876	0.775	0.297069	0.309229	0.125547	0.377	0.425	0.696	0.503	0.233268	0.486746	0.465909	0.422	0.606
dla60	dla60	in1k	224	0.28	S	22.04	S	Convolution	Conventional	1200000	0.746	0.626	0.219	0.339	0.038	0.306	0.41	0.9428	0.865	0.439504	0.410561	0.185509	0.475	0.504	0.802	0.643	0.387402	0.636957	0.488636	0.539	0.672
dla60_res2net	dla60_res2net	in1k	224	0.28	S	20.85	S	Convolution	Conventional	1200000	0.779	0.662	0.259	0.383	0.076	0.345	0.443	0.9458	0.887	0.441472	0.395814	0.242349	0.492	0.52	0.81	0.639	0.371654	0.61698	0.443182	0.518	0.64
dla60_res2next	dla60_res2next	in1k	224	0.28	S	17.03	S	Convolution	Conventional	1200000	0.78	0.664	0.262	0.386	0.078	0.348	0.446	0.9472	0.889	0.423765	0.40739	0.242973	0.491	0.518	0.8118	0.628	0.362008	0.60776	0.477273	0.519	0.639
dla60x	dla60x	in1k	224	0.28	S	17.35	S	Convolution	Conventional	1200000	0.773	0.654	0.253	0.371	0.064	0.336	0.435	0.9486	0.889	0.458194	0.417856	0.234853	0.5	0.527	0.813	0.633	0.378543	0.64733	0.488636	0.537	0.661
dla60x_c	dla60x_c	in1k	224	0.28	S	1.32	S	Convolution	Conventional	1200000	0.67	0.534	0.161	0.265	0.016	0.244	0.364	0.8926	0.793	0.297856	0.323343	0.137414	0.388	0.435	0.719	0.549	0.26122	0.515175	0.465909	0.448	0.623
dm_nfnet_f0	dm_nfnet_f0	in1k	256	0.32	M	71.49	M	Convolution	Conventional	1200000	0.828	0.723	0.342	0.465	0.305	0.459	0.554	0.968	0.913	0.556364	0.479226	0.437227	0.596	0.616	0.851	0.7	0.476575	0.712639	0.636364	0.631	0.741
dm_nfnet_f1	dm_nfnet_f1	in1k	320	0.4	M	132.63	L	Convolution	Conventional	1200000	0.845	0.744	0.393	0.523	0.453	0.528	0.625	0.9692	0.92	0.585678	0.500317	0.485946	0.623	0.643	0.8574	0.718	0.520276	0.757972	0.704545	0.675	0.787
dm_nfnet_f2	dm_nfnet_f2	in1k	352	0.44	M	193.78	L	Convolution	Conventional	1200000	0.85	0.751	0.404	0.535	0.489	0.545	0.641	0.9656	0.919	0.600433	0.513796	0.470331	0.626	0.648	0.8564	0.713	0.50374	0.747215	0.693182	0.664	0.775
dm_nfnet_f3	dm_nfnet_f3	in1k	416	0.52	L	254.92	M	Convolution	Conventional	1200000	0.856	0.76	0.441	0.581	0.558	0.585	0.683	0.9652	0.922	0.6325	0.52458	0.452217	0.633	0.656	0.8502	0.698	0.523031	0.767192	0.659091	0.662	0.779
dm_nfnet_f4	dm_nfnet_f4	in1k	512	0.64	L	316.07	L	Convolution	Conventional	1200000	0.858	0.762	0.458	0.602	0.581	0.601	0.7	0.96	0.909	0.629746	0.540121	0.391006	0.617	0.643	0.8364	0.689	0.526575	0.762197	0.613636	0.648	0.775
dm_nfnet_f5	dm_nfnet_f5	in1k	544	0.68	L	377.21	L	Convolution	Conventional	1200000	0.858	0.763	0.459	0.603	0.586	0.603	0.703	0.9566	0.895	0.626795	0.52569	0.376015	0.606	0.633	0.8334	0.692	0.512992	0.75874	0.602273	0.642	0.77
dm_nfnet_f6	dm_nfnet_f6	in1k	576	0.72	L	438.36	L	Convolution	Conventional	1200000	0.859	0.763	0.474	0.612	0.592	0.61	0.71	0.9532	0.888	0.644501	0.529813	0.334791	0.599	0.628	0.8312	0.681	0.51122	0.758356	0.545455	0.624	0.751
dpn107	dpn107	in1k	224	0.28	S	86.92	M	Convolution	Conventional	1200000	0.793	0.678	0.282	0.403	0.111	0.369	0.465	0.9494	0.893	0.474326	0.439423	0.267333	0.519	0.547	0.8216	0.658	0.422638	0.656166	0.5	0.559	0.68
dpn131	dpn131	in1k	224	0.28	S	79.25	M	Convolution	Conventional	1200000	0.791	0.676	0.279	0.4	0.107	0.366	0.463	0.9524	0.891	0.488688	0.444814	0.251718	0.519	0.545	0.823	0.65	0.435827	0.673454	0.522727	0.571	0.694
dpn68	dpn68	in1k	224	0.28	S	12.61	S	Convolution	Conventional	1200000	0.759	0.631	0.261	0.39	0.036	0.33	0.435	0.936	0.861	0.449341	0.422772	0.189257	0.481	0.514	0.7892	0.61	0.38248	0.653861	0.409091	0.514	0.651
dpn68	dpn68	in1k	224	0.28	S	12.61	S	Convolution	Conventional	1200000	0.749	0.628	0.221	0.344	0.039	0.308	0.411	0.936	0.861	0.449341	0.422772	0.189257	0.481	0.514	0.7892	0.61	0.38248	0.653861	0.409091	0.514	0.651
dpn68b	dpn68b	in1k	224	0.28	S	12.61	S	Convolution	Conventional	1200000	0.788	0.673	0.274	0.396	0.098	0.36	0.457	0.9476	0.894	0.478851	0.443863	0.255465	0.518	0.547	0.8144	0.645	0.419488	0.679216	0.5	0.561	0.689
dpn68b	dpn68b	in1k	224	0.28	S	12.61	S	Convolution	Conventional	1200000	0.77	0.648	0.28	0.388	0.061	0.344	0.447	0.9476	0.894	0.478851	0.443863	0.255465	0.518	0.547	0.8144	0.645	0.419488	0.679216	0.5	0.561	0.689
dpn92	dpn92	in1k	224	0.28	S	37.67	S	Convolution	Conventional	1200000	0.795	0.68	0.285	0.405	0.116	0.372	0.468	0.9532	0.89	0.494983	0.436093	0.269207	0.523	0.549	0.8128	0.642	0.406299	0.640799	0.397727	0.522	0.642
dpn98	dpn98	in1k	224	0.28	S	61.57	M	Convolution	Conventional	1200000	0.79	0.675	0.276	0.397	0.101	0.362	0.458	0.9506	0.897	0.493409	0.430701	0.257339	0.52	0.547	0.8228	0.669	0.41811	0.654245	0.431818	0.543	0.66
eca_botnext26ts_256	eca_botnext26ts_256	in1k	256	0.32	M	10.59	S	ViT	Conventional	1200000	0.799	0.687	0.291	0.413	0.134	0.381	0.477	0.9532	0.894	0.428487	0.391373	0.326671	0.51	0.535	0.8116	0.639	0.358465	0.588552	0.625	0.553	0.681
eca_halonext26ts	eca_halonext26ts	in1k	256	0.32	M	10.76	S	ViT	Conventional	1200000	0.798	0.684	0.289	0.408	0.129	0.378	0.474	0.9526	0.89	0.433799	0.405011	0.316052	0.511	0.536	0.8184	0.641	0.364173	0.592393	0.602273	0.55	0.672
eca_nfnet_l0	eca_nfnet_l0	in1k	288	0.36	M	24.14	S	Convolution	Conventional	1200000	0.821	0.711	0.327	0.452	0.248	0.435	0.53	0.963	0.914	0.521346	0.471773	0.398501	0.576	0.598	0.8386	0.682	0.441732	0.691126	0.579545	0.599	0.714
eca_nfnet_l1	eca_nfnet_l1	in1k	320	0.4	M	41.41	S	Convolution	Conventional	1200000	0.838	0.734	0.364	0.493	0.375	0.492	0.587	0.9664	0.911	0.560496	0.501586	0.452217	0.606	0.627	0.8486	0.697	0.492717	0.721091	0.602273	0.628	0.74
eca_nfnet_l2	eca_nfnet_l2	in1k	384	0.48	M	56.72	M	Convolution	Conventional	1200000	0.845	0.742	0.39	0.521	0.45	0.526	0.622	0.9638	0.913	0.593941	0.530606	0.407245	0.611	0.634	0.8342	0.683	0.499606	0.737995	0.590909	0.628	0.753
eca_resnet33ts	eca_resnet33ts	in1k	256	0.32	M	19.68	S	Convolution	Conventional	1200000	0.801	0.688	0.294	0.414	0.141	0.384	0.479	0.9498	0.886	0.491049	0.442277	0.28857	0.527	0.555	0.8166	0.636	0.38622	0.630042	0.556818	0.552	0.676
eca_resnext26ts	eca_resnext26ts	in1k	256	0.32	M	10.3	S	Convolution	Conventional	1200000	0.781	0.666	0.263	0.386	0.081	0.349	0.447	0.9406	0.864	0.442652	0.414209	0.23173	0.488	0.519	0.7864	0.581	0.354331	0.578947	0.454545	0.492	0.626
ecaresnet269d	ecaresnet269d	in1k	352	0.44	M	102.09	L	Convolution	Conventional	1200000	0.846	0.745	0.396	0.524	0.459	0.531	0.628	0.9702	0.919	0.614401	0.536949	0.455965	0.632	0.651	0.8492	0.697	0.509252	0.771418	0.636364	0.654	0.77
ecaresnet26t	ecaresnet26t	in1k	320	0.4	M	16.01	S	Convolution	Conventional	1200000	0.803	0.692	0.298	0.419	0.155	0.391	0.487	0.9498	0.876	0.452489	0.429115	0.257964	0.504	0.531	0.8048	0.62	0.38563	0.628506	0.534091	0.542	0.673
ecaresnet50t	ecaresnet50t	in1k	320	0.4	M	25.57	S	Convolution	Conventional	1200000	0.822	0.713	0.33	0.455	0.261	0.44	0.535	0.9574	0.889	0.516231	0.473993	0.325422	0.551	0.576	0.8248	0.67	0.446654	0.69612	0.545455	0.59	0.715
edgenext_small	edgenext_small	in1k	320	0.4	M	5.59	S	Convolution	Conventional	1200000	0.81	0.701	0.309	0.431	0.187	0.407	0.502	0.956	0.893	0.537084	0.475737	0.321049	0.557	0.583	0.8234	0.656	0.440157	0.694583	0.636364	0.607	0.737
edgenext_small_rw	edgenext_small_rw	in1k	320	0.4	M	7.83	S	Convolution	Conventional	1200000	0.804	0.694	0.299	0.422	0.16	0.394	0.49	0.946	0.874	0.507378	0.451475	0.311056	0.536	0.567	0.8072	0.625	0.407874	0.660008	0.5	0.548	0.679
edgenext_x_small	edgenext_x_small	in1k	288	0.36	M	2.34	S	Convolution	Conventional	1200000	0.772	0.654	0.253	0.371	0.064	0.336	0.435	0.928	0.847	0.39819	0.361878	0.194254	0.45	0.485	0.7684	0.574	0.326772	0.54514	0.465909	0.478	0.622
edgenext_xx_small	edgenext_xx_small	in1k	288	0.36	M	1.33	S	Convolution	Conventional	1200000	0.747	0.626	0.219	0.341	0.038	0.306	0.41	0.9042	0.812	0.365729	0.334285	0.171768	0.421	0.466	0.7278	0.545	0.283661	0.527852	0.431818	0.447	0.614
efficientnet_b0	efficientnet_b0.ra_in1k	in1k	224	0.28	S	5.29	S	Convolution	Conventional	1200000	0.778	0.661	0.258	0.381	0.072	0.343	0.441	0.9398	0.865	0.422782	0.397082	0.243598	0.482	0.513	0.7964	0.619	0.36063	0.605071	0.443182	0.507	0.637
efficientnet_b1	efficientnet_b1.ft_in1k	in1k	256	0.32	M	7.79	S	Convolution	Conventional	1200000	0.788	0.673	0.274	0.396	0.1	0.361	0.458	0.9448	0.879	0.442652	0.411037	0.23985	0.493	0.522	0.806	0.639	0.369882	0.603919	0.477273	0.523	0.649
efficientnet_b2	efficientnet_b2.ra_in1k	in1k	288	0.36	M	9.11	S	Convolution	Conventional	1200000	0.802	0.689	0.294	0.415	0.144	0.386	0.481	0.9462	0.88	0.491442	0.441326	0.267958	0.52	0.55	0.8052	0.624	0.408071	0.645793	0.375	0.513	0.637
efficientnet_b3	efficientnet_b3.ra2_in1k	in1k	320	0.4	M	12.23	S	Convolution	Conventional	1200000	0.816	0.708	0.316	0.441	0.232	0.424	0.52	0.9494	0.889	0.53433	0.486521	0.297939	0.552	0.581	0.8004	0.638	0.445472	0.684595	0.545455	0.578	0.722
efficientnet_b4	efficientnet_b4.ra2_in1k	in1k	384	0.48	M	19.34	S	Convolution	Conventional	1200000	0.828	0.723	0.344	0.468	0.308	0.461	0.557	0.9508	0.892	0.588629	0.511893	0.32792	0.58	0.61	0.809	0.636	0.464764	0.722628	0.5	0.581	0.718
efficientnet_el	efficientnet_el.ra_in1k	in1k	300	0.375	M	10.59	S	Convolution	Conventional	1200000	0.809	0.697	0.305	0.428	0.173	0.401	0.496	0.9484	0.88	0.491639	0.456232	0.269207	0.524	0.553	0.8152	0.647	0.42815	0.655782	0.465909	0.549	0.673
efficientnet_el_pruned	efficientnet_el_pruned.in1k	in1k	300	0.375	M	10.59	S	Convolution	Conventional	1200000	0.802	0.689	0.295	0.415	0.145	0.386	0.481	0.9428	0.877	0.47649	0.440691	0.243598	0.509	0.54	0.8016	0.636	0.398819	0.62428	0.5	0.54	0.674
efficientnet_em	efficientnet_em.ra2_in1k	in1k	240	0.3	M	6.9	S	Convolution	Conventional	1200000	0.797	0.683	0.287	0.407	0.124	0.375	0.471	0.948	0.896	0.490458	0.452109	0.286696	0.531	0.56	0.8036	0.646	0.415354	0.655398	0.477273	0.549	0.683
efficientnet_es	efficientnet_es.ra_in1k	in1k	224	0.28	S	5.44	S	Convolution	Conventional	1200000	0.775	0.657	0.255	0.375	0.067	0.339	0.437	0.9454	0.876	0.450325	0.425785	0.245472	0.499	0.528	0.8032	0.639	0.394094	0.621206	0.454545	0.527	0.656
efficientnet_es_pruned	efficientnet_es_pruned.in1k	in1k	224	0.28	S	5.44	S	Convolution	Conventional	1200000	0.753	0.631	0.227	0.35	0.042	0.313	0.416	0.929	0.852	0.427503	0.400729	0.191755	0.468	0.504	0.7702	0.616	0.346457	0.596235	0.386364	0.486	0.631
efficientnet_lite0	efficientnet_lite0.ra_in1k	in1k	224	0.28	S	4.65	S	Convolution	Conventional	1200000	0.739	0.619	0.215	0.335	0.033	0.301	0.407	0.9326	0.863	0.421798	0.403267	0.181137	0.467	0.501	0.7774	0.585	0.347047	0.592009	0.5	0.506	0.651
efficientnetv2_rw_m	efficientnetv2_rw_m.agc_in1k	in1k	416	0.52	L	53.24	M	Convolution	Conventional	1200000	0.848	0.746	0.397	0.529	0.463	0.534	0.63	0.9592	0.917	0.622074	0.5536	0.380387	0.618	0.644	0.8336	0.684	0.510433	0.759892	0.625	0.645	0.774
efficientnetv2_rw_s	efficientnetv2_rw_s.ra2_in1k	in1k	384	0.48	M	23.94	S	Convolution	Conventional	1200000	0.837	0.733	0.362	0.487	0.368	0.488	0.583	0.9604	0.915	0.58194	0.509515	0.36852	0.594	0.618	0.8276	0.641	0.484843	0.739531	0.590909	0.614	0.742
efficientnetv2_rw_t	efficientnetv2_rw_t.ra2_in1k	in1k	288	0.36	M	13.65	S	Convolution	Conventional	1200000	0.82	0.71	0.324	0.449	0.243	0.432	0.527	0.9606	0.908	0.538068	0.47875	0.353529	0.57	0.593	0.8272	0.663	0.460236	0.717249	0.659091	0.625	0.756
ens_adv_inception_resnet_v2	ens_adv_inception_resnet_v2	in1k	299	0.37375	M	55.84	M	Convolution	Conventional	1200000	0.804	0.694	0.3	0.422	0.162	0.395	0.491	0.9208	0.839	0.434389	0.429432	0.20737	0.478	0.519	0.7516	0.583	0.411024	0.666539	0.443182	0.526	0.7
ese_vovnet19b_dw	ese_vovnet19b_dw	in1k	224	0.28	S	6.54	S	Convolution	Conventional	1200000	0.775	0.658	0.255	0.375	0.067	0.339	0.437	0.9424	0.868	0.417273	0.399619	0.232355	0.479	0.508	0.7894	0.623	0.351969	0.579716	0.465909	0.505	0.64
ese_vovnet39b	ese_vovnet39b	in1k	224	0.28	S	24.57	S	Convolution	Conventional	1200000	0.799	0.687	0.291	0.411	0.133	0.381	0.477	0.9558	0.89	0.499311	0.434824	0.302311	0.532	0.557	0.8124	0.644	0.422441	0.657318	0.522727	0.562	0.692
fbnetc_100	fbnetc_100.rmsp_in1k	in1k	224	0.28	S	5.57	S	Convolution	Conventional	1200000	0.753	0.631	0.227	0.349	0.041	0.312	0.414	0.932	0.847	0.386976	0.388519	0.191131	0.453	0.486	0.7862	0.588	0.330709	0.570111	0.352273	0.46	0.585
fbnetv3_b	fbnetv3_b.ra2_in1k	in1k	256	0.32	M	8.6	S	Convolution	Conventional	1200000	0.795	0.682	0.286	0.405	0.117	0.373	0.469	0.9512	0.891	0.471375	0.438788	0.292317	0.523	0.55	0.799	0.63	0.387598	0.632731	0.579545	0.557	0.697
fbnetv3_d	fbnetv3_d.ra2_in1k	in1k	256	0.32	M	10.31	S	Convolution	Conventional	1200000	0.802	0.688	0.294	0.415	0.141	0.385	0.48	0.9504	0.89	0.483769	0.444814	0.309806	0.532	0.56	0.8014	0.637	0.389173	0.645025	0.465909	0.534	0.666
fbnetv3_g	fbnetv3_g.ra2_in1k	in1k	288	0.36	M	16.62	S	Convolution	Conventional	1200000	0.823	0.713	0.33	0.455	0.261	0.44	0.535	0.9582	0.902	0.525477	0.476372	0.359775	0.566	0.591	0.8234	0.637	0.43248	0.67307	0.613636	0.589	0.715
gc_efficientnetv2_rw_t	gc_efficientnetv2_rw_t.agc_in1k	in1k	288	0.36	M	13.68	S	Convolution	Conventional	1200000	0.821	0.711	0.327	0.452	0.251	0.435	0.53	0.962	0.917	0.545347	0.479385	0.356652	0.575	0.598	0.8294	0.665	0.455512	0.705724	0.613636	0.61	0.735
gcresnet33ts	gcresnet33ts	in1k	256	0.32	M	19.88	S	Convolution	Conventional	1200000	0.801	0.687	0.293	0.413	0.138	0.383	0.478	0.9532	0.896	0.463506	0.436886	0.292942	0.522	0.548	0.8178	0.641	0.395472	0.621975	0.556818	0.554	0.677
gcresnet50t	gcresnet50t	in1k	256	0.32	M	25.9	S	Convolution	Conventional	1200000	0.805	0.694	0.3	0.423	0.164	0.395	0.491	0.9542	0.893	0.498131	0.453536	0.301686	0.537	0.563	0.8192	0.653	0.425787	0.671149	0.5	0.562	0.686
gcresnext26ts	gcresnext26ts	in1k	256	0.32	M	10.48	S	Convolution	Conventional	1200000	0.784	0.668	0.267	0.39	0.087	0.353	0.45	0.9412	0.877	0.427307	0.394545	0.212992	0.478	0.508	0.7998	0.608	0.368701	0.586247	0.522727	0.521	0.651
gcresnext50ts	gcresnext50ts	in1k	256	0.32	M	15.67	S	Convolution	Conventional	1200000	0.805	0.694	0.3	0.422	0.162	0.395	0.491	0.9522	0.893	0.474916	0.448938	0.284822	0.525	0.551	0.825	0.637	0.420472	0.643104	0.556818	0.564	0.684
gcvit_small.in1k	gcvit_small.in1k	in1k	224	0.28	S	51	S	ViT	Conventional	1200000	0.863	0.693	0.481	0.713	0.67	0.639	0.74	0.97	0.923	0.553	0.491	0.559	0.632	0.652	0.84	0.733	0.367	0.486	0.365	0.488	0.581
gcvit_tiny.in1k	gcvit_tiny.in1k	in1k	224	0.28	S	28	S	ViT	Conventional	1200000	0.856	0.698	0.456	0.687	0.693	0.634	0.741	0.968	0.919	0.528	0.485	0.503	0.609	0.629	0.833	0.728	0.35	0.47	0.311	0.465	0.558
gernet_l	gernet_l	in1k	256	0.32	M	31.08	S	Convolution	Conventional	1200000	0.805	0.694	0.3	0.423	0.163	0.395	0.491	0.957	0.904	0.495573	0.454805	0.292317	0.537	0.561	0.8192	0.645	0.434252	0.668459	0.465909	0.553	0.675
gernet_m	gernet_m	in1k	224	0.28	S	21.14	S	Convolution	Conventional	1200000	0.801	0.688	0.294	0.414	0.141	0.384	0.479	0.9588	0.901	0.507968	0.489692	0.317302	0.554	0.578	0.8302	0.653	0.43189	0.676527	0.545455	0.577	0.695
gernet_s	gernet_s	in1k	224	0.28	S	8.17	S	Convolution	Conventional	1200000	0.766	0.644	0.244	0.363	0.053	0.326	0.426	0.9416	0.881	0.467244	0.447035	0.209244	0.501	0.532	0.7878	0.612	0.402559	0.658855	0.522727	0.549	0.697
ghostnet_100	ghostnet_100	in1k	224	0.28	S	5.18	S	Convolution	Conventional	1200000	0.737	0.615	0.214	0.335	0.032	0.299	0.406	0.9248	0.832	0.410584	0.38059	0.194878	0.455	0.492	0.7594	0.575	0.323031	0.56166	0.397727	0.464	0.611
gluon_inception_v3	gluon_inception_v3	in1k	299	0.37375	M	23.83	S	Convolution	Conventional	1200000	0.797	0.684	0.289	0.408	0.126	0.377	0.473	0.9258	0.845	0.44698	0.422455	0.181761	0.474	0.512	0.7598	0.589	0.394094	0.648867	0.465909	0.524	0.69
gluon_resnet101_v1b	gluon_resnet101_v1b	in1k	224	0.28	S	44.55	S	Convolution	Conventional	1200000	0.778	0.661	0.258	0.381	0.072	0.343	0.441	0.9472	0.899	0.468818	0.431177	0.246096	0.511	0.539	0.8252	0.647	0.418701	0.638878	0.477273	0.545	0.66
gluon_resnet101_v1c	gluon_resnet101_v1c	in1k	224	0.28	S	44.57	S	Convolution	Conventional	1200000	0.78	0.664	0.262	0.386	0.08	0.348	0.446	0.9502	0.89	0.464686	0.431494	0.245472	0.508	0.535	0.8214	0.635	0.395472	0.620438	0.454545	0.526	0.64
gluon_resnet101_v1d	gluon_resnet101_v1d	in1k	224	0.28	S	44.57	S	Convolution	Conventional	1200000	0.799	0.685	0.29	0.41	0.132	0.379	0.474	0.9532	0.913	0.459374	0.460038	0.299188	0.533	0.559	0.8282	0.647	0.427756	0.666539	0.579545	0.58	0.7
gluon_resnet101_v1s	gluon_resnet101_v1s	in1k	224	0.28	S	44.67	S	Convolution	Conventional	1200000	0.796	0.682	0.286	0.406	0.119	0.373	0.469	0.9592	0.906	0.497541	0.458769	0.279825	0.536	0.559	0.8306	0.663	0.434252	0.68229	0.625	0.601	0.724
gluon_resnet152_v1b	gluon_resnet152_v1b	in1k	224	0.28	S	60.19	M	Convolution	Conventional	1200000	0.788	0.672	0.273	0.396	0.097	0.36	0.457	0.953	0.899	0.489868	0.460514	0.246096	0.524	0.55	0.823	0.669	0.420276	0.658087	0.534091	0.57	0.693
gluon_resnet152_v1c	gluon_resnet152_v1c	in1k	224	0.28	S	60.21	M	Convolution	Conventional	1200000	0.793	0.678	0.283	0.403	0.111	0.369	0.465	0.9542	0.908	0.494983	0.460831	0.265459	0.532	0.558	0.8296	0.671	0.435236	0.666539	0.454545	0.557	0.671
gluon_resnet152_v1d	gluon_resnet152_v1d	in1k	224	0.28	S	60.21	M	Convolution	Conventional	1200000	0.806	0.695	0.303	0.426	0.166	0.398	0.494	0.9566	0.91	0.506787	0.468601	0.312305	0.549	0.574	0.8394	0.681	0.459449	0.696504	0.511364	0.587	0.699
gluon_resnet152_v1s	gluon_resnet152_v1s	in1k	224	0.28	S	60.32	M	Convolution	Conventional	1200000	0.805	0.695	0.302	0.425	0.166	0.397	0.493	0.9622	0.908	0.501672	0.456549	0.304809	0.543	0.564	0.8338	0.669	0.448622	0.69612	0.590909	0.601	0.721
gluon_resnet18_v1b	gluon_resnet18_v1b	in1k	224	0.28	S	11.69	S	Convolution	Conventional	1200000	0.657	0.522	0.147	0.262	0.015	0.237	0.361	0.9096	0.82	0.410191	0.370124	0.128045	0.432	0.475	0.7464	0.577	0.313189	0.59393	0.340909	0.456	0.611
gluon_resnet34_v1b	gluon_resnet34_v1b	in1k	224	0.28	S	21.8	S	Convolution	Conventional	1200000	0.724	0.599	0.205	0.325	0.027	0.289	0.399	0.9274	0.852	0.441472	0.398668	0.177389	0.467	0.504	0.7772	0.605	0.370669	0.630426	0.477273	0.521	0.67
gluon_resnet50_v1b	gluon_resnet50_v1b	in1k	224	0.28	S	25.56	S	Convolution	Conventional	1200000	0.751	0.629	0.226	0.348	0.041	0.311	0.414	0.9438	0.878	0.452292	0.422455	0.191755	0.486	0.515	0.8122	0.638	0.396457	0.629274	0.409091	0.518	0.638
gluon_resnet50_v1c	gluon_resnet50_v1c	in1k	224	0.28	S	25.58	S	Convolution	Conventional	1200000	0.759	0.636	0.237	0.356	0.049	0.32	0.422	0.9464	0.883	0.437537	0.422772	0.198626	0.485	0.512	0.8144	0.651	0.376378	0.597772	0.443182	0.517	0.635
gluon_resnet50_v1d	gluon_resnet50_v1d	in1k	224	0.28	S	25.58	S	Convolution	Conventional	1200000	0.78	0.664	0.262	0.386	0.079	0.348	0.446	0.9528	0.886	0.468818	0.442277	0.241724	0.51	0.535	0.8258	0.668	0.402953	0.650788	0.511364	0.558	0.676
gluon_resnet50_v1s	gluon_resnet50_v1s	in1k	224	0.28	S	25.68	S	Convolution	Conventional	1200000	0.777	0.661	0.258	0.38	0.072	0.343	0.441	0.9502	0.886	0.455833	0.430542	0.234853	0.502	0.528	0.814	0.654	0.395276	0.646562	0.579545	0.569	0.699
gluon_resnext101_32x4d	gluon_resnext101_32x4d	in1k	224	0.28	S	44.18	S	Convolution	Conventional	1200000	0.801	0.687	0.293	0.413	0.139	0.383	0.478	0.9554	0.892	0.47531	0.464478	0.284822	0.529	0.554	0.8322	0.664	0.42874	0.689205	0.534091	0.579	0.696
gluon_resnext101_64x4d	gluon_resnext101_64x4d	in1k	224	0.28	S	83.46	M	Convolution	Conventional	1200000	0.806	0.695	0.304	0.426	0.169	0.399	0.495	0.9562	0.903	0.467244	0.457501	0.306059	0.533	0.557	0.8364	0.672	0.42874	0.670765	0.579545	0.588	0.703
gluon_resnext50_32x4d	gluon_resnext50_32x4d	in1k	224	0.28	S	25.03	S	Convolution	Conventional	1200000	0.785	0.669	0.268	0.393	0.09	0.355	0.452	0.9542	0.885	0.450915	0.448462	0.250468	0.509	0.533	0.8194	0.654	0.404921	0.660776	0.5	0.555	0.677
gluon_senet154	gluon_senet154	in1k	224	0.28	S	115.09	L	Convolution	Conventional	1200000	0.812	0.704	0.31	0.434	0.193	0.41	0.505	0.9566	0.896	0.471965	0.423089	0.325422	0.529	0.553	0.8422	0.684	0.409055	0.640799	0.5	0.558	0.663
gluon_seresnext101_32x4d	gluon_seresnext101_32x4d	in1k	224	0.28	S	48.96	S	Convolution	Conventional	1200000	0.809	0.697	0.305	0.428	0.174	0.401	0.496	0.959	0.901	0.50364	0.479543	0.333542	0.554	0.578	0.8354	0.665	0.441535	0.703803	0.522727	0.583	0.698
gluon_seresnext101_64x4d	gluon_seresnext101_64x4d	in1k	224	0.28	S	88.23	M	Convolution	Conventional	1200000	0.811	0.702	0.309	0.432	0.189	0.408	0.503	0.9562	0.908	0.500885	0.483984	0.347908	0.56	0.586	0.8398	0.67	0.447638	0.702267	0.545455	0.591	0.704
gluon_seresnext50_32x4d	gluon_seresnext50_32x4d	in1k	224	0.28	S	27.56	S	Convolution	Conventional	1200000	0.8	0.687	0.293	0.413	0.136	0.382	0.478	0.956	0.893	0.46685	0.45084	0.300437	0.528	0.552	0.8286	0.646	0.41378	0.679985	0.579545	0.58	0.7
gluon_xception65	gluon_xception65	in1k	299	0.37375	M	39.92	S	Convolution	Conventional	1200000	0.805	0.694	0.3	0.423	0.164	0.395	0.491	0.9424	0.874	0.491836	0.457818	0.234853	0.515	0.546	0.8048	0.616	0.43189	0.678064	0.443182	0.542	0.673
gmixer_24_224	gmixer_24_224	in1k	224	0.28	S	24.72	S	MLP	Conventional	1200000	0.795	0.682	0.286	0.406	0.119	0.373	0.469	0.9414	0.876	0.47649	0.399778	0.271081	0.506	0.537	0.8032	0.611	0.384843	0.610065	0.534091	0.535	0.666
gmlp_s16_224	gmlp_s16_224	in1k	224	0.28	S	19.42	S	MLP	Conventional	1200000	0.805	0.695	0.301	0.424	0.165	0.396	0.492	0.9476	0.888	0.481015	0.457977	0.304185	0.533	0.562	0.7988	0.602	0.403346	0.684979	0.613636	0.576	0.721
halo2botnet50ts_256	halo2botnet50ts_256	in1k	256	0.32	M	22.64	S	ViT	Conventional	1200000	0.822	0.713	0.329	0.454	0.256	0.438	0.533	0.9624	0.908	0.467637	0.425785	0.42411	0.556	0.578	0.8548	0.677	0.420276	0.64272	0.568182	0.577	0.675
halonet26t	halonet26t	in1k	256	0.32	M	12.48	S	ViT	Conventional	1200000	0.793	0.678	0.283	0.404	0.111	0.369	0.465	0.9532	0.884	0.422782	0.398351	0.296065	0.5	0.525	0.8114	0.632	0.354921	0.579716	0.545455	0.528	0.651
halonet50ts	halonet50ts	in1k	256	0.32	M	22.73	S	ViT	Conventional	1200000	0.815	0.708	0.315	0.441	0.229	0.423	0.519	0.9626	0.898	0.442062	0.423406	0.397252	0.54	0.561	0.8462	0.672	0.408071	0.629274	0.636364	0.586	0.693
haloregnetz_b	haloregnetz_b	in1k	224	0.28	S	11.68	S	ViT	Conventional	1200000	0.812	0.704	0.311	0.436	0.2	0.413	0.509	0.9586	0.902	0.473736	0.443387	0.325422	0.536	0.559	0.8208	0.649	0.373031	0.660776	0.534091	0.554	0.675
hrnet_w18	hrnet_w18	in1k	384	0.48	M	21.3	S	Convolution	Conventional	1200000	0.768	0.646	0.245	0.365	0.055	0.328	0.427	0.9362	0.884	0.428684	0.40628	0.217989	0.484	0.517	0.7888	0.618	0.355906	0.631963	0.522727	0.532	0.674
hrnet_w18_small	hrnet_w18_small	in1k	384	0.48	M	13.19	S	Convolution	Conventional	1200000	0.652	0.521	0.145	0.262	0.015	0.236	0.362	0.9164	0.834	0.369664	0.366001	0.155528	0.431	0.47	0.7386	0.564	0.290748	0.577027	0.386364	0.455	0.616
hrnet_w18_small_v2	hrnet_w18_small_v2	in1k	384	0.48	M	15.6	S	Convolution	Conventional	1200000	0.724	0.602	0.208	0.326	0.027	0.291	0.402	0.9258	0.854	0.372418	0.379163	0.173641	0.445	0.481	0.773	0.599	0.311811	0.593162	0.397727	0.475	0.614
hrnet_w30	hrnet_w30	in1k	384	0.48	M	37.71	S	Convolution	Conventional	1200000	0.783	0.668	0.266	0.389	0.086	0.352	0.45	0.9488	0.879	0.445996	0.421186	0.272954	0.505	0.532	0.8086	0.649	0.376181	0.64272	0.5	0.542	0.67
hrnet_w32	hrnet_w32	in1k	384	0.48	M	41.23	S	Convolution	Conventional	1200000	0.781	0.665	0.263	0.386	0.08	0.349	0.447	0.9468	0.881	0.429864	0.40628	0.249844	0.492	0.52	0.807	0.666	0.376772	0.636189	0.556818	0.559	0.693
hrnet_w40	hrnet_w40	in1k	384	0.48	M	57.56	M	Convolution	Conventional	1200000	0.786	0.67	0.271	0.395	0.092	0.357	0.454	0.9478	0.887	0.458587	0.418966	0.262336	0.507	0.535	0.8144	0.643	0.397244	0.672685	0.590909	0.576	0.707
hrnet_w44	hrnet_w44	in1k	384	0.48	M	67.06	M	Convolution	Conventional	1200000	0.791	0.675	0.278	0.4	0.103	0.364	0.46	0.9468	0.901	0.43616	0.408817	0.273579	0.505	0.533	0.8126	0.644	0.379724	0.634268	0.534091	0.548	0.674
hrnet_w48	hrnet_w48	in1k	384	0.48	M	77.47	M	Convolution	Conventional	1200000	0.793	0.678	0.283	0.404	0.111	0.369	0.465	0.947	0.89	0.440881	0.410086	0.275453	0.504	0.532	0.8146	0.662	0.400394	0.653477	0.522727	0.56	0.687
hrnet_w64	hrnet_w64	in1k	384	0.48	M	128.06	L	Convolution	Conventional	1200000	0.796	0.683	0.286	0.406	0.12	0.374	0.47	0.9506	0.894	0.452882	0.422455	0.273579	0.511	0.538	0.8252	0.672	0.400394	0.646562	0.568182	0.572	0.693
ig_resnext101_32x16d	ig_resnext101_32x16d	ig1b	224	0.28	S	194.03	L	Convolution	Conventional	1000000000	0.853	0.756	0.424	0.549	0.531	0.565	0.662	0.9766	0.944	0.859138	0.846813	0.654591	0.826	0.846	0.8758	0.76	0.601772	0.873607	0.840909	0.769	0.878
ig_resnext101_32x32d	ig_resnext101_32x32d	ig1b	224	0.28	S	468.53	L	Convolution	Conventional	1000000000	0.858	0.761	0.458	0.595	0.58	0.599	0.698	0.9792	0.945	0.866811	0.859499	0.702686	0.843	0.861	0.8792	0.778	0.615157	0.884748	0.818182	0.774	0.88
ig_resnext101_32x8d	ig_resnext101_32x8d	ig1b	224	0.28	S	88.79	M	Convolution	Conventional	1000000000	0.845	0.744	0.393	0.522	0.453	0.528	0.625	0.9734	0.94	0.829825	0.818427	0.560899	0.787	0.809	0.8618	0.743	0.600787	0.86554	0.727273	0.734	0.852
inception_resnet_v2	inception_resnet_v2	in1k	299	0.37375	M	55.84	M	Convolution	Conventional	1200000	0.805	0.695	0.302	0.425	0.166	0.397	0.493	0.9202	0.84	0.474916	0.449413	0.212992	0.494	0.537	0.7618	0.581	0.419291	0.664618	0.352273	0.504	0.662
inception_v3	inception_v3	in1k	299	0.37375	M	23.83	S	Convolution	Conventional	1200000	0.789	0.674	0.275	0.397	0.1	0.362	0.459	0.9058	0.833	0.460948	0.400888	0.178014	0.468	0.517	0.7532	0.584	0.389567	0.610449	0.363636	0.487	0.647
inception_v4	inception_v4	in1k	299	0.37375	M	42.68	S	Convolution	Conventional	1200000	0.808	0.697	0.305	0.428	0.173	0.401	0.496	0.916	0.838	0.453472	0.410879	0.202998	0.476	0.52	0.7648	0.611	0.399606	0.651556	0.363636	0.506	0.662
jx_nest_base	jx_nest_base	in1k	224	0.28	S	67.72	M	ViT	Conventional	1200000	0.836	0.731	0.359	0.485	0.361	0.484	0.579	0.9686	0.925	0.512493	0.471931	0.520924	0.608	0.628	0.859	0.697	0.462205	0.686516	0.693182	0.635	0.739
jx_nest_small	jx_nest_small	in1k	224	0.28	S	38.35	S	ViT	Conventional	1200000	0.83	0.725	0.347	0.471	0.323	0.467	0.563	0.9668	0.917	0.510722	0.469077	0.493442	0.598	0.619	0.8578	0.692	0.473819	0.689973	0.715909	0.643	0.75
jx_nest_tiny	jx_nest_tiny	in1k	224	0.28	S	17.06	S	ViT	Conventional	1200000	0.815	0.708	0.315	0.441	0.232	0.424	0.52	0.9594	0.909	0.480031	0.441326	0.401624	0.558	0.582	0.831	0.681	0.453937	0.664234	0.625	0.606	0.729
lambda_resnet26rpt_256	lambda_resnet26rpt_256	in1k	256	0.32	M	10.99	S	Convolution	Conventional	1200000	0.791	0.675	0.277	0.398	0.103	0.363	0.459	0.9534	0.894	0.439504	0.407231	0.286071	0.507	0.532	0.807	0.628	0.357677	0.577795	0.545455	0.527	0.653
lambda_resnet26t	lambda_resnet26t	in1k	256	0.32	M	10.96	S	Convolution	Conventional	1200000	0.793	0.679	0.283	0.404	0.114	0.37	0.467	0.944	0.886	0.453669	0.412147	0.271705	0.506	0.536	0.8022	0.627	0.35689	0.609297	0.545455	0.535	0.667
lambda_resnet50ts	lambda_resnet50ts	in1k	256	0.32	M	21.54	S	Convolution	Conventional	1200000	0.811	0.703	0.31	0.433	0.191	0.409	0.504	0.9526	0.894	0.468818	0.417063	0.321049	0.525	0.551	0.8252	0.63	0.412205	0.617749	0.522727	0.546	0.662
lamhalobotnet50ts_256	lamhalobotnet50ts_256	in1k	256	0.32	M	22.57	S	Convolution	Conventional	1200000	0.817	0.709	0.319	0.444	0.236	0.427	0.523	0.962	0.893	0.473933	0.43419	0.420362	0.555	0.577	0.8388	0.672	0.406102	0.640799	0.693182	0.603	0.719
lcnet_050	lcnet_050.ra2_in1k	in1k	224	0.28	S	1.88	S	Convolution	Conventional	1200000	0.688	0.558	0.167	0.281	0.018	0.256	0.372	0.8636	0.747	0.309463	0.330162	0.106184	0.373	0.432	0.6472	0.441	0.225787	0.495582	0.431818	0.399	0.617
lcnet_075	lcnet_075.ra2_in1k	in1k	224	0.28	S	2.36	S	Convolution	Conventional	1200000	0.716	0.583	0.193	0.304	0.023	0.276	0.385	0.8952	0.804	0.366909	0.351887	0.131168	0.413	0.461	0.7124	0.526	0.279921	0.521706	0.375	0.426	0.598
lcnet_100	lcnet_100.ra2_in1k	in1k	224	0.28	S	2.95	S	Convolution	Conventional	1200000	0.723	0.594	0.204	0.322	0.026	0.287	0.397	0.9152	0.833	0.39701	0.380273	0.154903	0.441	0.482	0.75	0.563	0.3	0.56166	0.352273	0.444	0.592
legacy_seresnet101	legacy_seresnet101	in1k	224	0.28	S	49.33	S	Convolution	Conventional	1200000	0.782	0.667	0.265	0.388	0.085	0.351	0.449	0.9452	0.893	0.403305	0.403901	0.255465	0.489	0.517	0.8102	0.648	0.361024	0.626969	0.443182	0.52	0.642
legacy_seresnet152	legacy_seresnet152	in1k	224	0.28	S	66.82	M	Convolution	Conventional	1200000	0.787	0.671	0.272	0.395	0.093	0.358	0.455	0.9472	0.884	0.431635	0.415002	0.266084	0.499	0.527	0.8174	0.654	0.388386	0.636189	0.488636	0.542	0.663
legacy_seresnet18	legacy_seresnet18	in1k	224	0.28	S	11.78	S	Convolution	Conventional	1200000	0.718	0.589	0.2	0.305	0.025	0.28	0.39	0.9166	0.832	0.399961	0.377894	0.131793	0.435	0.475	0.7458	0.56	0.319291	0.588936	0.443182	0.478	0.641
legacy_seresnet34	legacy_seresnet34	in1k	224	0.28	S	21.96	S	Convolution	Conventional	1200000	0.74	0.619	0.216	0.335	0.033	0.301	0.407	0.9264	0.852	0.42711	0.391373	0.185509	0.464	0.501	0.7886	0.614	0.345866	0.604687	0.431818	0.499	0.633
legacy_seresnet50	legacy_seresnet50	in1k	224	0.28	S	28.09	S	Convolution	Conventional	1200000	0.771	0.653	0.251	0.37	0.062	0.334	0.433	0.9414	0.877	0.383435	0.395972	0.239225	0.474	0.504	0.8004	0.626	0.353543	0.603919	0.465909	0.512	0.64
legacy_seresnext26_32x4d	legacy_seresnext26_32x4d	in1k	224	0.28	S	16.79	S	Convolution	Conventional	1200000	0.774	0.656	0.254	0.372	0.066	0.337	0.435	0.9424	0.876	0.394452	0.37837	0.212367	0.465	0.493	0.797	0.622	0.335236	0.575106	0.556818	0.522	0.655
levit_128	levit_128	in1k	224	0.28	S	9.21	S	ViT	Conventional	1200000	0.794	0.679	0.284	0.404	0.114	0.37	0.466	0.9502	0.876	0.431241	0.419442	0.298563	0.506	0.533	0.8028	0.619	0.38563	0.650403	0.568182	0.556	0.693
levit_128s	levit_128s	in1k	224	0.28	S	7.78	S	ViT	Conventional	1200000	0.783	0.668	0.266	0.39	0.087	0.353	0.451	0.939	0.858	0.411961	0.395021	0.247345	0.478	0.509	0.7816	0.597	0.348425	0.623511	0.511364	0.52	0.665
levit_192	levit_192	in1k	224	0.28	S	10.95	S	ViT	Conventional	1200000	0.803	0.691	0.296	0.416	0.149	0.388	0.483	0.9584	0.892	0.451308	0.436727	0.337289	0.529	0.552	0.8204	0.624	0.399409	0.64733	0.602273	0.568	0.692
levit_256	levit_256	in1k	224	0.28	S	18.89	S	ViT	Conventional	1200000	0.811	0.703	0.31	0.433	0.192	0.41	0.506	0.96	0.912	0.453079	0.439264	0.371643	0.544	0.567	0.8418	0.666	0.399409	0.666923	0.579545	0.578	0.687
levit_384	levit_384	in1k	224	0.28	S	39.13	S	ViT	Conventional	1200000	0.816	0.709	0.317	0.442	0.234	0.426	0.522	0.9658	0.919	0.499115	0.484618	0.437227	0.585	0.606	0.8468	0.668	0.433858	0.699577	0.636364	0.609	0.719
mixer_b16_224	mixer_b16_224	in1k	224	0.28	S	59.88	M	MLP	Conventional	1200000	0.782	0.667	0.266	0.389	0.086	0.352	0.45	0.9228	0.84	0.393862	0.364256	0.205497	0.451	0.489	0.741	0.521	0.345866	0.57549	0.340909	0.446	0.602
mixer_b16_224_miil	mixer_b16_224_miil	in21k	224	0.28	S	59.88	M	MLP	Conventional	14200000	0.811	0.702	0.31	0.433	0.19	0.409	0.504	0.6036	0.483	0.220342	0.271012	0.126171	0.275	0.456	0.4	0.252	0.21378	0.40146	0.340909	0.302	0.755
mixer_l16_224	mixer_l16_224	in1k	224	0.28	S	208.2	L	MLP	Conventional	1200000	0.769	0.65	0.248	0.367	0.059	0.331	0.43	0.8936	0.77	0.326579	0.300507	0.154903	0.388	0.434	0.6904	0.402	0.236811	0.453323	0.363636	0.364	0.527
mixnet_l	mixnet_l.ft_in1k	in1k	224	0.28	S	7.33	S	Convolution	Conventional	1200000	0.784	0.669	0.268	0.392	0.089	0.355	0.453	0.9518	0.888	0.444816	0.424516	0.253592	0.503	0.528	0.8202	0.629	0.372835	0.631579	0.454545	0.522	0.636
mixnet_m	mixnet_m.ft_in1k	in1k	224	0.28	S	5.01	S	Convolution	Conventional	1200000	0.774	0.657	0.255	0.373	0.066	0.338	0.437	0.9418	0.866	0.429274	0.399302	0.229856	0.481	0.511	0.8018	0.613	0.340354	0.596619	0.420455	0.493	0.615
mixnet_s	mixnet_s.ft_in1k	in1k	224	0.28	S	4.13	S	Convolution	Conventional	1200000	0.76	0.637	0.238	0.358	0.049	0.321	0.422	0.9356	0.858	0.39701	0.384396	0.213616	0.463	0.495	0.7828	0.6	0.324606	0.573569	0.420455	0.48	0.613
mixnet_xl	mixnet_xl.ra_in1k	in1k	224	0.28	S	11.9	S	Convolution	Conventional	1200000	0.798	0.684	0.289	0.409	0.131	0.378	0.474	0.9554	0.895	0.453276	0.424041	0.29669	0.517	0.541	0.826	0.663	0.394488	0.631963	0.534091	0.556	0.673
mnasnet_100	mnasnet_100.rmsp_in1k	in1k	224	0.28	S	4.38	S	Convolution	Conventional	1200000	0.733	0.612	0.213	0.332	0.031	0.297	0.405	0.9338	0.829	0.381074	0.384872	0.174266	0.442	0.473	0.7728	0.582	0.330118	0.573569	0.477273	0.491	0.635
mnasnet_small	mnasnet_small.lamb_in1k	in1k	224	0.28	S	2.03	S	Convolution	Conventional	1200000	0.679	0.554	0.165	0.279	0.018	0.254	0.374	0.8806	0.768	0.353925	0.354583	0.124297	0.4	0.454	0.6822	0.491	0.261614	0.533999	0.318182	0.401	0.588
mobilenetv2_050	mobilenetv2_050.lamb_in1k	in1k	224	0.28	S	1.97	S	Convolution	Conventional	1200000	0.66	0.531	0.15	0.263	0.016	0.24	0.364	0.8812	0.764	0.366713	0.348081	0.12055	0.4	0.454	0.6728	0.473	0.247638	0.517096	0.375	0.403	0.599
mobilenetv2_100	mobilenetv2_100.ra_in1k	in1k	224	0.28	S	3.5	S	Convolution	Conventional	1200000	0.711	0.582	0.182	0.296	0.021	0.27	0.38	0.9204	0.84	0.367106	0.378211	0.158651	0.436	0.474	0.756	0.567	0.312992	0.556281	0.454545	0.473	0.626
mobilenetv2_110d	mobilenetv2_110d.ra_in1k	in1k	224	0.28	S	4.52	S	Convolution	Conventional	1200000	0.734	0.613	0.213	0.334	0.032	0.298	0.406	0.9286	0.86	0.408814	0.398985	0.187383	0.464	0.5	0.7774	0.585	0.344291	0.606224	0.488636	0.506	0.651
mobilenetv2_120d	mobilenetv2_120d.ra_in1k	in1k	224	0.28	S	5.83	S	Convolution	Conventional	1200000	0.755	0.633	0.231	0.351	0.045	0.315	0.417	0.9444	0.869	0.436947	0.406755	0.210493	0.481	0.509	0.7968	0.625	0.366535	0.606608	0.431818	0.507	0.636
mobilenetv2_140	mobilenetv2_140.ra_in1k	in1k	224	0.28	S	6.11	S	Convolution	Conventional	1200000	0.746	0.625	0.219	0.338	0.037	0.305	0.409	0.9378	0.862	0.405076	0.407073	0.186134	0.465	0.496	0.7928	0.612	0.345472	0.59854	0.420455	0.494	0.623
mobilenetv3_large_100	mobilenetv3_large_100.ra_in1k	in1k	224	0.28	S	5.48	S	Convolution	Conventional	1200000	0.763	0.642	0.24	0.36	0.051	0.323	0.423	0.935	0.863	0.432815	0.393911	0.207995	0.474	0.507	0.7858	0.583	0.346654	0.574721	0.477273	0.495	0.63
mobilenetv3_rw	mobilenetv3_rw.rmsp_in1k	in1k	224	0.28	S	5.48	S	Convolution	Conventional	1200000	0.76	0.637	0.237	0.358	0.049	0.32	0.421	0.9322	0.861	0.412355	0.405011	0.220487	0.475	0.51	0.7846	0.595	0.317717	0.587015	0.409091	0.477	0.608
mobilenetv3_small_050	mobilenetv3_small_050.lamb_in1k	in1k	224	0.28	S	1.59	S	Convolution	Conventional	1200000	0.688	0.56	0.167	0.284	0.018	0.257	0.374	0.8206	0.697	0.273657	0.285442	0.104934	0.34	0.414	0.5958	0.385	0.181102	0.406454	0.329545	0.326	0.547
mobilenetv3_small_075	mobilenetv3_small_075.lamb_in1k	in1k	224	0.28	S	2.04	S	Convolution	Conventional	1200000	0.716	0.583	0.186	0.297	0.023	0.272	0.38	0.8744	0.765	0.322644	0.320806	0.126796	0.384	0.439	0.67	0.467	0.243504	0.499808	0.397727	0.402	0.6
mobilenetv3_small_100	mobilenetv3_small_100.lamb_in1k	in1k	224	0.28	S	2.54	S	Convolution	Conventional	1200000	0.701	0.572	0.175	0.289	0.02	0.264	0.377	0.8852	0.77	0.348613	0.347605	0.143036	0.402	0.454	0.6996	0.492	0.27126	0.525163	0.329545	0.404	0.577
nf_regnet_b1	nf_regnet_b1	in1k	288	0.36	M	10.22	S	Convolution	Conventional	1200000	0.798	0.684	0.289	0.409	0.129	0.378	0.474	0.9442	0.874	0.49636	0.451633	0.246096	0.517	0.548	0.8036	0.611	0.402559	0.65194	0.5	0.541	0.673
nf_resnet50	nf_resnet50	in1k	288	0.36	M	25.56	S	Convolution	Conventional	1200000	0.795	0.682	0.286	0.405	0.118	0.373	0.469	0.952	0.884	0.490065	0.468601	0.254841	0.524	0.55	0.8172	0.651	0.413976	0.67038	0.534091	0.567	0.694
nfnet_l0	nfnet_l0	in1k	288	0.36	M	35.07	S	Convolution	Conventional	1200000	0.823	0.714	0.33	0.456	0.262	0.441	0.536	0.965	0.919	0.558528	0.487472	0.403498	0.592	0.613	0.8418	0.667	0.466142	0.709182	0.636364	0.62	0.737
pit_b_224	pit_b_224	in1k	224	0.28	S	73.76	M	ViT	Conventional	1200000	0.832	0.726	0.35	0.476	0.332	0.471	0.566	0.9648	0.899	0.498721	0.463368	0.490943	0.588	0.609	0.8532	0.677	0.433071	0.658855	0.647727	0.604	0.708
pit_b_distilled_224	pit_b_distilled_224	in1k	224	0.28	S	74.79	M	ViT	Conventional	1200000	0.835	0.731	0.358	0.484	0.356	0.482	0.577	0.9726	0.932	0.570136	0.539962	0.546533	0.647	0.665	0.8642	0.709	0.500591	0.752977	0.761364	0.681	0.788
pit_s_224	pit_s_224	in1k	224	0.28	S	23.46	S	ViT	Conventional	1200000	0.814	0.705	0.313	0.438	0.211	0.417	0.512	0.9608	0.908	0.512493	0.460831	0.405996	0.572	0.595	0.826	0.644	0.433071	0.672301	0.613636	0.591	0.715
pit_s_distilled_224	pit_s_distilled_224	in1k	224	0.28	S	24.04	S	ViT	Conventional	1200000	0.815	0.706	0.313	0.439	0.224	0.421	0.517	0.962	0.913	0.550069	0.510466	0.420987	0.599	0.623	0.8324	0.688	0.456299	0.711871	0.625	0.62	0.745
pit_ti_224	pit_ti_224	in1k	224	0.28	S	4.85	S	ViT	Conventional	1200000	0.771	0.652	0.25	0.369	0.061	0.333	0.432	0.923	0.849	0.427307	0.392801	0.217989	0.472	0.511	0.7444	0.576	0.316142	0.590088	0.556818	0.51	0.685
pit_ti_distilled_224	pit_ti_distilled_224	in1k	224	0.28	S	5.1	S	ViT	Conventional	1200000	0.774	0.657	0.254	0.372	0.066	0.337	0.435	0.9308	0.858	0.460948	0.422455	0.234229	0.494	0.531	0.7626	0.596	0.352362	0.641567	0.534091	0.531	0.696
pit_xs_224	pit_xs_224	in1k	224	0.28	S	10.62	S	ViT	Conventional	1200000	0.797	0.684	0.289	0.408	0.128	0.377	0.473	0.9498	0.889	0.473343	0.428005	0.313554	0.526	0.554	0.7924	0.634	0.366339	0.630042	0.545455	0.544	0.687
pit_xs_distilled_224	pit_xs_distilled_224	in1k	224	0.28	S	11	S	ViT	Conventional	1200000	0.799	0.686	0.29	0.41	0.133	0.38	0.476	0.9522	0.885	0.51387	0.471931	0.332917	0.551	0.579	0.8048	0.643	0.417913	0.683826	0.647727	0.598	0.743
pnasnet5large	pnasnet5large	in1k	331	0.41375	M	86.06	M	Convolution	Conventional	1200000	0.816	0.708	0.316	0.441	0.233	0.425	0.521	0.9004	0.796	0.345072	0.391532	0.168645	0.425	0.472	0.6992	0.541	0.320866	0.582021	0.295455	0.435	0.622
poolformer_m36	poolformer_m36	in1k	224	0.28	S	56.17	M	ViT	Conventional	1200000	0.815	0.707	0.314	0.44	0.225	0.422	0.518	0.9646	0.914	0.474129	0.460355	0.432854	0.57	0.591	0.8472	0.684	0.424409	0.668459	0.636364	0.603	0.712
poolformer_m48	poolformer_m48	in1k	224	0.28	S	73.47	M	ViT	Conventional	1200000	0.818	0.709	0.322	0.447	0.24	0.43	0.526	0.9658	0.917	0.487507	0.460514	0.467208	0.583	0.604	0.8498	0.695	0.429134	0.662697	0.636364	0.606	0.713
poolformer_s12	poolformer_s12	in1k	224	0.28	S	11.92	S	ViT	Conventional	1200000	0.773	0.656	0.254	0.372	0.066	0.337	0.436	0.943	0.879	0.444816	0.429749	0.243598	0.499	0.529	0.7888	0.631	0.365157	0.627353	0.534091	0.539	0.683
poolformer_s24	poolformer_s24	in1k	224	0.28	S	21.39	S	ViT	Conventional	1200000	0.802	0.689	0.294	0.415	0.143	0.385	0.48	0.9554	0.902	0.46744	0.442277	0.343535	0.539	0.564	0.8226	0.654	0.409646	0.642336	0.602273	0.577	0.701
poolformer_s36	poolformer_s36	in1k	224	0.28	S	30.86	S	ViT	Conventional	1200000	0.81	0.701	0.309	0.431	0.184	0.406	0.501	0.9588	0.911	0.467637	0.444656	0.402873	0.557	0.581	0.8372	0.669	0.416929	0.66577	0.613636	0.591	0.706
regnetv_040	regnetv_040	in1k	288	0.36	M	20.64	S	RegNet	Conventional	1200000	0.829	0.724	0.346	0.469	0.313	0.463	0.559	0.9662	0.916	0.520952	0.461624	0.425359	0.581	0.601	0.848	0.7	0.432087	0.67307	0.670455	0.619	0.73
regnetv_064	regnetv_064	in1k	288	0.36	M	30.58	S	RegNet	Conventional	1200000	0.832	0.728	0.351	0.478	0.34	0.474	0.57	0.9678	0.923	0.529018	0.494133	0.469082	0.604	0.624	0.8512	0.691	0.448622	0.711487	0.670455	0.63	0.74
regnetx_002	regnetx_002	in1k	224	0.28	S	2.68	S	RegNet	Conventional	1200000	0.631	0.5	0.143	0.255	0.014	0.228	0.361	0.8944	0.798	0.343695	0.326832	0.124297	0.398	0.445	0.7102	0.523	0.274213	0.547445	0.477273	0.455	0.641
regnetx_004	regnetx_004	in1k	224	0.28	S	5.16	S	RegNet	Conventional	1200000	0.699	0.572	0.173	0.287	0.019	0.263	0.376	0.9142	0.829	0.396616	0.358865	0.154279	0.435	0.476	0.748	0.565	0.312795	0.580868	0.420455	0.47	0.628
regnetx_006	regnetx_006	in1k	224	0.28	S	6.2	S	RegNet	Conventional	1200000	0.721	0.59	0.201	0.308	0.025	0.281	0.39	0.922	0.848	0.38855	0.36267	0.175515	0.444	0.482	0.7666	0.582	0.306299	0.583557	0.397727	0.467	0.609
regnetx_008	regnetx_008	in1k	224	0.28	S	7.26	S	RegNet	Conventional	1200000	0.724	0.6	0.205	0.325	0.027	0.289	0.399	0.9282	0.861	0.392091	0.368379	0.164897	0.447	0.482	0.778	0.598	0.342913	0.600845	0.465909	0.502	0.645
regnetx_016	regnetx_016	in1k	224	0.28	S	9.19	S	RegNet	Conventional	1200000	0.745	0.625	0.217	0.338	0.036	0.304	0.408	0.9444	0.867	0.446587	0.400412	0.178014	0.473	0.501	0.805	0.613	0.364567	0.627353	0.443182	0.512	0.636
regnetx_032	regnetx_032	in1k	224	0.28	S	15.3	S	RegNet	Conventional	1200000	0.758	0.636	0.237	0.356	0.049	0.32	0.422	0.9464	0.883	0.452489	0.416112	0.220487	0.493	0.521	0.8144	0.649	0.385039	0.655013	0.579545	0.567	0.696
regnetx_040	regnetx_040	in1k	224	0.28	S	22.12	S	RegNet	Conventional	1200000	0.769	0.651	0.249	0.368	0.06	0.332	0.432	0.9474	0.879	0.456227	0.426102	0.229232	0.498	0.526	0.8194	0.634	0.390748	0.667691	0.534091	0.557	0.68
regnetx_064	regnetx_064	in1k	224	0.28	S	26.21	S	RegNet	Conventional	1200000	0.779	0.661	0.259	0.382	0.073	0.344	0.442	0.9552	0.894	0.458784	0.41183	0.243598	0.502	0.526	0.8168	0.661	0.377756	0.639647	0.431818	0.528	0.646
regnetx_080	regnetx_080	in1k	224	0.28	S	39.57	S	RegNet	Conventional	1200000	0.771	0.654	0.253	0.37	0.063	0.335	0.435	0.9486	0.89	0.461342	0.413892	0.241099	0.502	0.529	0.8248	0.657	0.401575	0.646946	0.386364	0.523	0.634
regnetx_120	regnetx_120	in1k	224	0.28	S	46.11	S	RegNet	Conventional	1200000	0.785	0.67	0.27	0.394	0.092	0.357	0.455	0.9526	0.882	0.452882	0.413892	0.248595	0.499	0.524	0.8254	0.664	0.394291	0.651556	0.511364	0.555	0.672
regnetx_160	regnetx_160	in1k	224	0.28	S	54.28	M	RegNet	Conventional	1200000	0.79	0.675	0.276	0.398	0.101	0.363	0.459	0.9526	0.906	0.449144	0.417697	0.265459	0.51	0.535	0.8306	0.659	0.409646	0.651172	0.443182	0.541	0.651
regnetx_320	regnetx_320	in1k	224	0.28	S	107.81	L	RegNet	Conventional	1200000	0.799	0.686	0.291	0.411	0.133	0.38	0.476	0.9546	0.904	0.454063	0.427054	0.283573	0.517	0.542	0.834	0.662	0.410039	0.649251	0.511364	0.558	0.669
regnety_002	regnety_002	in1k	224	0.28	S	3.16	S	RegNet	Conventional	1200000	0.712	0.582	0.183	0.296	0.022	0.271	0.381	0.9046	0.8	0.341727	0.341897	0.154903	0.41	0.453	0.734	0.527	0.287598	0.568191	0.465909	0.462	0.629
regnety_004	regnety_004	in1k	224	0.28	S	4.34	S	RegNet	Conventional	1200000	0.734	0.614	0.214	0.334	0.032	0.299	0.407	0.928	0.827	0.377533	0.364573	0.169894	0.435	0.469	0.7582	0.58	0.304921	0.577411	0.420455	0.471	0.621
regnety_006	regnety_006	in1k	224	0.28	S	6.06	S	RegNet	Conventional	1200000	0.74	0.619	0.216	0.335	0.035	0.301	0.407	0.933	0.855	0.403305	0.378211	0.193004	0.457	0.49	0.7858	0.593	0.318701	0.595467	0.454545	0.49	0.624
regnety_008	regnety_008	in1k	224	0.28	S	6.26	S	RegNet	Conventional	1200000	0.748	0.627	0.22	0.343	0.038	0.307	0.41	0.9348	0.865	0.404486	0.387885	0.193629	0.463	0.495	0.7942	0.608	0.33189	0.61698	0.443182	0.5	0.63
regnety_016	regnety_016	in1k	224	0.28	S	11.2	S	RegNet	Conventional	1200000	0.768	0.648	0.247	0.366	0.057	0.33	0.43	0.942	0.868	0.430258	0.396289	0.230481	0.481	0.511	0.8104	0.634	0.365157	0.640031	0.477273	0.529	0.653
regnety_032	regnety_032	in1k	288	0.36	M	19.44	S	RegNet	Conventional	1200000	0.823	0.714	0.33	0.455	0.262	0.44	0.535	0.9666	0.909	0.527838	0.491912	0.394753	0.581	0.601	0.8414	0.691	0.443307	0.691126	0.625	0.613	0.729
regnety_040	regnety_040	in1k	288	0.36	M	20.65	S	RegNet	Conventional	1200000	0.828	0.723	0.343	0.467	0.306	0.46	0.556	0.9634	0.911	0.50541	0.444339	0.412242	0.568	0.59	0.8454	0.702	0.440551	0.657318	0.556818	0.589	0.697
regnety_064	regnety_064	in1k	288	0.36	M	30.58	S	RegNet	Conventional	1200000	0.837	0.733	0.363	0.489	0.37	0.489	0.584	0.9652	0.918	0.520165	0.441167	0.466583	0.586	0.607	0.8508	0.693	0.436417	0.650403	0.636364	0.604	0.71
regnety_080	regnety_080	in1k	288	0.36	M	39.18	S	RegNet	Conventional	1200000	0.835	0.731	0.357	0.483	0.356	0.482	0.577	0.9694	0.93	0.528035	0.486521	0.474079	0.605	0.624	0.8584	0.697	0.461417	0.703419	0.636364	0.625	0.728
regnety_120	regnety_120	in1k	224	0.28	S	51.82	M	RegNet	Conventional	1200000	0.797	0.683	0.288	0.407	0.124	0.376	0.472	0.9564	0.901	0.44757	0.415794	0.294816	0.515	0.538	0.832	0.656	0.380709	0.634268	0.522727	0.548	0.659
regnety_160	regnety_160	in1k	288	0.36	M	83.59	M	RegNet	Conventional	1200000	0.837	0.733	0.361	0.486	0.368	0.487	0.582	0.9678	0.922	0.543577	0.503647	0.481574	0.613	0.633	0.8452	0.689	0.45	0.713408	0.636364	0.622	0.736
regnety_320	regnety_320	in1k	224	0.28	S	145.05	L	RegNet	Conventional	1200000	0.804	0.693	0.299	0.42	0.157	0.392	0.488	0.957	0.903	0.465867	0.4196	0.318551	0.527	0.551	0.8402	0.687	0.401378	0.628121	0.568182	0.571	0.68
regnetz_040	regnetz_040	in1k	320	0.4	M	27.12	S	RegNet	Conventional	1200000	0.838	0.735	0.366	0.495	0.387	0.496	0.592	0.9684	0.91	0.566791	0.510308	0.44722	0.609	0.629	0.8472	0.691	0.468504	0.733	0.647727	0.635	0.75
regnetz_040h	regnetz_040h	in1k	320	0.4	M	28.94	S	RegNet	Conventional	1200000	0.84	0.738	0.371	0.499	0.4	0.502	0.598	0.9688	0.917	0.585284	0.531874	0.461587	0.624	0.644	0.848	0.683	0.472244	0.744526	0.647727	0.637	0.751
regnetz_b16	regnetz_b16	in1k	288	0.36	M	9.72	S	RegNet	Conventional	1200000	0.814	0.705	0.312	0.437	0.209	0.416	0.511	0.927	0.865	0.311824	0.383603	0.276702	0.459	0.495	0.7842	0.621	0.327559	0.615828	0.409091	0.493	0.629
regnetz_c16	regnetz_c16	in1k	320	0.4	M	13.46	S	RegNet	Conventional	1200000	0.825	0.718	0.336	0.46	0.289	0.451	0.547	0.7162	0.64	0.338776	0.388995	0.241724	0.402	0.561	0.5124	0.374	0.21752	0.524395	0.329545	0.361	0.705
regnetz_c16_evos	regnetz_c16_evos	in1k	320	0.4	M	13.49	S	RegNet	Conventional	1200000	0.829	0.724	0.346	0.47	0.315	0.464	0.56	0.958	0.913	0.54338	0.482398	0.373517	0.578	0.603	0.8226	0.67	0.452756	0.699577	0.602273	0.606	0.737
regnetz_d32	regnetz_d32	in1k	320	0.4	M	27.58	S	RegNet	Conventional	1200000	0.838	0.734	0.363	0.491	0.371	0.49	0.585	0.964	0.909	0.600236	0.544244	0.422236	0.619	0.642	0.837	0.673	0.495276	0.759124	0.602273	0.632	0.755
regnetz_d8	regnetz_d8	in1k	320	0.4	M	23.37	S	RegNet	Conventional	1200000	0.84	0.737	0.37	0.498	0.399	0.501	0.596	0.961	0.907	0.575251	0.517127	0.401624	0.6	0.624	0.8318	0.675	0.47874	0.741068	0.590909	0.621	0.747
regnetz_d8_evos	regnetz_d8_evos	in1k	320	0.4	M	23.46	S	RegNet	Conventional	1200000	0.84	0.738	0.371	0.5	0.401	0.503	0.599	0.963	0.912	0.578005	0.503806	0.443473	0.609	0.632	0.8486	0.691	0.472047	0.711487	0.556818	0.608	0.716
regnetz_e8	regnetz_e8	in1k	320	0.4	M	57.7	M	RegNet	Conventional	1200000	0.849	0.749	0.4	0.533	0.478	0.54	0.636	0.9654	0.925	0.629746	0.550428	0.472205	0.644	0.667	0.8448	0.696	0.512008	0.786016	0.602273	0.649	0.768
repvgg_a2	repvgg_a2	in1k	224	0.28	S	28.21	S	Convolution	Conventional	1200000	0.75	0.628	0.224	0.346	0.039	0.309	0.412	0.9378	0.868	0.422979	0.408024	0.187383	0.472	0.503	0.7926	0.624	0.367126	0.640031	0.5	0.533	0.672
repvgg_b0	repvgg_b0	in1k	224	0.28	S	15.82	S	Convolution	Conventional	1200000	0.721	0.59	0.202	0.316	0.025	0.283	0.393	0.9302	0.858	0.392878	0.393435	0.179263	0.456	0.49	0.7772	0.617	0.342913	0.622359	0.465909	0.512	0.659
repvgg_b1	repvgg_b1	in1k	224	0.28	S	57.42	M	Convolution	Conventional	1200000	0.773	0.656	0.254	0.371	0.065	0.337	0.436	0.9468	0.885	0.43675	0.426578	0.227983	0.494	0.522	0.8128	0.653	0.401181	0.655013	0.511364	0.555	0.683
repvgg_b1g4	repvgg_b1g4	in1k	224	0.28	S	39.97	S	Convolution	Conventional	1200000	0.765	0.644	0.241	0.362	0.053	0.325	0.425	0.942	0.872	0.444226	0.423406	0.212992	0.488	0.518	0.804	0.637	0.386417	0.641183	0.431818	0.524	0.652
repvgg_b2	repvgg_b2	in1k	224	0.28	S	89.02	M	Convolution	Conventional	1200000	0.782	0.666	0.265	0.388	0.084	0.351	0.449	0.9496	0.891	0.446587	0.437044	0.257339	0.508	0.535	0.8214	0.649	0.39626	0.648483	0.568182	0.565	0.688
repvgg_b2g4	repvgg_b2g4	in1k	224	0.28	S	61.76	M	Convolution	Conventional	1200000	0.799	0.687	0.292	0.413	0.134	0.382	0.478	0.9532	0.896	0.529805	0.50111	0.305434	0.558	0.585	0.8174	0.667	0.462795	0.714176	0.522727	0.592	0.724
repvgg_b3	repvgg_b3	in1k	224	0.28	S	123.09	L	Convolution	Conventional	1200000	0.811	0.703	0.31	0.433	0.191	0.409	0.504	0.9576	0.908	0.530395	0.513162	0.365397	0.579	0.605	0.8296	0.688	0.468701	0.70995	0.568182	0.609	0.734
repvgg_b3g4	repvgg_b3g4	in1k	224	0.28	S	83.83	M	Convolution	Conventional	1200000	0.804	0.694	0.3	0.422	0.162	0.395	0.491	0.9532	0.912	0.53315	0.514906	0.334791	0.574	0.602	0.8286	0.672	0.461811	0.698425	0.545455	0.594	0.717
res2net101_26w_4s	res2net101_26w_4s	in1k	224	0.28	S	45.21	S	Convolution	Conventional	1200000	0.787	0.671	0.272	0.395	0.095	0.358	0.455	0.9484	0.891	0.419831	0.399778	0.234853	0.486	0.512	0.8188	0.641	0.391142	0.620054	0.443182	0.524	0.64
res2net50_14w_8s	res2net50_14w_8s	in1k	224	0.28	S	25.06	S	Convolution	Conventional	1200000	0.761	0.641	0.239	0.358	0.05	0.322	0.423	0.9448	0.876	0.411961	0.399461	0.213616	0.475	0.503	0.8098	0.642	0.376969	0.613907	0.420455	0.513	0.633
res2net50_26w_4s	res2net50_26w_4s	in1k	224	0.28	S	25.7	S	Convolution	Conventional	1200000	0.765	0.643	0.24	0.361	0.052	0.324	0.424	0.9444	0.891	0.414912	0.393911	0.20737	0.477	0.505	0.809	0.644	0.37126	0.594698	0.409091	0.505	0.624
res2net50_26w_6s	res2net50_26w_6s	in1k	224	0.28	S	37.05	S	Convolution	Conventional	1200000	0.775	0.658	0.255	0.375	0.067	0.339	0.437	0.9472	0.878	0.41806	0.392801	0.231106	0.48	0.507	0.812	0.641	0.37185	0.61237	0.397727	0.506	0.623
res2net50_26w_8s	res2net50_26w_8s	in1k	224	0.28	S	48.4	S	Convolution	Conventional	1200000	0.78	0.663	0.262	0.385	0.078	0.347	0.445	0.916	0.83	0.350187	0.351729	0.167395	0.425	0.464	0.7756	0.605	0.325787	0.540914	0.295455	0.442	0.57
res2net50_48w_2s	res2net50_48w_2s	in1k	224	0.28	S	25.29	S	Convolution	Conventional	1200000	0.742	0.623	0.217	0.336	0.036	0.303	0.408	0.9436	0.871	0.409994	0.38947	0.197377	0.467	0.495	0.8058	0.632	0.362008	0.593162	0.488636	0.519	0.644
res2next50	res2next50	in1k	224	0.28	S	24.67	S	Convolution	Conventional	1200000	0.768	0.647	0.246	0.366	0.056	0.329	0.428	0.9436	0.876	0.401338	0.388202	0.224859	0.473	0.501	0.8084	0.629	0.367913	0.579716	0.386364	0.491	0.607
resmlp_12_224	resmlp_12_224	in1k	224	0.28	S	15.35	S	MLP	Conventional	1200000	0.776	0.658	0.255	0.378	0.07	0.34	0.438	0.94	0.872	0.448161	0.431335	0.245472	0.499	0.531	0.774	0.6	0.357087	0.645793	0.590909	0.548	0.708
resmlp_12_distilled_224	resmlp_12_distilled_224	in1k	224	0.28	S	15.35	S	MLP	Conventional	1200000	0.782	0.666	0.265	0.387	0.083	0.35	0.448	0.945	0.88	0.457407	0.445766	0.265459	0.512	0.542	0.7916	0.619	0.362795	0.658471	0.568182	0.552	0.697
resmlp_24_224	resmlp_24_224	in1k	224	0.28	S	30.02	S	MLP	Conventional	1200000	0.797	0.684	0.288	0.407	0.125	0.376	0.472	0.9548	0.904	0.43557	0.427054	0.304809	0.518	0.543	0.8142	0.625	0.366929	0.65194	0.613636	0.564	0.693
resmlp_24_distilled_224	resmlp_24_distilled_224	in1k	224	0.28	S	30.02	S	MLP	Conventional	1200000	0.805	0.695	0.301	0.423	0.164	0.396	0.492	0.958	0.9	0.491442	0.476847	0.357277	0.556	0.58	0.8256	0.662	0.409055	0.684595	0.670455	0.607	0.735
resmlp_36_224	resmlp_36_224	in1k	224	0.28	S	44.69	S	MLP	Conventional	1200000	0.8	0.687	0.292	0.413	0.135	0.382	0.478	0.957	0.895	0.467637	0.455598	0.351031	0.542	0.566	0.811	0.622	0.400394	0.677295	0.670455	0.593	0.731
resmlp_36_distilled_224	resmlp_36_distilled_224	in1k	224	0.28	S	44.69	S	MLP	Conventional	1200000	0.807	0.696	0.304	0.426	0.169	0.399	0.494	0.9642	0.915	0.480031	0.467174	0.37664	0.56	0.581	0.8268	0.665	0.429134	0.695352	0.625	0.604	0.731
resmlp_big_24_distilled_224	resmlp_big_24_distilled_224	in1k	224	0.28	S	129.14	L	MLP	Conventional	1200000	0.832	0.728	0.353	0.478	0.341	0.475	0.571	0.237	0.181	0.012591	0.0193467	0.0787008	0.073	0.308	0.2082	0.093	0.011811	0.0361122	0.215909	0.089	0.427
resnest101e	resnest101e	in1k	256	0.32	M	48.28	S	Convolution	Conventional	1200000	0.829	0.724	0.346	0.47	0.314	0.464	0.56	0.9662	0.919	0.558725	0.530447	0.444097	0.613	0.634	0.8456	0.692	0.460433	0.725701	0.625	0.626	0.74
resnest14d	resnest14d	in1k	224	0.28	S	10.61	S	Convolution	Conventional	1200000	0.767	0.646	0.245	0.365	0.055	0.328	0.428	0.935	0.869	0.466457	0.435617	0.222986	0.499	0.534	0.7762	0.593	0.367323	0.626585	0.477273	0.516	0.665
resnest200e	resnest200e	in1k	320	0.4	M	70.2	M	Convolution	Conventional	1200000	0.844	0.742	0.387	0.518	0.441	0.522	0.618	0.9642	0.92	0.580169	0.530447	0.46471	0.624	0.647	0.853	0.714	0.480118	0.73569	0.670455	0.65	0.762
resnest269e	resnest269e	in1k	416	0.52	L	110.93	L	Convolution	Conventional	1200000	0.85	0.75	0.401	0.534	0.482	0.542	0.638	0.9558	0.886	0.594334	0.523153	0.351655	0.589	0.616	0.8296	0.68	0.486417	0.732232	0.465909	0.591	0.712
resnest26d	resnest26d	in1k	224	0.28	S	17.07	S	Convolution	Conventional	1200000	0.785	0.67	0.27	0.394	0.091	0.356	0.454	0.951	0.884	0.511706	0.477958	0.276702	0.538	0.566	0.8058	0.641	0.426378	0.685363	0.556818	0.577	0.716
resnest50d	resnest50d	in1k	224	0.28	S	27.48	S	Convolution	Conventional	1200000	0.809	0.698	0.306	0.428	0.174	0.402	0.497	0.9554	0.903	0.508164	0.486362	0.371018	0.567	0.593	0.8262	0.679	0.440354	0.692662	0.568182	0.595	0.72
resnest50d_1s4x24d	resnest50d_1s4x24d	in1k	224	0.28	S	25.68	S	Convolution	Conventional	1200000	0.809	0.698	0.306	0.429	0.177	0.403	0.498	0.9566	0.906	0.506787	0.489375	0.350406	0.563	0.589	0.8312	0.663	0.448622	0.712255	0.613636	0.609	0.733
resnest50d_4s2x40d	resnest50d_4s2x40d	in1k	224	0.28	S	30.42	S	Convolution	Conventional	1200000	0.813	0.705	0.312	0.437	0.204	0.415	0.51	0.9608	0.905	0.540035	0.513162	0.386009	0.586	0.61	0.8274	0.681	0.451378	0.720323	0.568182	0.605	0.731
resnet101	resnet101	in1k	224	0.28	S	44.55	S	Convolution	Conventional	1200000	0.812	0.704	0.31	0.434	0.193	0.41	0.505	0.9618	0.911	0.517608	0.454329	0.389132	0.568	0.591	0.8426	0.688	0.448622	0.694967	0.568182	0.6	0.712
resnet101d	resnet101d	in1k	320	0.4	M	44.57	S	Convolution	Conventional	1200000	0.826	0.718	0.337	0.461	0.29	0.452	0.547	0.961	0.915	0.54338	0.494291	0.349157	0.575	0.598	0.8448	0.677	0.474213	0.714176	0.590909	0.614	0.727
resnet10t	resnet10t	in1k	224	0.28	S	5.44	S	Convolution	Conventional	1200000	0.679	0.547	0.163	0.273	0.017	0.25	0.368	0.8972	0.808	0.344088	0.346654	0.118676	0.404	0.45	0.714	0.542	0.253937	0.532078	0.454545	0.446	0.625
resnet14t	resnet14t	in1k	224	0.28	S	10.08	S	Convolution	Conventional	1200000	0.726	0.602	0.208	0.327	0.028	0.291	0.401	0.914	0.842	0.331694	0.339042	0.163023	0.419	0.458	0.7536	0.543	0.236024	0.496735	0.397727	0.418	0.555
resnet152	resnet152	in1k	224	0.28	S	60.19	M	Convolution	Conventional	1200000	0.817	0.709	0.319	0.443	0.236	0.427	0.523	0.9648	0.917	0.510722	0.471297	0.39975	0.575	0.596	0.8516	0.687	0.470079	0.70534	0.647727	0.628	0.737
resnet152	resnet152	in1k	224	0.28	S	60.19	M	Convolution	Conventional	1200000	0.783	0.668	0.285	0.413	0.061	0.357	0.456	0.9648	0.917	0.510722	0.471297	0.39975	0.575	0.596	0.8516	0.687	0.470079	0.70534	0.647727	0.628	0.737
resnet152d	resnet152d	in1k	320	0.4	M	60.21	M	Convolution	Conventional	1200000	0.833	0.729	0.353	0.479	0.343	0.476	0.571	0.962	0.921	0.56207	0.50444	0.387883	0.594	0.617	0.8444	0.695	0.484843	0.737226	0.568182	0.621	0.735
resnet18	resnet18	in1k	224	0.28	S	11.69	S	Convolution	Conventional	1200000	0.698	0.573	0.202	0.331	0.011	0.279	0.4	0.8992	0.809	0.371434	0.363463	0.130543	0.419	0.466	0.7206	0.547	0.294685	0.603534	0.431818	0.469	0.651
resnet18	resnet18	in1k	224	0.28	S	11.69	S	Convolution	Conventional	1200000	0.629	0.495	0.14	0.251	0.012	0.225	0.358	0.8992	0.809	0.371434	0.363463	0.130543	0.419	0.466	0.7206	0.547	0.294685	0.603534	0.431818	0.469	0.651
resnet18d	resnet18d	in1k	224	0.28	S	11.71	S	Convolution	Conventional	1200000	0.723	0.591	0.202	0.32	0.026	0.285	0.394	0.9226	0.836	0.432619	0.404853	0.163023	0.459	0.498	0.753	0.581	0.348425	0.607376	0.465909	0.501	0.665
resnet200d	resnet200d	in1k	320	0.4	M	64.69	M	Convolution	Conventional	1200000	0.838	0.735	0.365	0.494	0.381	0.494	0.589	0.965	0.914	0.576825	0.516968	0.397252	0.601	0.623	0.85	0.689	0.482874	0.733769	0.659091	0.641	0.754
resnet26	resnet26	in1k	224	0.28	S	16	S	Convolution	Conventional	1200000	0.717	0.588	0.193	0.304	0.025	0.278	0.388	0.932	0.872	0.395829	0.395972	0.179888	0.461	0.495	0.7854	0.599	0.320669	0.572032	0.477273	0.492	0.626
resnet26d	resnet26d	in1k	224	0.28	S	16.01	S	Convolution	Conventional	1200000	0.751	0.629	0.225	0.348	0.04	0.311	0.414	0.9408	0.865	0.3976	0.410086	0.193004	0.466	0.495	0.7932	0.617	0.33248	0.583173	0.443182	0.494	0.623
resnet26t	resnet26t	in1k	256	0.32	M	16.01	S	Convolution	Conventional	1200000	0.771	0.652	0.25	0.369	0.061	0.333	0.432	0.9432	0.873	0.441472	0.435775	0.213616	0.491	0.521	0.7928	0.602	0.375	0.62159	0.443182	0.51	0.643
resnet32ts	resnet32ts	in1k	256	0.32	M	17.96	S	Convolution	Conventional	1200000	0.784	0.668	0.267	0.39	0.088	0.353	0.45	0.9464	0.883	0.459571	0.43308	0.218613	0.499	0.527	0.803	0.641	0.38248	0.620438	0.511364	0.539	0.671
resnet33ts	resnet33ts	in1k	256	0.32	M	19.68	S	Convolution	Conventional	1200000	0.786	0.671	0.271	0.395	0.092	0.357	0.454	0.9474	0.88	0.446193	0.429274	0.234229	0.497	0.525	0.8134	0.642	0.37815	0.611986	0.477273	0.527	0.648
resnet34	resnet34	in1k	224	0.28	S	21.8	S	Convolution	Conventional	1200000	0.733	0.609	0.235	0.361	0.019	0.306	0.417	0.9324	0.861	0.450128	0.408024	0.187383	0.477	0.512	0.7766	0.607	0.373031	0.622743	0.409091	0.503	0.648
resnet34d	resnet34d	in1k	224	0.28	S	21.82	S	Convolution	Conventional	1200000	0.772	0.654	0.253	0.371	0.064	0.336	0.435	0.9402	0.878	0.481015	0.428005	0.207995	0.499	0.531	0.8016	0.637	0.403346	0.654245	0.477273	0.543	0.677
resnet50	resnet50	in1k	224	0.28	S	25.56	S	Convolution	Conventional	1200000	0.761	0.632	0.241	0.362	0	0.309	0.406	0.9564	0.889	0.43675	0.411513	0.279825	0.504	0.527	0.8282	0.657	0.385039	0.620822	0.443182	0.527	0.636
resnet50_gn	resnet50_gn	in1k	224	0.28	S	25.56	S	Convolution	Conventional	1200000	0.799	0.687	0.292	0.413	0.135	0.382	0.478	0.9528	0.9	0.485343	0.423248	0.309806	0.53	0.556	0.8296	0.664	0.408071	0.635421	0.511364	0.555	0.669
resnet50d	resnet50d	in1k	224	0.28	S	25.58	S	Convolution	Conventional	1200000	0.795	0.681	0.286	0.405	0.117	0.372	0.468	0.9554	0.899	0.504033	0.459404	0.297314	0.54	0.565	0.83	0.652	0.425	0.660392	0.556818	0.574	0.692
resnet51q	resnet51q	in1k	288	0.36	M	35.7	S	Convolution	Conventional	1200000	0.814	0.705	0.313	0.438	0.21	0.417	0.512	0.9614	0.907	0.518395	0.472407	0.359775	0.564	0.587	0.8362	0.681	0.444094	0.671917	0.590909	0.597	0.714
resnet61q	resnet61q	in1k	288	0.36	M	36.85	S	Convolution	Conventional	1200000	0.815	0.708	0.315	0.441	0.23	0.424	0.52	0.9612	0.911	0.499705	0.44751	0.329794	0.547	0.569	0.8294	0.651	0.441732	0.661544	0.625	0.595	0.717
resnetaa50	resnetaa50	in1k	288	0.36	M	25.56	S	Convolution	Conventional	1200000	0.813	0.704	0.311	0.437	0.201	0.413	0.508	0.9594	0.907	0.477867	0.426578	0.314179	0.531	0.553	0.831	0.646	0.40315	0.641567	0.5	0.548	0.659
resnetblur50	resnetblur50	in1k	224	0.28	S	25.56	S	Convolution	Conventional	1200000	0.782	0.666	0.264	0.387	0.083	0.35	0.448	0.9492	0.893	0.479245	0.446876	0.269207	0.522	0.55	0.818	0.658	0.409843	0.6335	0.534091	0.559	0.683
resnetrs101	resnetrs101	in1k	288	0.36	M	63.62	M	Convolution	Conventional	1200000	0.814	0.705	0.312	0.437	0.209	0.416	0.511	0.9638	0.909	0.555774	0.466857	0.339788	0.568	0.589	0.8408	0.683	0.447441	0.703419	0.522727	0.589	0.701
resnetrs152	resnetrs152	in1k	320	0.4	M	86.62	M	Convolution	Conventional	1200000	0.825	0.718	0.336	0.46	0.289	0.451	0.547	0.9624	0.912	0.555184	0.475896	0.357277	0.575	0.597	0.8438	0.676	0.443701	0.703035	0.522727	0.586	0.694
resnetrs200	resnetrs200	in1k	320	0.4	M	93.21	M	Convolution	Conventional	1200000	0.844	0.741	0.385	0.516	0.437	0.52	0.616	0.9656	0.92	0.554004	0.488741	0.476577	0.61	0.632	0.8582	0.699	0.47815	0.69612	0.670455	0.636	0.741
resnetrs270	resnetrs270	in1k	352	0.44	M	129.86	L	Convolution	Conventional	1200000	0.834	0.73	0.355	0.481	0.35	0.479	0.574	0.9648	0.913	0.61145	0.513479	0.392879	0.608	0.63	0.8494	0.699	0.472244	0.735305	0.511364	0.604	0.711
resnetrs350	resnetrs350	in1k	384	0.48	M	163.96	L	Convolution	Conventional	1200000	0.84	0.737	0.37	0.498	0.399	0.501	0.596	0.9628	0.916	0.647649	0.523787	0.395378	0.621	0.645	0.8536	0.711	0.488189	0.7403	0.568182	0.627	0.735
resnetrs420	resnetrs420	in1k	416	0.52	L	191.89	L	Convolution	Conventional	1200000	0.843	0.741	0.382	0.511	0.431	0.516	0.612	0.9582	0.9	0.58194	0.503013	0.339163	0.581	0.606	0.8436	0.682	0.479528	0.730695	0.488636	0.595	0.705
resnetrs50	resnetrs50	in1k	224	0.28	S	35.69	S	Convolution	Conventional	1200000	0.789	0.674	0.275	0.397	0.101	0.362	0.459	0.957	0.895	0.467244	0.399619	0.271705	0.508	0.531	0.8248	0.668	0.382677	0.62889	0.545455	0.556	0.674
resnetv2_101	resnetv2_101	in1k	224	0.28	S	44.54	S	Convolution	Conventional	1200000	0.812	0.704	0.311	0.435	0.2	0.413	0.509	0.9466	0.881	0.434783	0.43752	0.307308	0.515	0.544	0.8044	0.634	0.398622	0.668844	0.363636	0.516	0.641
resnetv2_101x1_bitm	resnetv2_101x1_bitm	in21k	448	0.56	L	44.54	S	Convolution	Conventional	14200000	0.839	0.736	0.368	0.495	0.389	0.497	0.592	0.9532	0.889	0.519378	0.474469	0.335415	0.555	0.582	0.7736	0.606	0.337205	0.621206	0.420455	0.496	0.641
resnetv2_101x3_bitm	resnetv2_101x3_bitm	in21k	448	0.56	L	387.93	L	Convolution	Conventional	14200000	0.854	0.756	0.431	0.565	0.54	0.573	0.671	0.959	0.908	0.578792	0.527117	0.39975	0.603	0.629	0.7856	0.632	0.370276	0.650788	0.545455	0.55	0.7
resnetv2_152x2_bit_teacher	resnetv2_152x2_bit_teacher	in21k	224	0.28	S	236.34	L	Convolution	Conventional	14200000	0.831	0.726	0.349	0.475	0.331	0.47	0.566	0.9702	0.93	0.61204	0.537742	0.475328	0.639	0.659	0.8294	0.674	0.392717	0.675759	0.556818	0.575	0.693
resnetv2_152x2_bit_teacher_384	resnetv2_152x2_bit_teacher_384	in21k	384	0.48	M	236.34	L	Convolution	Conventional	14200000	0.851	0.754	0.413	0.542	0.512	0.555	0.652	0.951	0.894	0.590596	0.513796	0.404122	0.601	0.632	0.7716	0.602	0.385236	0.659239	0.545455	0.548	0.71
resnetv2_152x2_bitm	resnetv2_152x2_bitm	in21k	448	0.56	L	236.34	L	Convolution	Conventional	14200000	0.854	0.756	0.428	0.565	0.54	0.572	0.67	0.96	0.909	0.616565	0.528861	0.426608	0.62	0.646	0.7838	0.629	0.394488	0.669612	0.534091	0.557	0.711
resnetv2_152x4_bitm	resnetv2_152x4_bitm	in21k	480	0.6	L	936.53	L	Convolution	Conventional	14200000	0.861	0.765	0.478	0.63	0.608	0.62	0.72	0.9584	0.909	0.597482	0.531874	0.482199	0.63	0.657	0.7854	0.616	0.40315	0.653477	0.556818	0.557	0.709
resnetv2_50	resnetv2_50	in1k	224	0.28	S	25.55	S	Convolution	Conventional	1200000	0.792	0.676	0.28	0.401	0.11	0.367	0.463	0.9428	0.881	0.44521	0.431177	0.260462	0.504	0.535	0.8026	0.614	0.395276	0.646177	0.431818	0.522	0.65
resnetv2_50d_evos	resnetv2_50d_evos	in1k	288	0.36	M	25.59	S	Convolution	Conventional	1200000	0.82	0.71	0.326	0.451	0.245	0.433	0.528	0.9596	0.906	0.498721	0.457818	0.325422	0.547	0.57	0.8324	0.664	0.418701	0.644257	0.5	0.557	0.669
resnetv2_50d_gn	resnetv2_50d_gn	in1k	288	0.36	M	25.57	S	Convolution	Conventional	1200000	0.818	0.709	0.32	0.446	0.239	0.429	0.524	0.9586	0.902	0.49459	0.4464	0.332292	0.544	0.567	0.833	0.674	0.424409	0.650788	0.579545	0.582	0.699
resnetv2_50x1_bit_distilled	resnetv2_50x1_bit_distilled	in1k	224	0.28	S	25.55	S	Convolution	Conventional	1200000	0.821	0.711	0.328	0.453	0.251	0.436	0.531	0.971	0.921	0.521149	0.497463	0.425984	0.591	0.609	0.838	0.685	0.407087	0.688052	0.602273	0.596	0.711
resnetv2_50x1_bitm	resnetv2_50x1_bitm	in21k	448	0.56	L	25.55	S	Convolution	Conventional	14200000	0.824	0.716	0.334	0.459	0.273	0.446	0.541	0.939	0.879	0.533346	0.468284	0.272954	0.538	0.573	0.7478	0.572	0.326575	0.594698	0.363636	0.464	0.62
resnetv2_50x3_bitm	resnetv2_50x3_bitm	in21k	448	0.56	L	217.32	L	Convolution	Conventional	14200000	0.849	0.748	0.399	0.532	0.473	0.538	0.634	0.9556	0.899	0.58371	0.534412	0.393504	0.603	0.631	0.7842	0.621	0.373622	0.653861	0.431818	0.52	0.663
resnext101_32x8d	resnext101_32x8d	in1k	224	0.28	S	88.79	M	Convolution	Conventional	1200000	0.79	0.675	0.276	0.398	0.102	0.363	0.459	0.9508	0.897	0.479638	0.446242	0.259213	0.521	0.548	0.8192	0.663	0.416732	0.6869	0.534091	0.575	0.702
resnext101_64x4d	resnext101_64x4d	in1k	288	0.36	M	83.46	M	Convolution	Conventional	1200000	0.837	0.732	0.36	0.486	0.367	0.486	0.581	0.966	0.919	0.510329	0.458452	0.434104	0.58	0.6	0.8556	0.692	0.445669	0.672685	0.568182	0.595	0.695
resnext26ts	resnext26ts	in1k	256	0.32	M	10.3	S	Convolution	Conventional	1200000	0.755	0.633	0.234	0.352	0.047	0.317	0.42	0.9338	0.854	0.419634	0.411037	0.186134	0.468	0.501	0.78	0.578	0.331102	0.58471	0.511364	0.501	0.642
resnext50_32x4d	resnext50_32x4d	in1k	224	0.28	S	25.03	S	Convolution	Conventional	1200000	0.802	0.69	0.295	0.416	0.145	0.387	0.483	0.9614	0.905	0.452489	0.428164	0.341661	0.532	0.553	0.8382	0.673	0.406693	0.627737	0.545455	0.563	0.672
resnext50_32x4d	resnext50_32x4d	in1k	224	0.28	S	25.03	S	Convolution	Conventional	1200000	0.776	0.658	0.255	0.377	0.048	0.335	0.432	0.9614	0.905	0.452489	0.428164	0.341661	0.532	0.553	0.8382	0.673	0.406693	0.627737	0.545455	0.563	0.672
resnext50d_32x4d	resnext50d_32x4d	in1k	224	0.28	S	25.05	S	Convolution	Conventional	1200000	0.791	0.676	0.278	0.4	0.104	0.365	0.461	0.9542	0.895	0.448751	0.43419	0.272954	0.513	0.538	0.8312	0.654	0.381299	0.625816	0.454545	0.529	0.636
rexnet_100	rexnet_100	in1k	224	0.28	S	4.8	S	Convolution	Conventional	1200000	0.785	0.669	0.268	0.393	0.089	0.355	0.452	0.9448	0.876	0.458587	0.411989	0.256715	0.501	0.53	0.805	0.621	0.385827	0.614291	0.465909	0.522	0.648
rexnet_130	rexnet_130	in1k	224	0.28	S	7.56	S	Convolution	Conventional	1200000	0.791	0.675	0.278	0.4	0.104	0.364	0.46	0.9542	0.903	0.472949	0.44085	0.296065	0.528	0.553	0.8194	0.658	0.395472	0.627737	0.545455	0.557	0.68
rexnet_150	rexnet_150	in1k	224	0.28	S	9.73	S	Convolution	Conventional	1200000	0.803	0.69	0.296	0.416	0.147	0.387	0.482	0.9576	0.902	0.515247	0.474627	0.327295	0.555	0.58	0.8246	0.656	0.433268	0.679216	0.602273	0.593	0.719
rexnet_200	rexnet_200	in1k	224	0.28	S	16.37	S	Convolution	Conventional	1200000	0.812	0.704	0.31	0.434	0.192	0.41	0.505	0.9604	0.915	0.540822	0.488424	0.361649	0.576	0.6	0.8366	0.675	0.443307	0.688821	0.579545	0.597	0.714
sebotnet33ts_256	sebotnet33ts_256	in1k	256	0.32	M	13.7	S	ViT	Conventional	1200000	0.814	0.705	0.312	0.437	0.207	0.415	0.51	0.957	0.909	0.457801	0.399144	0.374766	0.535	0.559	0.827	0.651	0.390945	0.616596	0.590909	0.562	0.68
sehalonet33ts	sehalonet33ts	in1k	256	0.32	M	13.69	S	ViT	Conventional	1200000	0.809	0.7	0.307	0.429	0.182	0.405	0.501	0.9612	0.893	0.451112	0.410403	0.366021	0.53	0.551	0.8276	0.671	0.385039	0.606608	0.625	0.572	0.691
selecsls42b	selecsls42b	in1k	224	0.28	S	32.46	S	Convolution	Conventional	1200000	0.755	0.633	0.233	0.352	0.047	0.316	0.419	0.9456	0.871	0.41688	0.40295	0.209869	0.475	0.502	0.8094	0.635	0.359646	0.597003	0.420455	0.503	0.621
selecsls60	selecsls60	in1k	224	0.28	S	30.67	S	Convolution	Conventional	1200000	0.769	0.649	0.247	0.367	0.057	0.33	0.429	0.9462	0.889	0.441865	0.43308	0.214241	0.495	0.523	0.8136	0.638	0.385433	0.637342	0.454545	0.529	0.65
selecsls60b	selecsls60b	in1k	224	0.28	S	32.77	S	Convolution	Conventional	1200000	0.775	0.658	0.255	0.376	0.067	0.339	0.437	0.9482	0.889	0.44757	0.430384	0.232979	0.5	0.527	0.8164	0.644	0.376378	0.63811	0.522727	0.545	0.668
semnasnet_075	semnasnet_075.rmsp_in1k	in1k	224	0.28	S	2.91	S	Convolution	Conventional	1200000	0.75	0.628	0.222	0.345	0.039	0.309	0.412	0.9292	0.846	0.417077	0.393118	0.190506	0.462	0.497	0.7516	0.56	0.322244	0.595851	0.420455	0.475	0.632
semnasnet_100	semnasnet_100.rmsp_in1k	in1k	224	0.28	S	3.89	S	Convolution	Conventional	1200000	0.751	0.629	0.224	0.347	0.04	0.31	0.413	0.9322	0.842	0.417667	0.38392	0.194878	0.46	0.493	0.7814	0.582	0.324803	0.560507	0.352273	0.455	0.582
sequencer2d_l	sequencer2d_l	in1k	224	0.28	S	54.3	M	LSTM	Conventional	1200000	0.835	0.731	0.358	0.484	0.356	0.482	0.577	0.9532	0.888	0.50482	0.452426	0.315428	0.54	0.567	0.8278	0.656	0.406299	0.658471	0.590909	0.578	0.698
sequencer2d_m	sequencer2d_m	in1k	224	0.28	S	38.31	S	LSTM	Conventional	1200000	0.828	0.723	0.342	0.466	0.306	0.459	0.554	0.9362	0.872	0.463506	0.451951	0.267333	0.514	0.549	0.7888	0.619	0.378937	0.643104	0.613636	0.564	0.715
sequencer2d_s	sequencer2d_s	in1k	224	0.28	S	27.65	S	LSTM	Conventional	1200000	0.823	0.715	0.333	0.457	0.268	0.443	0.538	0.9098	0.834	0.410781	0.422455	0.211743	0.47	0.517	0.7654	0.592	0.35	0.633116	0.568182	0.536	0.7
seresnet152d	seresnet152d	in1k	320	0.4	M	66.84	M	Convolution	Conventional	1200000	0.838	0.734	0.364	0.493	0.377	0.492	0.587	0.9688	0.913	0.570529	0.52458	0.451593	0.615	0.635	0.8496	0.698	0.489764	0.742605	0.579545	0.627	0.738
seresnet33ts	seresnet33ts	in1k	256	0.32	M	19.78	S	Convolution	Conventional	1200000	0.802	0.689	0.294	0.415	0.144	0.386	0.481	0.9518	0.881	0.467637	0.442277	0.286071	0.519	0.545	0.8208	0.65	0.406496	0.632347	0.5	0.547	0.666
seresnet50	seresnet50	in1k	224	0.28	S	28.09	S	Convolution	Conventional	1200000	0.802	0.688	0.294	0.415	0.141	0.385	0.48	0.9572	0.905	0.48672	0.451633	0.322299	0.541	0.565	0.8252	0.661	0.425	0.660776	0.431818	0.545	0.66
seresnext101_32x8d	seresnext101_32x8d	in1k	288	0.36	M	93.57	M	Convolution	Conventional	1200000	0.839	0.737	0.37	0.497	0.395	0.5	0.596	0.9706	0.915	0.529608	0.47542	0.487196	0.602	0.62	0.8576	0.712	0.474803	0.715713	0.636364	0.635	0.74
seresnext101d_32x8d	seresnext101d_32x8d	in1k	288	0.36	M	93.59	M	Convolution	Conventional	1200000	0.841	0.739	0.373	0.503	0.411	0.507	0.603	0.9674	0.92	0.574267	0.487472	0.508432	0.623	0.644	0.8624	0.705	0.497441	0.721475	0.579545	0.626	0.726
seresnext26d_32x4d	seresnext26d_32x4d	in1k	224	0.28	S	16.81	S	Convolution	Conventional	1200000	0.785	0.67	0.27	0.394	0.091	0.356	0.454	0.9468	0.875	0.400944	0.401522	0.248595	0.482	0.509	0.8142	0.627	0.349213	0.590473	0.454545	0.505	0.62
seresnext26t_32x4d	seresnext26t_32x4d	in1k	224	0.28	S	16.81	S	Convolution	Conventional	1200000	0.784	0.669	0.268	0.392	0.089	0.355	0.453	0.9486	0.878	0.414519	0.400095	0.261087	0.488	0.514	0.8144	0.625	0.351969	0.578947	0.443182	0.5	0.614
seresnext26ts	seresnext26ts	in1k	256	0.32	M	10.39	S	Convolution	Conventional	1200000	0.776	0.659	0.256	0.378	0.071	0.341	0.439	0.9418	0.856	0.433209	0.411354	0.224235	0.481	0.511	0.7884	0.621	0.350197	0.59393	0.511364	0.519	0.658
seresnext50_32x4d	seresnext50_32x4d	in1k	224	0.28	S	27.56	S	Convolution	Conventional	1200000	0.81	0.7	0.308	0.431	0.184	0.406	0.501	0.9632	0.906	0.504033	0.451792	0.369144	0.558	0.579	0.8308	0.677	0.434843	0.676143	0.522727	0.578	0.696
seresnextaa101d_32x8d	seresnextaa101d_32x8d	in1k	288	0.36	M	93.59	M	Convolution	Conventional	1200000	0.844	0.741	0.385	0.517	0.439	0.521	0.617	0.9676	0.923	0.584891	0.513796	0.518426	0.635	0.656	0.8654	0.706	0.488976	0.728774	0.738636	0.666	0.77
skresnet18	skresnet18	in1k	224	0.28	S	11.96	S	Convolution	Conventional	1200000	0.731	0.608	0.213	0.331	0.03	0.296	0.405	0.9204	0.834	0.422192	0.40184	0.163023	0.455	0.494	0.7572	0.582	0.341535	0.613139	0.420455	0.489	0.646
skresnet34	skresnet34	in1k	224	0.28	S	22.28	S	Convolution	Conventional	1200000	0.773	0.655	0.253	0.371	0.065	0.336	0.435	0.9396	0.864	0.470785	0.425944	0.231106	0.498	0.53	0.7874	0.634	0.391929	0.659239	0.454545	0.535	0.679
skresnext50_32x4d	skresnext50_32x4d	in1k	224	0.28	S	27.48	S	Convolution	Conventional	1200000	0.803	0.692	0.297	0.419	0.153	0.39	0.486	0.9554	0.896	0.447374	0.431177	0.324172	0.525	0.55	0.825	0.663	0.38189	0.61967	0.568182	0.558	0.676
spnasnet_100	spnasnet_100.rmsp_in1k	in1k	224	0.28	S	4.42	S	Convolution	Conventional	1200000	0.74	0.621	0.216	0.336	0.036	0.302	0.408	0.9258	0.834	0.36927	0.376784	0.183635	0.441	0.476	0.759	0.568	0.308858	0.547061	0.443182	0.467	0.615
ssl_resnet18	ssl_resnet18	yfc-semisl	224	0.28	S	11.69	S	Convolution	Conventional	15000000	0.746	0.625	0.219	0.338	0.037	0.305	0.409	0.9276	0.851	0.423372	0.40628	0.202374	0.471	0.508	0.7464	0.57	0.300197	0.588936	0.545455	0.501	0.671
ssl_resnet50	ssl_resnet50	yfc-semisl	224	0.28	S	25.56	S	Convolution	Conventional	15000000	0.804	0.693	0.299	0.421	0.159	0.393	0.489	0.9594	0.918	0.520952	0.478592	0.3604	0.569	0.593	0.8116	0.658	0.391142	0.683058	0.568182	0.575	0.708
ssl_resnext101_32x16d	ssl_resnext101_32x16d	yfc-semisl	224	0.28	S	194.03	L	Convolution	Conventional	15000000	0.831	0.726	0.347	0.472	0.327	0.468	0.563	0.9676	0.925	0.572693	0.519347	0.467833	0.621	0.642	0.8436	0.687	0.437795	0.724164	0.704545	0.638	0.756
ssl_resnext101_32x4d	ssl_resnext101_32x4d	yfc-semisl	224	0.28	S	44.18	S	Convolution	Conventional	15000000	0.82	0.71	0.324	0.449	0.242	0.431	0.526	0.9644	0.918	0.53256	0.486045	0.399126	0.584	0.606	0.8278	0.675	0.407874	0.70534	0.590909	0.595	0.719
ssl_resnext101_32x8d	ssl_resnext101_32x8d	yfc-semisl	224	0.28	S	88.79	M	Convolution	Conventional	15000000	0.826	0.719	0.338	0.461	0.291	0.452	0.547	0.965	0.916	0.567775	0.50444	0.44847	0.609	0.631	0.84	0.689	0.43248	0.716865	0.693182	0.633	0.754
ssl_resnext50_32x4d	ssl_resnext50_32x4d	yfc-semisl	224	0.28	S	25.03	S	Convolution	Conventional	15000000	0.813	0.704	0.311	0.436	0.2	0.413	0.508	0.9626	0.92	0.528625	0.49112	0.366646	0.577	0.599	0.8236	0.677	0.404528	0.669996	0.704545	0.614	0.746
swin_base_patch4_window12_384	swin_base_patch4_window12_384	in21k	384	0.48	M	87.9	M	ViT	Conventional	14200000	0.865	0.769	0.504	0.656	0.645	0.644	0.745	0.982	0.951	0.754672	0.66635	0.797002	0.792	0.807	0.8626	0.715	0.48248	0.784864	0.886364	0.717	0.831
swin_base_patch4_window7_224	swin_base_patch4_window7_224	in21k	224	0.28	S	87.77	M	ViT	Conventional	14200000	0.852	0.755	0.414	0.544	0.514	0.557	0.654	0.9776	0.94	0.722408	0.636061	0.670206	0.742	0.759	0.8498	0.693	0.469685	0.759892	0.75	0.668	0.786
swin_large_patch4_window12_384	swin_large_patch4_window12_384	in21k	384	0.48	M	196.74	L	ViT	Conventional	14200000	0.871	0.778	0.537	0.708	0.696	0.68	0.781	0.9822	0.949	0.763722	0.687123	0.834478	0.809	0.824	0.873	0.75	0.501575	0.792547	0.840909	0.721	0.826
swin_large_patch4_window7_224	swin_large_patch4_window7_224	in21k	224	0.28	S	196.53	L	ViT	Conventional	14200000	0.861	0.766	0.478	0.632	0.609	0.621	0.721	0.981	0.95	0.750541	0.679829	0.742661	0.781	0.796	0.8568	0.711	0.490354	0.782943	0.761364	0.686	0.801
swin_s3_base_224	swin_s3_base_224	in1k	224	0.28	S	71.13	M	ViT	Conventional	1200000	0.84	0.737	0.37	0.498	0.398	0.501	0.596	0.9688	0.913	0.560299	0.493498	0.547158	0.628	0.648	0.8712	0.692	0.475	0.709182	0.693182	0.642	0.737
swin_s3_small_224	swin_s3_small_224	in1k	224	0.28	S	49.74	S	ViT	Conventional	1200000	0.837	0.733	0.362	0.489	0.369	0.488	0.583	0.9694	0.923	0.520165	0.482398	0.534666	0.615	0.634	0.8636	0.69	0.468701	0.693815	0.704545	0.639	0.74
swin_s3_tiny_224	swin_s3_tiny_224	in1k	224	0.28	S	28.33	S	ViT	Conventional	1200000	0.823	0.715	0.331	0.457	0.265	0.442	0.537	0.9648	0.914	0.498721	0.463527	0.452842	0.582	0.603	0.8456	0.668	0.420472	0.664618	0.613636	0.592	0.7
swin_small_patch4_window7_224	swin_small_patch4_window7_224	in1k	224	0.28	S	49.61	S	ViT	Conventional	1200000	0.831	0.726	0.347	0.472	0.326	0.468	0.563	0.9662	0.916	0.51446	0.480336	0.51218	0.606	0.627	0.854	0.697	0.45	0.686131	0.715909	0.637	0.746
swin_tiny_patch4_window7_224	swin_tiny_patch4_window7_224	in1k	224	0.28	S	28.29	S	ViT	Conventional	1200000	0.814	0.706	0.313	0.438	0.211	0.417	0.512	0.9618	0.908	0.481605	0.449255	0.42411	0.566	0.588	0.8324	0.659	0.38937	0.640031	0.579545	0.567	0.681
swinv2_base_window12to16_192to256_22kft1k	swinv2_base_window12to16_192to256_22kft1k	in21k	256	0.32	M	87.92	M	ViT	Conventional	14200000	0.864	0.769	0.495	0.644	0.632	0.635	0.735	0.9798	0.943	0.748967	0.662226	0.771393	0.781	0.797	0.8604	0.713	0.496654	0.7937	0.840909	0.711	0.826
swinv2_base_window12to24_192to384_22kft1k	swinv2_base_window12to24_192to384_22kft1k	in21k	384	0.48	M	87.92	M	ViT	Conventional	14200000	0.875	0.786	0.558	0.747	0.713	0.701	0.801	0.9822	0.953	0.754476	0.67967	0.852592	0.81	0.825	0.8738	0.737	0.5	0.79831	0.840909	0.719	0.823
swinv2_base_window16_256	swinv2_base_window16_256	in1k	256	0.32	M	87.92	M	ViT	Conventional	1200000	0.848	0.746	0.397	0.527	0.463	0.533	0.629	0.9696	0.922	0.561676	0.503806	0.615865	0.651	0.671	0.8752	0.711	0.487402	0.736074	0.738636	0.668	0.763
swinv2_base_window8_256	swinv2_base_window8_256	in1k	256	0.32	M	87.92	M	ViT	Conventional	1200000	0.842	0.739	0.376	0.504	0.415	0.509	0.605	0.9714	0.933	0.548298	0.505392	0.569019	0.639	0.658	0.8642	0.709	0.464173	0.724549	0.715909	0.653	0.756
swinv2_cr_small_224	swinv2_cr_small_224	in1k	224	0.28	S	49.7	S	ViT	Conventional	1200000	0.83	0.724	0.346	0.471	0.317	0.465	0.56	0.9658	0.917	0.493016	0.451316	0.482199	0.586	0.607	0.8558	0.682	0.43189	0.648483	0.727273	0.622	0.727
swinv2_cr_small_ns_224	swinv2_cr_small_ns_224	in1k	224	0.28	S	49.7	S	ViT	Conventional	1200000	0.831	0.726	0.348	0.474	0.329	0.469	0.564	0.967	0.917	0.538462	0.476689	0.503435	0.609	0.63	0.8612	0.691	0.447047	0.679985	0.693182	0.628	0.729
swinv2_cr_tiny_ns_224	swinv2_cr_tiny_ns_224	in1k	224	0.28	S	28.33	S	ViT	Conventional	1200000	0.819	0.71	0.324	0.448	0.241	0.431	0.526	0.9648	0.908	0.462719	0.442912	0.467208	0.57	0.591	0.835	0.67	0.395669	0.638878	0.636364	0.585	0.701
swinv2_large_window12to16_192to256_22kft1k	swinv2_large_window12to16_192to256_22kft1k	in21k	256	0.32	M	196.74	L	ViT	Conventional	14200000	0.869	0.773	0.52	0.677	0.673	0.661	0.761	0.9816	0.941	0.764706	0.681097	0.788257	0.794	0.809	0.8742	0.737	0.513386	0.802536	0.795455	0.712	0.814
swinv2_large_window12to24_192to384_22kft1k	swinv2_large_window12to24_192to384_22kft1k	in21k	384	0.48	M	196.74	L	ViT	Conventional	14200000	0.875	0.791	0.568	0.758	0.739	0.714	0.816	0.982	0.948	0.776707	0.694418	0.851343	0.818	0.833	0.8806	0.745	0.521063	0.804456	0.863636	0.734	0.834
swinv2_small_window16_256	swinv2_small_window16_256	in1k	256	0.32	M	49.73	S	ViT	Conventional	1200000	0.843	0.74	0.379	0.509	0.423	0.513	0.609	0.971	0.928	0.554397	0.510466	0.574016	0.642	0.661	0.8732	0.715	0.475591	0.711871	0.738636	0.66	0.756
swinv2_small_window8_256	swinv2_small_window8_256	in1k	256	0.32	M	49.73	S	ViT	Conventional	1200000	0.838	0.735	0.364	0.493	0.378	0.493	0.588	0.9684	0.928	0.528231	0.485728	0.540287	0.621	0.641	0.8582	0.703	0.44311	0.696504	0.693182	0.634	0.739
swinv2_tiny_window16_256	swinv2_tiny_window16_256	in1k	256	0.32	M	28.35	S	ViT	Conventional	1200000	0.83	0.725	0.347	0.471	0.317	0.465	0.56	0.9656	0.919	0.513673	0.463368	0.493442	0.597	0.618	0.8556	0.694	0.419488	0.659624	0.659091	0.608	0.711
swinv2_tiny_window8_256	swinv2_tiny_window8_256	in1k	256	0.32	M	28.35	S	ViT	Conventional	1200000	0.823	0.715	0.331	0.457	0.264	0.442	0.537	0.9646	0.907	0.462719	0.446559	0.460962	0.569	0.59	0.8358	0.673	0.393701	0.628506	0.693182	0.597	0.714
swsl_resnet18	swsl_resnet18	ig1b	224	0.28	S	11.69	S	Convolution	Conventional	1000000000	0.771	0.653	0.252	0.37	0.063	0.335	0.435	0.933	0.868	0.638599	0.598953	0.242973	0.587	0.629	0.7686	0.606	0.428346	0.716481	0.613636	0.591	0.769
swsl_resnet50	swsl_resnet50	ig1b	224	0.28	S	25.56	S	Convolution	Conventional	1000000000	0.827	0.721	0.34	0.463	0.298	0.456	0.551	0.9648	0.923	0.801692	0.752299	0.489069	0.742	0.769	0.8362	0.708	0.536614	0.812908	0.693182	0.688	0.823
swsl_resnext101_32x16d	swsl_resnext101_32x16d	ig1b	224	0.28	S	194.03	L	Convolution	Conventional	1000000000	0.847	0.746	0.396	0.527	0.461	0.533	0.629	0.9732	0.939	0.869959	0.807485	0.550281	0.792	0.814	0.8522	0.735	0.588976	0.846715	0.727273	0.724	0.85
swsl_resnext101_32x4d	swsl_resnext101_32x4d	ig1b	224	0.28	S	44.18	S	Convolution	Conventional	1000000000	0.842	0.74	0.377	0.505	0.416	0.51	0.606	0.9756	0.938	0.821562	0.761338	0.560899	0.77	0.789	0.8582	0.729	0.573031	0.847868	0.75	0.725	0.845
swsl_resnext101_32x8d	swsl_resnext101_32x8d	ig1b	224	0.28	S	88.79	M	Convolution	Conventional	1000000000	0.851	0.754	0.414	0.543	0.512	0.556	0.653	0.9762	0.943	0.85363	0.781319	0.636477	0.804	0.824	0.8702	0.741	0.583071	0.850557	0.795455	0.743	0.854
swsl_resnext50_32x4d	swsl_resnext50_32x4d	ig1b	224	0.28	S	25.03	S	Convolution	Conventional	1000000000	0.831	0.726	0.349	0.475	0.33	0.47	0.566	0.9684	0.926	0.792249	0.739613	0.507183	0.741	0.765	0.8446	0.708	0.543504	0.828275	0.681818	0.69	0.817
tf_efficientnet_b0	tf_efficientnet_b0.aa_in1k	in1k	224	0.28	S	5.29	S	Convolution	Conventional	1200000	0.763	0.641	0.239	0.359	0.051	0.323	0.423	0.9404	0.86	0.446783	0.422931	0.211118	0.485	0.516	0.7894	0.612	0.376378	0.641567	0.465909	0.524	0.664
tf_efficientnet_b0_ap	tf_efficientnet_b0_ap	in1k	224	0.28	S	5.29	S	Convolution	Conventional	1200000	0.766	0.644	0.244	0.363	0.053	0.326	0.426	0.5032	0.415	0.0200669	0.166825	0.105559	0.177	0.352	0.3696	0.254	0.0338583	0.228967	0.284091	0.2	0.541
tf_efficientnet_b0_ns	tf_efficientnet_b0_ns	jft300m	224	0.28	S	5.29	S	Convolution	Conventional	300000000	0.792	0.677	0.281	0.401	0.11	0.367	0.463	0.9492	0.893	0.505213	0.495243	0.299813	0.548	0.577	0.812	0.638	0.44252	0.701882	0.522727	0.576	0.709
tf_efficientnet_b1	tf_efficientnet_b1.aa_in1k	in1k	240	0.3	M	7.79	S	Convolution	Conventional	1200000	0.776	0.66	0.257	0.379	0.071	0.342	0.441	0.942	0.875	0.471572	0.435775	0.224859	0.502	0.533	0.8122	0.625	0.396063	0.653477	0.443182	0.529	0.651
tf_efficientnet_b1_ap	tf_efficientnet_b1_ap	in1k	240	0.3	M	7.79	S	Convolution	Conventional	1200000	0.782	0.667	0.265	0.388	0.085	0.351	0.449	0.6336	0.534	0.0450521	0.19981	0.121799	0.225	0.355	0.3824	0.228	0.055315	0.27161	0.25	0.201	0.526
tf_efficientnet_b1_ns	tf_efficientnet_b1_ns	jft300m	240	0.3	M	7.79	S	Convolution	Conventional	300000000	0.81	0.701	0.309	0.431	0.187	0.407	0.502	0.9554	0.912	0.575841	0.540755	0.365397	0.598	0.626	0.8282	0.674	0.481102	0.745294	0.579545	0.62	0.749
tf_efficientnet_b2	tf_efficientnet_b2.aa_in1k	in1k	260	0.325	M	9.11	S	Convolution	Conventional	1200000	0.788	0.672	0.273	0.396	0.097	0.36	0.457	0.944	0.878	0.475113	0.440374	0.237976	0.508	0.538	0.8016	0.623	0.411024	0.669228	0.443182	0.537	0.67
tf_efficientnet_b2_ap	tf_efficientnet_b2_ap	in1k	260	0.325	M	9.11	S	Convolution	Conventional	1200000	0.791	0.676	0.278	0.4	0.105	0.365	0.461	0.3372	0.28	0.0216408	0.136695	0.0849469	0.131	0.388	0.153	0.107	0.0287402	0.165578	0.25	0.138	0.902
tf_efficientnet_b2_ns	tf_efficientnet_b2_ns	jft300m	260	0.325	M	9.11	S	Convolution	Conventional	300000000	0.818	0.709	0.321	0.447	0.24	0.429	0.524	0.9566	0.91	0.595514	0.561687	0.354778	0.605	0.632	0.8266	0.677	0.483465	0.738379	0.534091	0.608	0.736
tf_efficientnet_b3	tf_efficientnet_b3.aa_in1k	in1k	300	0.375	M	12.23	S	Convolution	Conventional	1200000	0.807	0.697	0.304	0.427	0.17	0.4	0.496	0.944	0.885	0.505017	0.460038	0.258588	0.527	0.558	0.8108	0.626	0.425591	0.690357	0.454545	0.549	0.677
tf_efficientnet_b3_ap	tf_efficientnet_b3_ap	in1k	300	0.375	M	12.23	S	Convolution	Conventional	1200000	0.808	0.697	0.305	0.428	0.172	0.401	0.496	0.6206	0.524	0.0255754	0.205201	0.146783	0.225	0.363	0.3536	0.237	0.032874	0.249328	0.261364	0.195	0.551
tf_efficientnet_b3_ns	tf_efficientnet_b3_ns	jft300m	300	0.375	M	12.23	S	Convolution	Conventional	300000000	0.834	0.731	0.356	0.483	0.355	0.481	0.577	0.958	0.917	0.616958	0.586108	0.394129	0.629	0.657	0.8292	0.693	0.517913	0.769881	0.625	0.651	0.785
tf_efficientnet_b4	tf_efficientnet_b4.aa_in1k	in1k	380	0.475	M	19.34	S	Convolution	Conventional	1200000	0.823	0.715	0.331	0.457	0.263	0.442	0.537	0.9456	0.877	0.540626	0.490802	0.262961	0.543	0.574	0.803	0.625	0.443504	0.69612	0.443182	0.552	0.687
tf_efficientnet_b4_ap	tf_efficientnet_b4_ap	in1k	380	0.475	M	19.34	S	Convolution	Conventional	1200000	0.823	0.714	0.33	0.456	0.262	0.441	0.536	0.7716	0.665	0.229392	0.34269	0.209244	0.362	0.469	0.388	0.287	0.198425	0.416827	0.227273	0.282	0.727
tf_efficientnet_b4_ns	tf_efficientnet_b4_ns	jft300m	380	0.475	M	19.34	S	Convolution	Conventional	300000000	0.852	0.755	0.414	0.543	0.513	0.556	0.653	0.956	0.914	0.667913	0.61164	0.403498	0.649	0.679	0.823	0.689	0.542717	0.782943	0.602273	0.654	0.795
tf_efficientnet_b5	tf_efficientnet_b5.ra_in1k	in1k	456	0.57	L	30.39	S	Convolution	Conventional	1200000	0.83	0.725	0.347	0.471	0.319	0.466	0.561	0.9158	0.812	0.527838	0.473834	0.211118	0.506	0.553	0.7476	0.537	0.405709	0.676911	0.352273	0.493	0.659
tf_efficientnet_b5_ap	tf_efficientnet_b5_ap	in1k	456	0.57	L	30.39	S	Convolution	Conventional	1200000	0.834	0.729	0.355	0.481	0.348	0.478	0.573	0.7828	0.657	0.0578399	0.330003	0.152405	0.299	0.382	0.6072	0.43	0.0860236	0.444871	0.329545	0.323	0.532
tf_efficientnet_b5_ns	tf_efficientnet_b5_ns	jft300m	456	0.57	L	30.39	S	Convolution	Conventional	300000000	0.86	0.764	0.477	0.622	0.603	0.617	0.717	0.944	0.891	0.646665	0.604504	0.369769	0.628	0.665	0.8014	0.651	0.519094	0.776028	0.568182	0.629	0.785
tf_efficientnet_b6	tf_efficientnet_b6.aa_in1k	in1k	528	0.66	L	43.04	S	Convolution	Conventional	1200000	0.834	0.731	0.355	0.482	0.352	0.48	0.576	0.9356	0.866	0.554004	0.505392	0.259213	0.546	0.584	0.7888	0.617	0.444685	0.706108	0.465909	0.558	0.707
tf_efficientnet_b6_ap	tf_efficientnet_b6_ap	in1k	528	0.66	L	43.04	S	Convolution	Conventional	1200000	0.841	0.739	0.373	0.502	0.408	0.506	0.602	0.9162	0.838	0.584301	0.545512	0.251718	0.555	0.606	0.7436	0.564	0.434449	0.729927	0.375	0.526	0.707
tf_efficientnet_b6_ns	tf_efficientnet_b6_ns	jft300m	528	0.66	L	43.04	S	Convolution	Conventional	300000000	0.863	0.768	0.488	0.641	0.623	0.63	0.73	0.9176	0.85	0.645288	0.597526	0.297939	0.598	0.652	0.7586	0.624	0.51378	0.733385	0.465909	0.584	0.77
tf_efficientnet_b7	tf_efficientnet_b7.ra_in1k	in1k	600	0.75	L	66.35	M	Convolution	Conventional	1200000	0.843	0.74	0.381	0.509	0.43	0.515	0.611	0.852	0.734	0.509935	0.447669	0.171143	0.466	0.547	0.6282	0.484	0.361417	0.640031	0.318182	0.451	0.718
tf_efficientnet_b7_ap	tf_efficientnet_b7_ap	in1k	600	0.75	L	66.35	M	Convolution	Conventional	1200000	0.846	0.745	0.394	0.523	0.454	0.529	0.625	0.9056	0.825	0.434192	0.520932	0.226733	0.502	0.554	0.7164	0.554	0.268701	0.665002	0.352273	0.46	0.642
tf_efficientnet_b7_ns	tf_efficientnet_b7_ns	jft300m	600	0.75	L	66.35	M	Convolution	Conventional	300000000	0.868	0.772	0.518	0.675	0.671	0.659	0.759	0.9144	0.843	0.673224	0.600856	0.312929	0.608	0.665	0.7484	0.598	0.519488	0.756819	0.477273	0.588	0.786
tf_efficientnet_b8	tf_efficientnet_b8.ap_in1k	in1k	672	0.84	L	87.41	M	Convolution	Conventional	1200000	0.85	0.751	0.405	0.535	0.49	0.545	0.641	0.8446	0.725	0.53374	0.457342	0.169269	0.471	0.558	0.6198	0.498	0.373031	0.659624	0.340909	0.468	0.755
tf_efficientnet_b8_ap	tf_efficientnet_b8_ap	in1k	672	0.84	L	87.41	M	Convolution	Conventional	1200000	0.848	0.747	0.398	0.53	0.469	0.536	0.632	0.908	0.853	0.435176	0.519188	0.392255	0.55	0.606	0.402	0.288	0.170079	0.44295	0.227273	0.282	0.701
tf_efficientnet_cc_b0_4e	tf_efficientnet_cc_b0_4e.in1k	in1k	224	0.28	S	13.31	S	Convolution	Conventional	1200000	0.77	0.651	0.249	0.368	0.06	0.332	0.431	0.7276	0.602	0.286642	0.29686	0.107433	0.323	0.444	0.5082	0.35	0.250197	0.455628	0.295455	0.338	0.665
tf_efficientnet_cc_b0_8e	tf_efficientnet_cc_b0_8e.in1k	in1k	224	0.28	S	24.01	S	Convolution	Conventional	1200000	0.776	0.66	0.257	0.379	0.071	0.342	0.441	0.831	0.721	0.0409207	0.262766	0.169894	0.299	0.36	0.6696	0.475	0.0669291	0.379178	0.386364	0.327	0.488
tf_efficientnet_cc_b1_8e	tf_efficientnet_cc_b1_8e.in1k	in1k	240	0.3	M	39.72	S	Convolution	Conventional	1200000	0.787	0.671	0.272	0.396	0.096	0.359	0.456	0.9152	0.832	0.419241	0.429274	0.199875	0.47	0.514	0.7458	0.553	0.379134	0.655398	0.409091	0.499	0.669
tf_efficientnet_el	tf_efficientnet_el.in1k	in1k	300	0.375	M	10.59	S	Convolution	Conventional	1200000	0.794	0.679	0.284	0.404	0.114	0.37	0.466	0.7304	0.619	0.0877435	0.27339	0.141162	0.28	0.383	0.4886	0.332	0.12185	0.432194	0.318182	0.301	0.616
tf_efficientnet_em	tf_efficientnet_em.in1k	in1k	240	0.3	M	6.9	S	Convolution	Conventional	1200000	0.766	0.644	0.244	0.364	0.053	0.326	0.426	0.7356	0.607	0.137911	0.285918	0.117427	0.287	0.39	0.5272	0.362	0.158465	0.394929	0.329545	0.311	0.59
tf_efficientnet_es	tf_efficientnet_es.in1k	in1k	224	0.28	S	5.44	S	Convolution	Conventional	1200000	0.747	0.626	0.22	0.343	0.038	0.307	0.411	0.655	0.539	0.0633484	0.231208	0.0993129	0.233	0.356	0.4412	0.29	0.102362	0.344987	0.306818	0.261	0.592
tf_efficientnet_l2_ns	tf_efficientnet_l2_ns	jft300m	800	1	L	0	L	Convolution	Conventional	300000000	0.886	0.805	0.588	0.797	0.848	0.76	0.858	0.986	0.961	0.722408	0.779575	0.909432	0.843	0.855	0.9048	0.823	0.587795	0.867845	0.965909	0.811	0.896
tf_efficientnet_lite0	tf_efficientnet_lite0.in1k	in1k	224	0.28	S	4.65	S	Convolution	Conventional	1200000	0.733	0.609	0.213	0.331	0.031	0.296	0.404	0.9064	0.805	0.363565	0.387567	0.134291	0.423	0.467	0.7164	0.534	0.290354	0.572801	0.352273	0.437	0.61
tf_efficientnet_lite1	tf_efficientnet_lite1.in1k	in1k	240	0.3	M	5.42	S	Convolution	Conventional	1200000	0.755	0.633	0.233	0.351	0.046	0.316	0.419	0.9136	0.835	0.433996	0.403584	0.161149	0.458	0.501	0.7364	0.564	0.327165	0.593162	0.284091	0.442	0.6
tf_efficientnet_lite2	tf_efficientnet_lite2.in1k	in1k	260	0.325	M	6.09	S	Convolution	Conventional	1200000	0.767	0.646	0.245	0.364	0.054	0.327	0.426	0.9144	0.816	0.40665	0.401681	0.177389	0.45	0.492	0.7342	0.566	0.332283	0.600845	0.261364	0.44	0.599
tf_efficientnet_lite3	tf_efficientnet_lite3.in1k	in1k	300	0.375	M	8.2	S	Convolution	Conventional	1200000	0.788	0.672	0.273	0.396	0.097	0.36	0.457	0.9168	0.833	0.427307	0.428164	0.19238	0.47	0.513	0.747	0.554	0.342913	0.611218	0.318182	0.457	0.612
tf_efficientnet_lite4	tf_efficientnet_lite4.in1k	in1k	380	0.475	M	13.01	S	Convolution	Conventional	1200000	0.809	0.7	0.307	0.429	0.181	0.404	0.499	0.9222	0.828	0.459374	0.437044	0.191131	0.479	0.519	0.743	0.558	0.374803	0.640415	0.363636	0.484	0.651
tf_efficientnetv2_b0	tf_efficientnetv2_b0.in1k	in1k	224	0.28	S	7.14	S	Convolution	Conventional	1200000	0.769	0.651	0.249	0.367	0.059	0.332	0.432	0.944	0.88	0.449931	0.417856	0.227358	0.494	0.523	0.806	0.621	0.385827	0.647714	0.443182	0.524	0.65
tf_efficientnetv2_b1	tf_efficientnetv2_b1.in1k	in1k	240	0.3	M	8.14	S	Convolution	Conventional	1200000	0.779	0.662	0.26	0.384	0.077	0.346	0.444	0.9478	0.888	0.45544	0.421186	0.252342	0.504	0.532	0.8224	0.65	0.393701	0.648098	0.454545	0.537	0.653
tf_efficientnetv2_b2	tf_efficientnetv2_b2.in1k	in1k	260	0.325	M	10.1	S	Convolution	Conventional	1200000	0.793	0.677	0.281	0.402	0.11	0.368	0.464	0.9496	0.887	0.479835	0.44085	0.252967	0.515	0.542	0.8196	0.642	0.411024	0.657703	0.465909	0.544	0.664
tf_efficientnetv2_b3	tf_efficientnetv2_b3.in1k	in1k	300	0.375	M	14.36	S	Convolution	Conventional	1200000	0.806	0.695	0.303	0.426	0.167	0.398	0.494	0.9502	0.89	0.50541	0.448462	0.266084	0.527	0.555	0.8174	0.645	0.420276	0.650019	0.477273	0.548	0.67
tf_efficientnetv2_l	tf_efficientnetv2_l.in1k	in1k	480	0.6	L	118.52	L	Convolution	Conventional	1200000	0.853	0.756	0.425	0.56	0.532	0.568	0.666	0.9438	0.876	0.581743	0.528386	0.337914	0.581	0.616	0.778	0.61	0.48622	0.733	0.477273	0.577	0.742
tf_efficientnetv2_l_in21ft1k	tf_efficientnetv2_l.in21k_ft_in1k	in21k	480	0.6	L	118.52	L	Convolution	Conventional	14200000	0.867	0.77	0.51	0.663	0.663	0.652	0.752	0.979	0.937	0.753	0.658	0.733	0.77	0.787	0.864	0.719	0.503	0.78	0.739	0.685	0.793
tf_efficientnetv2_m	tf_efficientnetv2_m.in1k	in1k	480	0.6	L	54.14	M	Convolution	Conventional	1200000	0.846	0.745	0.395	0.523	0.455	0.53	0.626	0.9348	0.863	0.545151	0.496987	0.29669	0.55	0.588	0.7708	0.568	0.439567	0.706493	0.375	0.522	0.677
tf_efficientnetv2_m_in21ft1k	tf_efficientnetv2_m.in21k_ft_in1k	in21k	480	0.6	L	54.14	M	Convolution	Conventional	14200000	0.862	0.766	0.485	0.636	0.614	0.625	0.725	0.978	0.935	0.74	0.642	0.667	0.746	0.763	0.852	0.729	0.48	0.764	0.784	0.689	0.809
tf_efficientnetv2_s	tf_efficientnetv2_s.in1k	in1k	384	0.48	M	21.46	S	Convolution	Conventional	1200000	0.826	0.718	0.338	0.461	0.291	0.452	0.547	0.7304	0.607	0.410388	0.354742	0.217989	0.398	0.545	0.2658	0.175	0.274409	0.469458	0.238636	0.289	1.087
tf_efficientnetv2_s_in21ft1k	tf_efficientnetv2_s.in21k_ft_in1k	in21k	384	0.48	M	21.46	S	Convolution	Conventional	14200000	0.85	0.75	0.402	0.534	0.485	0.543	0.639	0.973	0.918	0.658	0.57	0.587	0.683	0.702	0.848	0.692	0.445	0.716	0.659	0.628	0.741
tf_efficientnetv2_xl_in21ft1k	tf_efficientnetv2_xl.in21k_ft_in1k	in21k	480	0.6	L	208.12	L	Convolution	Conventional	14200000	0.868	0.771	0.517	0.671	0.67	0.657	0.757	0.979	0.929	0.751	0.651	0.709	0.76	0.776	0.867	0.733	0.539	0.788	0.807	0.717	0.827
tf_inception_v3	tf_inception_v3	in1k	299	0.37375	M	23.83	S	Convolution	Conventional	1200000	0.792	0.676	0.28	0.401	0.108	0.366	0.462	0.8314	0.732	0.257919	0.346495	0.138039	0.369	0.444	0.6048	0.436	0.282087	0.546677	0.272727	0.384	0.635
tf_mixnet_l	tf_mixnet_l.in1k	in1k	224	0.28	S	7.33	S	Convolution	Conventional	1200000	0.776	0.66	0.257	0.379	0.071	0.342	0.441	0.9454	0.876	0.423765	0.390898	0.22361	0.479	0.507	0.809	0.61	0.366535	0.613907	0.511364	0.525	0.649
tf_mixnet_m	tf_mixnet_m.in1k	in1k	224	0.28	S	5.01	S	Convolution	Conventional	1200000	0.763	0.642	0.239	0.36	0.051	0.323	0.423	0.9406	0.859	0.393468	0.380907	0.198626	0.458	0.487	0.8008	0.615	0.330118	0.599308	0.363636	0.477	0.596
tf_mixnet_s	tf_mixnet_s.in1k	in1k	224	0.28	S	4.13	S	Convolution	Conventional	1200000	0.75	0.628	0.223	0.345	0.039	0.309	0.412	0.9308	0.846	0.370451	0.356644	0.201749	0.444	0.477	0.7824	0.584	0.323425	0.545909	0.465909	0.48	0.613
tf_mobilenetv3_large_075	tf_mobilenetv3_large_075.in1k	in1k	224	0.28	S	3.99	S	Convolution	Conventional	1200000	0.73	0.604	0.209	0.327	0.029	0.292	0.4	0.673	0.553	0.122762	0.247383	0.118051	0.26	0.386	0.4706	0.311	0.11063	0.324625	0.295455	0.26	0.552
tf_mobilenetv3_large_100	tf_mobilenetv3_large_100.in1k	in1k	224	0.28	S	5.48	S	Convolution	Conventional	1200000	0.741	0.622	0.216	0.336	0.036	0.303	0.409	0.8376	0.727	0.165847	0.289883	0.13554	0.33	0.394	0.5996	0.421	0.132677	0.379562	0.386364	0.33	0.55
tf_mobilenetv3_large_minimal_100	tf_mobilenetv3_large_minimal_100.in1k	in1k	224	0.28	S	3.92	S	Convolution	Conventional	1200000	0.662	0.533	0.157	0.265	0.016	0.243	0.367	0.8492	0.723	0.20362	0.302728	0.109307	0.335	0.394	0.6338	0.442	0.190945	0.442566	0.284091	0.34	0.536
tf_mobilenetv3_small_075	tf_mobilenetv3_small_075.in1k	in1k	224	0.28	S	2.04	S	Convolution	Conventional	1200000	0.7	0.572	0.174	0.288	0.02	0.264	0.377	0.7478	0.618	0.0997442	0.224389	0.0949407	0.259	0.346	0.5592	0.368	0.0938976	0.348828	0.272727	0.271	0.485
tf_mobilenetv3_small_100	tf_mobilenetv3_small_100.in1k	in1k	224	0.28	S	2.54	S	Convolution	Conventional	1200000	0.703	0.574	0.175	0.29	0.02	0.265	0.377	0.7708	0.641	0.102302	0.222328	0.0874453	0.263	0.341	0.5694	0.39	0.0911417	0.336919	0.295455	0.278	0.488
tf_mobilenetv3_small_minimal_100	tf_mobilenetv3_small_minimal_100.in1k	in1k	224	0.28	S	2.04	S	Convolution	Conventional	1200000	0.599	0.467	0.127	0.234	0.01	0.21	0.351	0.7426	0.594	0.147944	0.258801	0.0743285	0.269	0.362	0.512	0.346	0.139567	0.390319	0.284091	0.29	0.566
tinynet_a	tinynet_a.in1k	in1k	192	0.24	S	6.19	S	Convolution	Conventional	1200000	0.774	0.657	0.255	0.373	0.066	0.338	0.437	0.9474	0.889	0.452685	0.411671	0.246096	0.5	0.528	0.8142	0.645	0.375	0.625048	0.454545	0.525	0.645
tinynet_b	tinynet_b.in1k	in1k	188	0.235	S	3.73	S	Convolution	Conventional	1200000	0.755	0.632	0.23	0.35	0.042	0.314	0.416	0.9386	0.866	0.423175	0.397399	0.216115	0.476	0.507	0.7948	0.61	0.348031	0.59854	0.363636	0.48	0.604
tinynet_c	tinynet_c.in1k	in1k	184	0.23	S	2.46	S	Convolution	Conventional	1200000	0.733	0.61	0.213	0.332	0.031	0.297	0.405	0.9216	0.821	0.380287	0.37282	0.177389	0.438	0.475	0.7576	0.561	0.299213	0.542451	0.443182	0.461	0.609
tinynet_d	tinynet_d.in1k	in1k	152	0.19	S	2.34	S	Convolution	Conventional	1200000	0.729	0.603	0.209	0.327	0.029	0.292	0.401	0.9054	0.807	0.329333	0.338091	0.157402	0.408	0.451	0.7296	0.518	0.250787	0.489051	0.443182	0.425	0.583
tinynet_e	tinynet_e.in1k	in1k	106	0.1325	S	2.04	S	Convolution	Conventional	1200000	0.689	0.561	0.168	0.284	0.019	0.258	0.374	0.8422	0.721	0.168601	0.244053	0.126171	0.315	0.374	0.6524	0.425	0.13878	0.340376	0.431818	0.334	0.512
tnt_s_patch16_224	tnt_s_patch16_224	in1k	224	0.28	S	23.76	S	ViT	Conventional	1200000	0.82	0.71	0.326	0.451	0.247	0.434	0.529	0.9582	0.898	0.470588	0.440533	0.400999	0.553	0.577	0.8024	0.633	0.335827	0.643872	0.625	0.559	0.697
tv_densenet121	tv_densenet121	in1k	224	0.28	S	7.98	S	Convolution	Conventional	1200000	0.722	0.591	0.202	0.319	0.026	0.285	0.395	0.931	0.862	0.441865	0.40628	0.161149	0.468	0.503	0.7834	0.624	0.360433	0.637726	0.534091	0.539	0.688
tv_resnet101	tv_resnet101	in1k	224	0.28	S	44.55	S	Convolution	Conventional	1200000	0.756	0.633	0.234	0.353	0.047	0.317	0.419	0.939	0.878	0.457407	0.421186	0.214866	0.493	0.525	0.8018	0.645	0.369882	0.630811	0.488636	0.534	0.666
tv_resnet152	tv_resnet152	in1k	224	0.28	S	60.19	M	Convolution	Conventional	1200000	0.77	0.652	0.249	0.368	0.06	0.332	0.431	0.947	0.884	0.447177	0.426102	0.21549	0.493	0.521	0.806	0.655	0.402165	0.655013	0.5	0.553	0.686
tv_resnet34	tv_resnet34	in1k	224	0.28	S	21.8	S	Convolution	Conventional	1200000	0.697	0.57	0.173	0.286	0.019	0.262	0.376	0.9148	0.84	0.420224	0.38947	0.156777	0.452	0.494	0.7666	0.584	0.322638	0.603534	0.477273	0.497	0.648
tv_resnet50	tv_resnet50	in1k	224	0.28	S	25.56	S	Convolution	Conventional	1200000	0.579	0.449	0.11	0.217	0	0.194	0.335	0.9352	0.874	0.389337	0.384872	0.132417	0.445	0.476	0.7806	0.604	0.37126	0.626969	0.340909	0.486	0.623
tv_resnext50_32x4d	tv_resnext50_32x4d	in1k	224	0.28	S	25.03	S	Convolution	Conventional	1200000	0.756	0.634	0.235	0.355	0.048	0.318	0.421	0.945	0.883	0.409404	0.401998	0.204247	0.475	0.503	0.8034	0.648	0.374213	0.622743	0.477273	0.531	0.661
twins_pcpvt_base	twins_pcpvt_base	in1k	224	0.28	S	43.83	S	ViT	Conventional	1200000	0.827	0.722	0.34	0.463	0.3	0.456	0.551	0.968	0.92	0.542593	0.47653	0.489694	0.607	0.627	0.8452	0.689	0.443701	0.704572	0.704545	0.635	0.751
twins_pcpvt_large	twins_pcpvt_large	in1k	224	0.28	S	60.99	M	ViT	Conventional	1200000	0.832	0.727	0.35	0.477	0.334	0.472	0.567	0.9694	0.917	0.551839	0.484301	0.514678	0.617	0.636	0.8526	0.701	0.459449	0.70073	0.75	0.653	0.766
twins_pcpvt_small	twins_pcpvt_small	in1k	224	0.28	S	24.11	S	ViT	Conventional	1200000	0.815	0.707	0.314	0.44	0.227	0.422	0.518	0.9622	0.912	0.492622	0.458611	0.421611	0.571	0.593	0.8304	0.67	0.411024	0.646946	0.636364	0.591	0.712
twins_svt_base	twins_svt_base	in1k	224	0.28	S	56.07	M	ViT	Conventional	1200000	0.832	0.726	0.35	0.476	0.332	0.471	0.566	0.9704	0.922	0.514066	0.478592	0.516552	0.608	0.627	0.86	0.701	0.441732	0.687284	0.693182	0.631	0.734
twins_svt_large	twins_svt_large	in1k	224	0.28	S	99.27	M	ViT	Conventional	1200000	0.838	0.734	0.364	0.491	0.372	0.49	0.585	0.9698	0.922	0.557741	0.493023	0.554653	0.632	0.652	0.8632	0.711	0.463976	0.713792	0.715909	0.651	0.754
twins_svt_small	twins_svt_small	in1k	224	0.28	S	24.06	S	ViT	Conventional	1200000	0.819	0.71	0.323	0.448	0.241	0.431	0.526	0.9658	0.906	0.500295	0.458769	0.434728	0.575	0.595	0.8378	0.668	0.4	0.638878	0.625	0.583	0.696
vgg11	vgg11	in1k	224	0.28	S	132.86	L	Convolution	Conventional	1200000	0.659	0.529	0.149	0.263	0.016	0.239	0.363	0.8962	0.797	0.299036	0.303362	0.13679	0.384	0.428	0.7256	0.527	0.235827	0.492509	0.397727	0.413	0.569
vgg11_bn	vgg11_bn	in1k	224	0.28	S	132.87	L	Convolution	Conventional	1200000	0.677	0.545	0.162	0.269	0.017	0.248	0.366	0.9072	0.809	0.34094	0.337932	0.139913	0.407	0.449	0.7356	0.571	0.264961	0.533999	0.465909	0.459	0.624
vgg13	vgg13	in1k	224	0.28	S	133.05	L	Convolution	Conventional	1200000	0.699	0.568	0.161	0.263	0.018	0.253	0.362	0.8988	0.8	0.303954	0.297019	0.14366	0.386	0.429	0.7256	0.553	0.233465	0.472148	0.443182	0.425	0.586
vgg13_bn	vgg13_bn	in1k	224	0.28	S	133.05	L	Convolution	Conventional	1200000	0.704	0.577	0.178	0.291	0.021	0.267	0.379	0.9108	0.829	0.340547	0.335871	0.1599	0.416	0.457	0.741	0.568	0.270669	0.522858	0.431818	0.448	0.605
vgg16	vgg16	in1k	224	0.28	S	138.36	L	Convolution	Conventional	1200000	0.716	0.585	0.175	0.279	0.026	0.266	0.372	0.913	0.83	0.317136	0.310339	0.150531	0.402	0.44	0.7556	0.564	0.260433	0.499808	0.409091	0.433	0.573
vgg16_bn	vgg16_bn	in1k	224	0.28	S	138.37	L	Convolution	Conventional	1200000	0.734	0.607	0.199	0.304	0.027	0.284	0.387	0.9238	0.847	0.347629	0.335712	0.173641	0.426	0.461	0.7622	0.587	0.294488	0.557434	0.465909	0.476	0.625
vgg19	vgg19	in1k	224	0.28	S	143.67	L	Convolution	Conventional	1200000	0.708	0.578	0.179	0.294	0.021	0.268	0.379	0.9112	0.847	0.323628	0.316841	0.161774	0.412	0.452	0.7546	0.574	0.272835	0.506723	0.443182	0.449	0.595
vgg19_bn	vgg19_bn	in1k	224	0.28	S	143.68	L	Convolution	Conventional	1200000	0.73	0.608	0.211	0.33	0.029	0.295	0.404	0.9284	0.849	0.392878	0.381541	0.179888	0.451	0.486	0.7672	0.609	0.326181	0.59854	0.522727	0.514	0.67
visformer_small	visformer_small	in1k	224	0.28	S	40.22	S	ViT	Conventional	1200000	0.822	0.713	0.329	0.454	0.258	0.439	0.534	0.9654	0.907	0.46685	0.454171	0.465334	0.573	0.594	0.8434	0.649	0.398819	0.629658	0.670455	0.587	0.696
vit_base_patch16_224	vit_base_patch16_224.augreg_in1k	in21k	224	0.28	S	86.57	M	ViT	Conventional	14200000	0.843	0.741	0.383	0.512	0.433	0.517	0.613	0.9632	0.912	0.490065	0.53346	0.482823	0.605	0.628	0.7902	0.635	0.339567	0.652324	0.590909	0.554	0.701
vit_base_patch16_224_miil	vit_base_patch16_224_miil.in21k_ft_in1k	in21k	224	0.28	S	86.54	M	ViT	Conventional	14200000	0.834	0.729	0.354	0.48	0.345	0.477	0.572	0.6846	0.559	0.159158	0.247542	0.165522	0.283	0.413	0.4422	0.284	0.130906	0.325394	0.295455	0.259	0.586
vit_base_patch16_224_sam	vit_base_patch16_224_sam	in21k	224	0.28	S	86.54	M	ViT	Conventional	14200000	0.785	0.669	0.269	0.393	0.09	0.355	0.452	0.9394	0.869	0.346842	0.404377	0.234853	0.464	0.494	0.8082	0.615	0.369291	0.636573	0.511364	0.533	0.659
vit_base_patch16_384	vit_base_patch16_384.augreg_in1k	in21k	384	0.48	M	86.86	M	ViT	Conventional	14200000	0.865	0.769	0.499	0.654	0.637	0.64	0.74	0.974	0.924	0.413732	0.521725	0.634603	0.624	0.641	0.8128	0.677	0.307283	0.62159	0.704545	0.578	0.711
vit_base_patch16_rpn_224	vit_base_patch16_rpn_224.in1k	in21k	224	0.28	S	86.54	M	ViT	Conventional	14200000	0.821	0.711	0.327	0.452	0.251	0.435	0.53	0.9592	0.904	0.486327	0.478909	0.409744	0.57	0.594	0.822	0.643	0.418307	0.706108	0.556818	0.581	0.707
vit_base_patch32_224	vit_base_patch32_224.sam	in21k	224	0.28	S	88.22	M	ViT	Conventional	14200000	0.815	0.706	0.313	0.439	0.224	0.421	0.517	0.9424	0.884	0.446783	0.472566	0.342286	0.536	0.569	0.7274	0.542	0.320276	0.626585	0.420455	0.477	0.656
vit_base_patch32_224_sam	vit_base_patch32_224_sam	in21k	224	0.28	S	88.22	M	ViT	Conventional	14200000	0.755	0.632	0.23	0.351	0.043	0.314	0.416	0.8828	0.771	0.258705	0.369014	0.137414	0.384	0.435	0.6988	0.474	0.274016	0.587399	0.409091	0.436	0.624
vit_base_patch32_384	vit_base_patch32_384.augreg_in1k	in21k	384	0.48	M	88.3	M	ViT	Conventional	14200000	0.837	0.733	0.363	0.49	0.371	0.489	0.584	0.9624	0.904	0.424749	0.49112	0.492817	0.578	0.601	0.7964	0.638	0.355118	0.62889	0.590909	0.553	0.694
vit_base_patch8_224	vit_base_patch8_224.augreg_in21k_ft_in1k	in21k	224	0.28	S	86.58	M	ViT	Conventional	14200000	0.858	0.763	0.469	0.61	0.589	0.608	0.709	0.9662	0.918	0.315365	0.509356	0.540287	0.571	0.591	0.8052	0.636	0.275	0.635805	0.602273	0.537	0.667
vit_base_r50_s16_384	vit_base_r50_s16_384.orig_in21k_ft_in1k	in21k	384	0.48	M	98.95	M	ViT	Conventional	14200000	0.855	0.758	0.435	0.575	0.546	0.579	0.677	0.9768	0.938	0.674995	0.573422	0.701437	0.722	0.739	0.8472	0.72	0.465551	0.727238	0.784091	0.674	0.796
vit_large_patch16_224	vit_large_patch16_224.augreg_in21k_ft_in1k	in21k	224	0.28	S	304.33	L	ViT	Conventional	14200000	0.855	0.759	0.438	0.578	0.556	0.583	0.682	0.9776	0.947	0.723195	0.637647	0.603998	0.728	0.745	0.8356	0.672	0.494685	0.780254	0.670455	0.654	0.783
vit_large_patch16_384	vit_large_patch16_384.augreg_in21k_ft_in1k	in21k	384	0.48	M	304.72	L	ViT	Conventional	14200000	0.874	0.785	0.55	0.733	0.712	0.695	0.795	0.982	0.949	0.720441	0.663178	0.782011	0.779	0.793	0.8528	0.71	0.490354	0.785248	0.840909	0.707	0.829
vit_large_patch32_384	vit_large_patch32_384.orig_in21k_ft_in1k	in21k	384	0.48	M	306.63	L	ViT	Conventional	14200000	0.839	0.736	0.366	0.495	0.389	0.497	0.592	0.9598	0.909	0.383042	0.441484	0.509057	0.561	0.584	0.7596	0.606	0.32815	0.593546	0.715909	0.561	0.739
vit_large_r50_s32_224	vit_large_r50_s32_224.augreg_in21k_ft_in1k	in21k	224	0.28	S	328.99	L	ViT	Conventional	14200000	0.842	0.74	0.377	0.505	0.417	0.51	0.606	0.9766	0.932	0.717096	0.603235	0.560275	0.703	0.72	0.8216	0.674	0.489764	0.772186	0.681818	0.654	0.796
vit_large_r50_s32_384	vit_large_r50_s32_384.augreg_in21k_ft_in1k	in21k	384	0.48	M	329.09	L	ViT	Conventional	14200000	0.863	0.767	0.487	0.639	0.615	0.627	0.727	0.9828	0.947	0.736573	0.660799	0.736415	0.77	0.783	0.8518	0.7	0.505118	0.779101	0.738636	0.681	0.799
vit_relpos_base_patch16_224	vit_relpos_base_patch16_224.sw_in1k	in1k	224	0.28	S	86.43	M	ViT	Conventional	1200000	0.824	0.716	0.334	0.459	0.273	0.446	0.541	0.9598	0.916	0.547708	0.50666	0.435353	0.601	0.626	0.8262	0.641	0.439764	0.70534	0.568182	0.589	0.713
vit_relpos_base_patch16_clsgap_224	vit_relpos_base_patch16_clsgap_224.sw_in1k	in1k	224	0.28	S	86.43	M	ViT	Conventional	1200000	0.826	0.721	0.34	0.463	0.297	0.455	0.551	0.9614	0.912	0.536494	0.510625	0.442224	0.6	0.624	0.8298	0.642	0.466339	0.719554	0.602273	0.608	0.733
vit_relpos_base_patch32_plus_rpn_256	vit_relpos_base_patch32_plus_rpn_256.sw_in1k	in1k	256	0.32	M	119.42	L	ViT	Conventional	1200000	0.803	0.691	0.297	0.418	0.152	0.39	0.486	0.9366	0.861	0.403895	0.432445	0.297314	0.499	0.533	0.7754	0.56	0.359646	0.651172	0.443182	0.503	0.649
vit_relpos_medium_patch16_224	vit_relpos_medium_patch16_224.sw_in1k	in1k	224	0.28	S	38.75	S	ViT	Conventional	1200000	0.825	0.718	0.335	0.46	0.288	0.45	0.545	0.9594	0.908	0.488688	0.482239	0.425359	0.576	0.6	0.8214	0.646	0.425197	0.702651	0.636364	0.603	0.734
vit_relpos_medium_patch16_cls_224	vit_relpos_medium_patch16_cls_224.sw_in1k	in1k	224	0.28	S	38.76	S	ViT	Conventional	1200000	0.826	0.719	0.338	0.462	0.293	0.453	0.548	0.957	0.893	0.512493	0.482715	0.423485	0.578	0.604	0.8172	0.629	0.413976	0.692662	0.590909	0.582	0.712
vit_relpos_medium_patch16_rpn_224	vit_relpos_medium_patch16_rpn_224.sw_in1k	in1k	224	0.28	S	38.73	S	ViT	Conventional	1200000	0.822	0.712	0.329	0.454	0.255	0.438	0.533	0.9544	0.892	0.444029	0.454646	0.379138	0.542	0.568	0.8024	0.632	0.378543	0.667691	0.647727	0.581	0.724
vit_relpos_small_patch16_224	vit_relpos_small_patch16_224.sw_in1k	in1k	224	0.28	S	21.98	S	ViT	Conventional	1200000	0.819	0.709	0.323	0.447	0.24	0.43	0.525	0.9552	0.898	0.430454	0.446876	0.381636	0.539	0.564	0.7944	0.617	0.380709	0.668075	0.613636	0.57	0.718
vit_small_patch16_224	vit_small_patch16_224.augreg_in1k	in1k	224	0.28	S	22.05	S	ViT	Conventional	14200000	0.76288	0.6349	0.195917	0.3504	0.0969333	0.32	0.419	0.9422	0.867	0.364155	0.381224	0.282948	0.474	0.503	0.7868	0.615	0.333465	0.605455	0.465909	0.505	0.642
vit_small_patch16_224	vit_small_patch16_224.augreg_in21k_ft_in1k	in21k	224	0.28	S	22.05	S	ViT	Conventional	14200000	0.78032	0.6616	0.219399	0.408433	0.184933	0.369	0.473	0.9574	0.904	0.408223	0.455756	0.405372	0.543	0.567	0.7636	0.59	0.315945	0.58932	0.545455	0.51	0.668
vit_small_patch16_384	vit_small_patch16_384.augreg_in1k	in21k	384	0.48	M	22.2	S	ViT	Conventional	14200000	0.847	0.745	0.396	0.524	0.459	0.531	0.627	0.9646	0.92	0.37832	0.476213	0.55153	0.582	0.603	0.7982	0.635	0.323031	0.595851	0.647727	0.55	0.689
vit_small_patch32_224	vit_small_patch32_224.augreg_in21k_ft_in1k	in21k	224	0.28	S	22.88	S	ViT	Conventional	14200000	0.794	0.68	0.284	0.404	0.115	0.371	0.467	0.9078	0.814	0.248082	0.367745	0.256715	0.422	0.465	0.6612	0.478	0.200591	0.504034	0.284091	0.367	0.555
vit_small_patch32_384	vit_small_patch32_384.augreg_in21k_ft_in1k	in21k	384	0.48	M	22.92	S	ViT	Conventional	14200000	0.818	0.709	0.32	0.445	0.238	0.428	0.523	0.942	0.873	0.274641	0.40184	0.36727	0.479	0.508	0.7448	0.57	0.241535	0.542451	0.522727	0.469	0.63
vit_small_r26_s32_224	vit_small_r26_s32_224.augreg_in21k_ft_in1k	in21k	224	0.28	S	36.43	S	ViT	Conventional	14200000	0.819	0.71	0.323	0.448	0.241	0.431	0.526	0.965	0.91	0.602597	0.516334	0.41599	0.611	0.633	0.8046	0.633	0.409055	0.658087	0.579545	0.57	0.708
vit_small_r26_s32_384	vit_small_r26_s32_384.augreg_in21k_ft_in1k	in21k	384	0.48	M	36.47	S	ViT	Conventional	14200000	0.846	0.745	0.395	0.524	0.457	0.53	0.626	0.9752	0.942	0.638403	0.574056	0.635853	0.698	0.716	0.8286	0.68	0.431299	0.687284	0.647727	0.612	0.739
vit_srelpos_medium_patch16_224	vit_srelpos_medium_patch16_224.sw_in1k	in1k	224	0.28	S	38.74	S	ViT	Conventional	1200000	0.822	0.712	0.328	0.453	0.254	0.437	0.532	0.9592	0.901	0.480228	0.466857	0.404122	0.563	0.587	0.8144	0.632	0.408465	0.676527	0.636364	0.588	0.722
vit_srelpos_small_patch16_224	vit_srelpos_small_patch16_224.sw_in1k	in1k	224	0.28	S	21.97	S	ViT	Conventional	1200000	0.815	0.707	0.314	0.44	0.229	0.423	0.519	0.9496	0.893	0.435176	0.451158	0.359775	0.535	0.563	0.7922	0.616	0.377953	0.657318	0.579545	0.558	0.704
vit_tiny_patch16_224	vit_tiny_patch16_224.augreg_in21k_ft_in1k	in21k	224	0.28	S	5.72	S	ViT	Conventional	14200000	0.785	0.67	0.269	0.393	0.091	0.356	0.454	0.8266	0.735	0.133976	0.277989	0.186758	0.333	0.403	0.6086	0.439	0.120669	0.387245	0.375	0.33	0.542
vit_tiny_patch16_384	vit_tiny_patch16_384.augreg_in21k_ft_in1k	in21k	384	0.48	M	5.79	S	ViT	Conventional	14200000	0.809	0.699	0.306	0.429	0.18	0.404	0.499	0.862	0.785	0.10545	0.2902	0.259838	0.36	0.418	0.666	0.508	0.105118	0.38302	0.454545	0.363	0.545
vit_tiny_r_s16_p8_224	vit_tiny_r_s16_p8_224.augreg_in21k_ft_in1k	in21k	224	0.28	S	6.34	S	ViT	Conventional	14200000	0.765	0.643	0.24	0.361	0.051	0.324	0.424	0.9172	0.825	0.365926	0.356962	0.213616	0.44	0.48	0.7048	0.508	0.261811	0.50557	0.397727	0.418	0.593
vit_tiny_r_s16_p8_384	vit_tiny_r_s16_p8_384.augreg_in21k_ft_in1k	in21k	384	0.48	M	6.36	S	ViT	Conventional	14200000	0.793	0.678	0.283	0.404	0.111	0.369	0.465	0.943	0.895	0.417077	0.388519	0.306059	0.502	0.532	0.7636	0.591	0.298031	0.533615	0.443182	0.466	0.61
volo_d1_224	volo_d1_224	in1k	224	0.28	S	26.63	S	ViT	Conventional	1200000	0.839	0.737	0.369	0.495	0.389	0.498	0.594	0.9738	0.922	0.573283	0.499207	0.573392	0.642	0.659	0.8602	0.722	0.484055	0.733	0.75	0.672	0.781
volo_d1_384	volo_d1_384	in1k	384	0.48	M	26.78	S	ViT	Conventional	1200000	0.854	0.758	0.434	0.574	0.543	0.577	0.676	0.9772	0.932	0.58371	0.508722	0.689569	0.679	0.695	0.8726	0.731	0.493504	0.733385	0.806818	0.691	0.792
volo_d2_224	volo_d2_224	in1k	224	0.28	S	58.68	M	ViT	Conventional	1200000	0.847	0.746	0.396	0.524	0.461	0.532	0.628	0.9746	0.928	0.569152	0.513796	0.630856	0.66	0.677	0.8748	0.724	0.487402	0.733769	0.738636	0.671	0.767
volo_d2_384	volo_d2_384	in1k	384	0.48	M	58.87	M	ViT	Conventional	1200000	0.858	0.763	0.462	0.607	0.586	0.605	0.705	0.9776	0.939	0.560889	0.518712	0.745159	0.691	0.707	0.8826	0.742	0.500197	0.73761	0.840909	0.705	0.799
volo_d3_224	volo_d3_224	in1k	224	0.28	S	86.33	M	ViT	Conventional	1200000	0.851	0.752	0.41	0.537	0.503	0.551	0.647	0.975	0.94	0.610663	0.527751	0.667708	0.687	0.705	0.8764	0.73	0.518701	0.760661	0.795455	0.701	0.8
volo_d3_448	volo_d3_448	in1k	448	0.56	L	86.63	M	ViT	Conventional	1200000	0.865	0.769	0.504	0.657	0.654	0.646	0.747	0.9768	0.939	0.609679	0.543768	0.78451	0.719	0.736	0.8848	0.759	0.527362	0.766808	0.886364	0.735	0.831
volo_d4_224	volo_d4_224	in1k	224	0.28	S	192.96	L	ViT	Conventional	1200000	0.852	0.755	0.423	0.547	0.529	0.564	0.662	0.9766	0.939	0.640567	0.558357	0.690194	0.707	0.724	0.8804	0.738	0.533661	0.775643	0.806818	0.714	0.811
volo_d4_448	volo_d4_448	in1k	448	0.56	L	193.41	L	ViT	Conventional	1200000	0.868	0.771	0.515	0.67	0.667	0.656	0.756	0.9802	0.937	0.637419	0.562004	0.805122	0.735	0.75	0.8866	0.76	0.531496	0.773338	0.897727	0.741	0.836
volo_d5_224	volo_d5_224	in1k	224	0.28	S	295.46	L	ViT	Conventional	1200000	0.857	0.761	0.456	0.588	0.571	0.594	0.693	0.975	0.939	0.66083	0.5804	0.721424	0.725	0.744	0.8836	0.741	0.533268	0.7864	0.829545	0.723	0.818
volo_d5_448	volo_d5_448	in1k	448	0.56	L	295.91	L	ViT	Conventional	1200000	0.87	0.777	0.526	0.69	0.681	0.669	0.769	0.9792	0.939	0.663978	0.59039	0.823235	0.754	0.77	0.8904	0.76	0.536614	0.778333	0.875	0.737	0.828
volo_d5_512	volo_d5_512	in1k	512	0.64	L	296.09	L	ViT	Conventional	1200000	0.871	0.779	0.544	0.71	0.697	0.683	0.784	0.978	0.939	0.670273	0.593879	0.836977	0.76	0.777	0.8912	0.761	0.538976	0.781022	0.863636	0.736	0.826
wide_resnet101_2	wide_resnet101_2	in1k	224	0.28	S	126.89	L	Convolution	Conventional	1200000	0.779	0.662	0.259	0.382	0.074	0.344	0.442	0.9496	0.879	0.449144	0.423882	0.229232	0.495	0.521	0.8144	0.642	0.389764	0.636957	0.488636	0.539	0.662
wide_resnet50_2	wide_resnet50_2	in1k	224	0.28	S	68.88	M	Convolution	Conventional	1200000	0.805	0.694	0.3	0.423	0.163	0.395	0.491	0.9612	0.911	0.506591	0.465747	0.349157	0.558	0.581	0.837	0.686	0.435827	0.681905	0.590909	0.599	0.716
wide_resnet50_2	wide_resnet50_2	in1k	224	0.28	S	68.88	M	Convolution	Conventional	1200000	0.785	0.662	0.253	0.387	0.06	0.341	0.434	0.9612	0.911	0.506591	0.465747	0.349157	0.558	0.581	0.837	0.686	0.435827	0.681905	0.590909	0.599	0.716
xception	xception	in1k	299	0.37375	M	22.86	S	Convolution	Conventional	1200000	0.789	0.674	0.274	0.397	0.1	0.361	0.458	0.9124	0.836	0.404682	0.396924	0.173017	0.453	0.496	0.7442	0.578	0.347244	0.597388	0.306818	0.457	0.614
xception41	xception41	in1k	299	0.37375	M	26.97	S	Convolution	Conventional	1200000	0.794	0.68	0.284	0.405	0.116	0.371	0.467	0.3692	0.304	0.129254	0.210752	0.133666	0.194	0.525	0.1984	0.13	0.167913	0.316558	0.272727	0.222	1.119
xception41p	xception41p	in1k	299	0.37375	M	26.91	S	Convolution	Conventional	1200000	0.82	0.711	0.327	0.451	0.248	0.434	0.529	0.959	0.905	0.436947	0.427054	0.373517	0.536	0.559	0.5548	0.366	0.244882	0.403381	0.227273	0.31	0.559
xception65	xception65	in1k	299	0.37375	M	39.92	S	Convolution	Conventional	1200000	0.831	0.726	0.348	0.473	0.328	0.469	0.564	0.9492	0.884	0.557938	0.448938	0.29544	0.547	0.576	0.808	0.628	0.471063	0.724933	0.340909	0.541	0.67
xception65p	xception65p	in1k	299	0.37375	M	39.82	S	Convolution	Conventional	1200000	0.826	0.718	0.337	0.461	0.29	0.452	0.547	0.9528	0.892	0.547708	0.454646	0.308557	0.551	0.578	0.8112	0.653	0.448425	0.708798	0.477273	0.572	0.705
xception71	xception71	in1k	299	0.37375	M	42.34	S	Convolution	Conventional	1200000	0.807	0.697	0.304	0.427	0.17	0.4	0.496	0.2454	0.202	0.0301003	0.121789	0.0843223	0.11	0.448	0.139	0.094	0.0570866	0.19247	0.25	0.148	1.065
xcit_large_24_p16_224	xcit_large_24_p16_224	in1k	224	0.28	S	189.1	L	ViT	Conventional	1200000	0.831	0.726	0.348	0.472	0.328	0.469	0.564	0.9644	0.913	0.532756	0.477006	0.5203	0.611	0.634	0.8536	0.679	0.446063	0.683442	0.738636	0.637	0.746
xcit_large_24_p16_224_dist	xcit_large_24_p16_224_dist	in1k	224	0.28	S	189.1	L	ViT	Conventional	1200000	0.838	0.735	0.364	0.493	0.377	0.492	0.587	0.9744	0.934	0.607909	0.5536	0.591505	0.672	0.69	0.8662	0.715	0.516339	0.761429	0.75	0.686	0.792
xcit_large_24_p16_384_dist	xcit_large_24_p16_384_dist	in1k	384	0.48	M	189.1	L	ViT	Conventional	1200000	0.852	0.755	0.42	0.545	0.528	0.562	0.66	0.968	0.92	0.618139	0.552807	0.505309	0.649	0.67	0.8538	0.705	0.533661	0.773338	0.681818	0.673	0.788
xcit_large_24_p8_224	xcit_large_24_p8_224	in1k	224	0.28	S	188.93	L	ViT	Conventional	1200000	0.849	0.748	0.398	0.531	0.472	0.537	0.633	0.9706	0.913	0.56266	0.49667	0.642099	0.654	0.674	0.8662	0.722	0.484252	0.709566	0.738636	0.664	0.767
xcit_large_24_p8_224_dist	xcit_large_24_p8_224_dist	in1k	224	0.28	S	188.93	L	ViT	Conventional	1200000	0.849	0.749	0.401	0.533	0.481	0.541	0.637	0.9762	0.937	0.633091	0.585157	0.667083	0.706	0.723	0.8702	0.739	0.534843	0.772186	0.806818	0.713	0.819
xcit_large_24_p8_384_dist	xcit_large_24_p8_384_dist	in1k	384	0.48	M	188.93	L	ViT	Conventional	1200000	0.86	0.764	0.477	0.62	0.599	0.615	0.715	0.972	0.923	0.646075	0.588487	0.569644	0.682	0.702	0.8608	0.722	0.550197	0.784479	0.75	0.702	0.816
xcit_medium_24_p16_224	xcit_medium_24_p16_224	in1k	224	0.28	S	84.4	M	ViT	Conventional	1200000	0.827	0.722	0.34	0.464	0.302	0.457	0.553	0.9662	0.906	0.504427	0.459245	0.485322	0.589	0.61	0.8518	0.686	0.441732	0.664618	0.659091	0.613	0.72
xcit_medium_24_p16_224_dist	xcit_medium_24_p16_224_dist	in1k	224	0.28	S	84.4	M	ViT	Conventional	1200000	0.834	0.729	0.354	0.479	0.343	0.476	0.571	0.9736	0.931	0.581546	0.521567	0.554653	0.647	0.665	0.8624	0.716	0.484646	0.736842	0.761364	0.675	0.783
xcit_medium_24_p16_384_dist	xcit_medium_24_p16_384_dist	in1k	384	0.48	M	84.4	M	ViT	Conventional	1200000	0.851	0.751	0.405	0.536	0.493	0.546	0.642	0.9638	0.915	0.584301	0.524421	0.44722	0.618	0.641	0.8484	0.7	0.500591	0.751441	0.670455	0.656	0.773
xcit_medium_24_p8_224	xcit_medium_24_p8_224	in1k	224	0.28	S	84.32	M	ViT	Conventional	1200000	0.843	0.741	0.382	0.511	0.431	0.516	0.612	0.9682	0.919	0.54279	0.460197	0.591505	0.628	0.649	0.8652	0.715	0.447441	0.674606	0.75	0.647	0.748
xcit_medium_24_p8_224_dist	xcit_medium_24_p8_224_dist	in1k	224	0.28	S	84.32	M	ViT	Conventional	1200000	0.845	0.743	0.391	0.522	0.452	0.527	0.624	0.976	0.935	0.603777	0.542023	0.649594	0.683	0.7	0.8712	0.75	0.51752	0.755282	0.829545	0.713	0.818
xcit_medium_24_p8_384_dist	xcit_medium_24_p8_384_dist	in1k	384	0.48	M	84.32	M	ViT	Conventional	1200000	0.857	0.76	0.442	0.586	0.567	0.589	0.687	0.9684	0.921	0.615975	0.544878	0.555903	0.659	0.681	0.8574	0.731	0.530315	0.765655	0.795455	0.706	0.823
xcit_nano_12_p16_224	xcit_nano_12_p16_224	in1k	224	0.28	S	3.05	S	ViT	Conventional	1200000	0.757	0.635	0.235	0.356	0.049	0.319	0.421	0.909	0.835	0.40783	0.368855	0.190506	0.451	0.496	0.7186	0.565	0.310827	0.562428	0.511364	0.487	0.678
xcit_nano_12_p16_224_dist	xcit_nano_12_p16_224_dist	in1k	224	0.28	S	3.05	S	ViT	Conventional	1200000	0.765	0.644	0.24	0.361	0.052	0.324	0.424	0.9206	0.836	0.416486	0.392166	0.202998	0.462	0.502	0.7534	0.601	0.335433	0.600461	0.5	0.509	0.676
xcit_nano_12_p16_384_dist	xcit_nano_12_p16_384_dist	in1k	384	0.48	M	3.05	S	ViT	Conventional	1200000	0.793	0.679	0.283	0.404	0.112	0.37	0.467	0.8944	0.793	0.408617	0.372502	0.181761	0.439	0.491	0.7078	0.56	0.324213	0.5801	0.443182	0.477	0.674
xcit_nano_12_p8_224	xcit_nano_12_p8_224	in1k	224	0.28	S	3.05	S	ViT	Conventional	1200000	0.791	0.675	0.277	0.398	0.103	0.363	0.459	0.934	0.862	0.411568	0.365208	0.28045	0.48	0.514	0.7546	0.628	0.330315	0.56358	0.465909	0.497	0.659
xcit_nano_12_p8_224_dist	xcit_nano_12_p8_224_dist	in1k	224	0.28	S	3.05	S	ViT	Conventional	1200000	0.792	0.676	0.28	0.4	0.108	0.366	0.462	0.9458	0.861	0.437143	0.393435	0.282948	0.494	0.522	0.7874	0.628	0.359252	0.601229	0.579545	0.542	0.688
xcit_nano_12_p8_384_dist	xcit_nano_12_p8_384_dist	in1k	384	0.48	M	3.05	S	ViT	Conventional	1200000	0.812	0.704	0.311	0.435	0.198	0.412	0.507	0.9222	0.837	0.424356	0.389946	0.237352	0.472	0.512	0.7594	0.611	0.355512	0.593546	0.511364	0.518	0.682
xcit_small_12_p16_224	xcit_small_12_p16_224	in1k	224	0.28	S	26.25	S	ViT	Conventional	1200000	0.821	0.712	0.328	0.453	0.252	0.436	0.531	0.967	0.898	0.517018	0.459404	0.459713	0.584	0.604	0.8434	0.681	0.430118	0.672685	0.590909	0.594	0.704
xcit_small_12_p16_224_dist	xcit_small_12_p16_224_dist	in1k	224	0.28	S	26.25	S	ViT	Conventional	1200000	0.823	0.716	0.333	0.459	0.271	0.445	0.541	0.9692	0.92	0.547315	0.498414	0.467833	0.608	0.627	0.8462	0.695	0.475	0.708413	0.704545	0.646	0.763
xcit_small_12_p16_384_dist	xcit_small_12_p16_384_dist	in1k	384	0.48	M	26.25	S	ViT	Conventional	1200000	0.843	0.741	0.384	0.512	0.433	0.518	0.614	0.9588	0.895	0.555774	0.496353	0.389132	0.584	0.609	0.8306	0.672	0.483465	0.720707	0.545455	0.605	0.728
xcit_small_12_p8_224	xcit_small_12_p8_224	in1k	224	0.28	S	26.21	S	ViT	Conventional	1200000	0.838	0.734	0.364	0.492	0.375	0.491	0.586	0.9696	0.918	0.5542	0.468126	0.560899	0.625	0.645	0.8572	0.711	0.449606	0.688436	0.727273	0.644	0.751
xcit_small_12_p8_224_dist	xcit_small_12_p8_224_dist	in1k	224	0.28	S	26.21	S	ViT	Conventional	1200000	0.838	0.735	0.366	0.494	0.382	0.494	0.589	0.9734	0.925	0.565611	0.514748	0.574641	0.645	0.663	0.8602	0.721	0.493307	0.723396	0.738636	0.669	0.778
xcit_small_12_p8_384_dist	xcit_small_12_p8_384_dist	in1k	384	0.48	M	26.21	S	ViT	Conventional	1200000	0.851	0.753	0.41	0.539	0.506	0.552	0.649	0.9644	0.903	0.572693	0.513479	0.487196	0.619	0.642	0.8502	0.7	0.509055	0.742221	0.704545	0.664	0.781
xcit_small_24_p16_224	xcit_small_24_p16_224	in1k	224	0.28	S	47.67	S	ViT	Conventional	1200000	0.825	0.717	0.334	0.459	0.283	0.448	0.543	0.9684	0.913	0.503049	0.451792	0.488445	0.589	0.608	0.8528	0.677	0.458661	0.686516	0.636364	0.615	0.721
xcit_small_24_p16_224_dist	xcit_small_24_p16_224_dist	in1k	224	0.28	S	47.67	S	ViT	Conventional	1200000	0.828	0.722	0.341	0.465	0.305	0.458	0.553	0.9722	0.924	0.564824	0.504757	0.504685	0.625	0.643	0.8556	0.703	0.485039	0.721091	0.715909	0.656	0.767
xcit_small_24_p16_384_dist	xcit_small_24_p16_384_dist	in1k	384	0.48	M	47.67	S	ViT	Conventional	1200000	0.848	0.747	0.398	0.531	0.469	0.536	0.632	0.9622	0.91	0.567578	0.49667	0.416615	0.598	0.621	0.8418	0.694	0.498819	0.729927	0.636364	0.64	0.76
xcit_small_24_p8_224	xcit_small_24_p8_224	in1k	224	0.28	S	47.63	S	ViT	Conventional	1200000	0.842	0.74	0.378	0.505	0.418	0.51	0.606	0.9682	0.918	0.536297	0.468918	0.590881	0.629	0.65	0.863	0.715	0.47126	0.713408	0.715909	0.654	0.758
xcit_small_24_p8_224_dist	xcit_small_24_p8_224_dist	in1k	224	0.28	S	47.63	S	ViT	Conventional	1200000	0.842	0.74	0.378	0.506	0.419	0.511	0.607	0.9746	0.931	0.587448	0.524738	0.601499	0.661	0.678	0.867	0.737	0.504921	0.743757	0.784091	0.692	0.798
xcit_small_24_p8_384_dist	xcit_small_24_p8_384_dist	in1k	384	0.48	M	47.63	S	ViT	Conventional	1200000	0.854	0.757	0.432	0.568	0.543	0.575	0.673	0.9678	0.917	0.601023	0.521725	0.510306	0.638	0.659	0.8534	0.713	0.512402	0.755667	0.727273	0.677	0.793
xcit_tiny_12_p16_224	xcit_tiny_12_p16_224	in1k	224	0.28	S	6.72	S	ViT	Conventional	1200000	0.792	0.677	0.28	0.401	0.11	0.367	0.463	0.9456	0.878	0.470195	0.420235	0.28732	0.514	0.544	0.7868	0.631	0.367913	0.620438	0.556818	0.544	0.691
xcit_tiny_12_p16_224_dist	xcit_tiny_12_p16_224_dist	in1k	224	0.28	S	6.72	S	ViT	Conventional	1200000	0.796	0.682	0.286	0.406	0.12	0.374	0.47	0.951	0.896	0.497147	0.442594	0.297314	0.533	0.56	0.8068	0.641	0.406102	0.635805	0.568182	0.563	0.698
xcit_tiny_12_p16_384_dist	xcit_tiny_12_p16_384_dist	in1k	384	0.48	M	6.72	S	ViT	Conventional	1200000	0.82	0.71	0.325	0.451	0.244	0.433	0.528	0.9364	0.858	0.492229	0.427054	0.257964	0.509	0.544	0.7734	0.603	0.40374	0.641952	0.534091	0.546	0.706
xcit_tiny_12_p8_224	xcit_tiny_12_p8_224	in1k	224	0.28	S	6.71	S	ViT	Conventional	1200000	0.814	0.705	0.313	0.438	0.21	0.417	0.512	0.9572	0.901	0.471769	0.40961	0.393504	0.544	0.568	0.819	0.67	0.394094	0.627737	0.590909	0.571	0.697
xcit_tiny_12_p8_224_dist	xcit_tiny_12_p8_224_dist	in1k	224	0.28	S	6.71	S	ViT	Conventional	1200000	0.815	0.706	0.313	0.438	0.221	0.42	0.515	0.9582	0.906	0.520952	0.439899	0.437851	0.576	0.601	0.832	0.686	0.42185	0.656166	0.659091	0.606	0.728
xcit_tiny_12_p8_384_dist	xcit_tiny_12_p8_384_dist	in1k	384	0.48	M	6.71	S	ViT	Conventional	1200000	0.834	0.729	0.354	0.481	0.347	0.478	0.573	0.9496	0.882	0.518591	0.437203	0.350406	0.547	0.576	0.809	0.665	0.421457	0.661929	0.545455	0.573	0.708
xcit_tiny_24_p16_224	xcit_tiny_24_p16_224	in1k	224	0.28	S	12.12	S	ViT	Conventional	1200000	0.805	0.694	0.3	0.423	0.163	0.395	0.491	0.9554	0.903	0.498721	0.431652	0.352904	0.547	0.573	0.8158	0.663	0.413189	0.642336	0.556818	0.569	0.697
xcit_tiny_24_p16_224_dist	xcit_tiny_24_p16_224_dist	in1k	224	0.28	S	12.12	S	ViT	Conventional	1200000	0.808	0.697	0.304	0.428	0.172	0.4	0.495	0.9594	0.909	0.508361	0.465271	0.364147	0.562	0.586	0.8196	0.674	0.443898	0.674606	0.636364	0.607	0.741
xcit_tiny_24_p16_384_dist	xcit_tiny_24_p16_384_dist	in1k	384	0.48	M	12.12	S	ViT	Conventional	1200000	0.832	0.727	0.351	0.477	0.338	0.473	0.569	0.9486	0.887	0.50482	0.452268	0.32792	0.543	0.572	0.8026	0.649	0.450787	0.674606	0.579545	0.588	0.733
xcit_tiny_24_p8_224	xcit_tiny_24_p8_224	in1k	224	0.28	S	12.11	S	ViT	Conventional	1200000	0.825	0.717	0.335	0.46	0.287	0.45	0.545	0.9662	0.909	0.50423	0.428957	0.479076	0.58	0.6	0.837	0.694	0.423228	0.649635	0.659091	0.606	0.724
xcit_tiny_24_p8_224_dist	xcit_tiny_24_p8_224_dist	in1k	224	0.28	S	12.11	S	ViT	Conventional	1200000	0.825	0.717	0.335	0.46	0.287	0.45	0.545	0.9668	0.92	0.54456	0.46543	0.476577	0.602	0.623	0.8432	0.696	0.455512	0.682674	0.738636	0.643	0.763
xcit_tiny_24_p8_384_dist	xcit_tiny_24_p8_384_dist	in1k	384	0.48	M	12.11	S	ViT	Conventional	1200000	0.843	0.74	0.38	0.509	0.425	0.514	0.61	0.9578	0.899	0.545151	0.454805	0.404122	0.576	0.601	0.8244	0.66	0.448819	0.679216	0.681818	0.617	0.748

## Sheet: RN50_comparable
name	updated_name	dataset	image_size	image_size_rat	image_size_cat	param_count	size	architecture	technique	dataset-size	imagenet-zeroshot-val-top1	imagenetv2-zeroshot-val-top1	imagenets-zeroshot-val-top1	imagenetr-zeroshot-val-top1	imageneta-zeroshot-val-top1	imagenet-average-robustness	imagenet-effective-robustness	in100-zeroshot-val-top1	in100v2-zeroshot-val-top1	in100s-zeroshot-val-top1	in100r-zeroshot-val-top1	in100a-zeroshot-val-top1	in100-average-robustness	in100-effective-robustness	in100-dogs-zeroshot-val-top1	in100-dogs-v2-zeroshot-val-top1	in100-dogs-s-zeroshot-val-top1	in100-dogs-r-zeroshot-val-top1	in100-dogs-a-zeroshot-val-top1	in100-dogs-average-robustness	in100-dogs-effective-robustness
gcvit_tiny.in1k	gcvit_tiny.in1k	in1k	224	0.28	S	28	S	ViT	Conventional	1200000	0.856	0.698	0.456	0.687	0.693	0.634	0.741	0.968	0.919	0.528	0.485	0.503	0.609	0.629	0.833	0.728	0.35	0.47	0.311	0.465	0.558
volo_d1_224	volo_d1_224	in1k	224	0.28	S	26.63	S	ViT	Conventional	1200000	0.839	0.737	0.369	0.495	0.389	0.498	0.594	0.9738	0.922	0.573283	0.499207	0.573392	0.642	0.659	0.8602	0.722	0.484055	0.733	0.75	0.672	0.781
xcit_small_12_p8_224_dist	xcit_small_12_p8_224_dist	in1k	224	0.28	S	26.21	S	ViT	Conventional	1200000	0.838	0.735	0.366	0.494	0.382	0.494	0.589	0.9734	0.925	0.565611	0.514748	0.574641	0.645	0.663	0.8602	0.721	0.493307	0.723396	0.738636	0.669	0.778
xcit_small_12_p8_224	xcit_small_12_p8_224	in1k	224	0.28	S	26.21	S	ViT	Conventional	1200000	0.838	0.734	0.364	0.492	0.375	0.491	0.586	0.9696	0.918	0.5542	0.468126	0.560899	0.625	0.645	0.8572	0.711	0.449606	0.688436	0.727273	0.644	0.751
xcit_small_12_p16_224_dist	xcit_small_12_p16_224_dist	in1k	224	0.28	S	26.25	S	ViT	Conventional	1200000	0.823	0.716	0.333	0.459	0.271	0.445	0.541	0.9692	0.92	0.547315	0.498414	0.467833	0.608	0.627	0.8462	0.695	0.475	0.708413	0.704545	0.646	0.763
swin_s3_tiny_224	swin_s3_tiny_224	in1k	224	0.28	S	28.33	S	ViT	Conventional	1200000	0.823	0.715	0.331	0.457	0.265	0.442	0.537	0.9648	0.914	0.498721	0.463527	0.452842	0.582	0.603	0.8456	0.668	0.420472	0.664618	0.613636	0.592	0.7
deit3_small_patch16_224	deit3_small_patch16_224	in1k	224	0.28	S	22.06	S	ViT	Conventional	1200000	0.823	0.714	0.33	0.456	0.262	0.441	0.536	0.9612	0.901	0.543577	0.466223	0.422236	0.583	0.607	0.8206	0.657	0.472638	0.678448	0.681818	0.622	0.758
resnetv2_50x1_bit_distilled	resnetv2_50x1_bit_distilled	in1k	224	0.28	S	25.55	S	Convolution	Conventional	1200000	0.821	0.711	0.328	0.453	0.251	0.436	0.531	0.971	0.921	0.521149	0.497463	0.425984	0.591	0.609	0.838	0.685	0.407087	0.688052	0.602273	0.596	0.711
xcit_small_12_p16_224	xcit_small_12_p16_224	in1k	224	0.28	S	26.25	S	ViT	Conventional	1200000	0.821	0.712	0.328	0.453	0.252	0.436	0.531	0.967	0.898	0.517018	0.459404	0.459713	0.584	0.604	0.8434	0.681	0.430118	0.672685	0.590909	0.594	0.704
tnt_s_patch16_224	tnt_s_patch16_224	in1k	224	0.28	S	23.76	S	ViT	Conventional	1200000	0.82	0.71	0.326	0.451	0.247	0.434	0.529	0.9582	0.898	0.470588	0.440533	0.400999	0.553	0.577	0.8024	0.633	0.335827	0.643872	0.625	0.559	0.697
twins_svt_small	twins_svt_small	in1k	224	0.28	S	24.06	S	ViT	Conventional	1200000	0.819	0.71	0.323	0.448	0.241	0.431	0.526	0.9658	0.906	0.500295	0.458769	0.434728	0.575	0.595	0.8378	0.668	0.4	0.638878	0.625	0.583	0.696
swinv2_cr_tiny_ns_224	swinv2_cr_tiny_ns_224	in1k	224	0.28	S	28.33	S	ViT	Conventional	1200000	0.819	0.71	0.324	0.448	0.241	0.431	0.526	0.9648	0.908	0.462719	0.442912	0.467208	0.57	0.591	0.835	0.67	0.395669	0.638878	0.636364	0.585	0.701
vit_relpos_small_patch16_224	vit_relpos_small_patch16_224.sw_in1k	in1k	224	0.28	S	21.98	S	ViT	Conventional	1200000	0.819	0.709	0.323	0.447	0.24	0.43	0.525	0.9552	0.898	0.430454	0.446876	0.381636	0.539	0.564	0.7944	0.617	0.380709	0.668075	0.613636	0.57	0.718
vit_srelpos_small_patch16_224	vit_srelpos_small_patch16_224.sw_in1k	in1k	224	0.28	S	21.97	S	ViT	Conventional	1200000	0.815	0.707	0.314	0.44	0.229	0.423	0.519	0.9496	0.893	0.435176	0.451158	0.359775	0.535	0.563	0.7922	0.616	0.377953	0.657318	0.579545	0.558	0.704
twins_pcpvt_small	twins_pcpvt_small	in1k	224	0.28	S	24.11	S	ViT	Conventional	1200000	0.815	0.707	0.314	0.44	0.227	0.422	0.518	0.9622	0.912	0.492622	0.458611	0.421611	0.571	0.593	0.8304	0.67	0.411024	0.646946	0.636364	0.591	0.712
pit_s_distilled_224	pit_s_distilled_224	in1k	224	0.28	S	24.04	S	ViT	Conventional	1200000	0.815	0.706	0.313	0.439	0.224	0.421	0.517	0.962	0.913	0.550069	0.510466	0.420987	0.599	0.623	0.8324	0.688	0.456299	0.711871	0.625	0.62	0.745
pit_s_224	pit_s_224	in1k	224	0.28	S	23.46	S	ViT	Conventional	1200000	0.814	0.705	0.313	0.438	0.211	0.417	0.512	0.9608	0.908	0.512493	0.460831	0.405996	0.572	0.595	0.826	0.644	0.433071	0.672301	0.613636	0.591	0.715
swin_tiny_patch4_window7_224	swin_tiny_patch4_window7_224	in1k	224	0.28	S	28.29	S	ViT	Conventional	1200000	0.814	0.706	0.313	0.438	0.211	0.417	0.512	0.9618	0.908	0.481605	0.449255	0.42411	0.566	0.588	0.8324	0.659	0.38937	0.640031	0.579545	0.567	0.681
deit_small_distilled_patch16_224	deit_small_distilled_patch16_224	in1k	224	0.28	S	22.44	S	ViT	Conventional	1200000	0.813	0.705	0.312	0.437	0.207	0.415	0.51	0.9614	0.917	0.524493	0.488265	0.405372	0.584	0.607	0.8326	0.679	0.452953	0.724164	0.670455	0.632	0.759
deit_small_patch16_224	deit_small_patch16_224	in1k	224	0.28	S	22.05	S	ViT	Conventional	1200000	0.81	0.701	0.309	0.432	0.189	0.408	0.504	0.957	0.893	0.48613	0.441484	0.387883	0.552	0.577	0.8134	0.657	0.411417	0.68229	0.556818	0.577	0.709
seresnext50_32x4d	seresnext50_32x4d	in1k	224	0.28	S	27.56	S	Convolution	Conventional	1200000	0.81	0.7	0.308	0.431	0.184	0.406	0.501	0.9632	0.906	0.504033	0.451792	0.369144	0.558	0.579	0.8308	0.677	0.434843	0.676143	0.522727	0.578	0.696
resnest50d_1s4x24d	resnest50d_1s4x24d	in1k	224	0.28	S	25.68	S	Convolution	Conventional	1200000	0.809	0.698	0.306	0.429	0.177	0.403	0.498	0.9566	0.906	0.506787	0.489375	0.350406	0.563	0.589	0.8312	0.663	0.448622	0.712255	0.613636	0.609	0.733
resnest50d	resnest50d	in1k	224	0.28	S	27.48	S	Convolution	Conventional	1200000	0.809	0.698	0.306	0.428	0.174	0.402	0.497	0.9554	0.903	0.508164	0.486362	0.371018	0.567	0.593	0.8262	0.679	0.440354	0.692662	0.568182	0.595	0.72
skresnext50_32x4d	skresnext50_32x4d	in1k	224	0.28	S	27.48	S	Convolution	Conventional	1200000	0.803	0.692	0.297	0.419	0.153	0.39	0.486	0.9554	0.896	0.447374	0.431177	0.324172	0.525	0.55	0.825	0.663	0.38189	0.61967	0.568182	0.558	0.676
resnext50_32x4d	resnext50_32x4d	in1k	224	0.28	S	25.03	S	Convolution	Conventional	1200000	0.802	0.69	0.295	0.416	0.145	0.387	0.483	0.9614	0.905	0.452489	0.428164	0.341661	0.532	0.553	0.8382	0.673	0.406693	0.627737	0.545455	0.563	0.672
poolformer_s24	poolformer_s24	in1k	224	0.28	S	21.39	S	ViT	Conventional	1200000	0.802	0.689	0.294	0.415	0.143	0.385	0.48	0.9554	0.902	0.46744	0.442277	0.343535	0.539	0.564	0.8226	0.654	0.409646	0.642336	0.602273	0.577	0.701
seresnet50	seresnet50	in1k	224	0.28	S	28.09	S	Convolution	Conventional	1200000	0.802	0.688	0.294	0.415	0.141	0.385	0.48	0.9572	0.905	0.48672	0.451633	0.322299	0.541	0.565	0.8252	0.661	0.425	0.660776	0.431818	0.545	0.66
gernet_m	gernet_m	in1k	224	0.28	S	21.14	S	Convolution	Conventional	1200000	0.801	0.688	0.294	0.414	0.141	0.384	0.479	0.9588	0.901	0.507968	0.489692	0.317302	0.554	0.578	0.8302	0.653	0.43189	0.676527	0.545455	0.577	0.695
gluon_seresnext50_32x4d	gluon_seresnext50_32x4d	in1k	224	0.28	S	27.56	S	Convolution	Conventional	1200000	0.8	0.687	0.293	0.413	0.136	0.382	0.478	0.956	0.893	0.46685	0.45084	0.300437	0.528	0.552	0.8286	0.646	0.41378	0.679985	0.579545	0.58	0.7
resnet50_gn	resnet50_gn	in1k	224	0.28	S	25.56	S	Convolution	Conventional	1200000	0.799	0.687	0.292	0.413	0.135	0.382	0.478	0.9528	0.9	0.485343	0.423248	0.309806	0.53	0.556	0.8296	0.664	0.408071	0.635421	0.511364	0.555	0.669
ese_vovnet39b	ese_vovnet39b	in1k	224	0.28	S	24.57	S	Convolution	Conventional	1200000	0.799	0.687	0.291	0.411	0.133	0.381	0.477	0.9558	0.89	0.499311	0.434824	0.302311	0.532	0.557	0.8124	0.644	0.422441	0.657318	0.522727	0.562	0.692
resnet50d	resnet50d	in1k	224	0.28	S	25.58	S	Convolution	Conventional	1200000	0.795	0.681	0.286	0.405	0.117	0.372	0.468	0.9554	0.899	0.504033	0.459404	0.297314	0.54	0.565	0.83	0.652	0.425	0.660392	0.556818	0.574	0.692
resnetv2_50	resnetv2_50	in1k	224	0.28	S	25.55	S	Convolution	Conventional	1200000	0.792	0.676	0.28	0.401	0.11	0.367	0.463	0.9428	0.881	0.44521	0.431177	0.260462	0.504	0.535	0.8026	0.614	0.395276	0.646177	0.431818	0.522	0.65
resnext50d_32x4d	resnext50d_32x4d	in1k	224	0.28	S	25.05	S	Convolution	Conventional	1200000	0.791	0.676	0.278	0.4	0.104	0.365	0.461	0.9542	0.895	0.448751	0.43419	0.272954	0.513	0.538	0.8312	0.654	0.381299	0.625816	0.454545	0.529	0.636
gluon_resnext50_32x4d	gluon_resnext50_32x4d	in1k	224	0.28	S	25.03	S	Convolution	Conventional	1200000	0.785	0.669	0.268	0.393	0.09	0.355	0.452	0.9542	0.885	0.450915	0.448462	0.250468	0.509	0.533	0.8194	0.654	0.404921	0.660776	0.5	0.555	0.677
resnetblur50	resnetblur50	in1k	224	0.28	S	25.56	S	Convolution	Conventional	1200000	0.782	0.666	0.264	0.387	0.083	0.35	0.448	0.9492	0.893	0.479245	0.446876	0.269207	0.522	0.55	0.818	0.658	0.409843	0.6335	0.534091	0.559	0.683
dla102x	dla102x	in1k	224	0.28	S	26.31	S	Convolution	Conventional	1200000	0.781	0.666	0.263	0.387	0.082	0.35	0.448	0.9472	0.897	0.454849	0.425944	0.26421	0.511	0.539	0.8202	0.646	0.407087	0.659624	0.511364	0.556	0.678
gluon_resnet50_v1d	gluon_resnet50_v1d	in1k	224	0.28	S	25.58	S	Convolution	Conventional	1200000	0.78	0.664	0.262	0.386	0.079	0.348	0.446	0.9528	0.886	0.468818	0.442277	0.241724	0.51	0.535	0.8258	0.668	0.402953	0.650788	0.511364	0.558	0.676
densenet161	densenet161	in1k	224	0.28	S	28.68	S	Convolution	Conventional	1200000	0.771	0.653	0.286	0.402	0.042	0.346	0.449	0.9416	0.878	0.460752	0.426419	0.229232	0.499	0.53	0.8092	0.654	0.420079	0.675375	0.488636	0.56	0.692
dla60_res2net	dla60_res2net	in1k	224	0.28	S	20.85	S	Convolution	Conventional	1200000	0.779	0.662	0.259	0.383	0.076	0.345	0.443	0.9458	0.887	0.441472	0.395814	0.242349	0.492	0.52	0.81	0.639	0.371654	0.61698	0.443182	0.518	0.64
gluon_resnet50_v1s	gluon_resnet50_v1s	in1k	224	0.28	S	25.68	S	Convolution	Conventional	1200000	0.777	0.661	0.258	0.38	0.072	0.343	0.441	0.9502	0.886	0.455833	0.430542	0.234853	0.502	0.528	0.814	0.654	0.395276	0.646562	0.579545	0.569	0.699
densenet201	densenet201	in1k	224	0.28	S	20.01	S	Convolution	Conventional	1200000	0.769	0.648	0.277	0.408	0.039	0.343	0.446	0.943	0.874	0.47531	0.431018	0.191755	0.493	0.523	0.798	0.625	0.397441	0.68229	0.420455	0.531	0.665
tf_efficientnet_cc_b0_8e	tf_efficientnet_cc_b0_8e.in1k	in1k	224	0.28	S	24.01	S	Convolution	Conventional	1200000	0.776	0.66	0.257	0.379	0.071	0.342	0.441	0.831	0.721	0.0409207	0.262766	0.169894	0.299	0.36	0.6696	0.475	0.0669291	0.379178	0.386364	0.327	0.488
skresnet34	skresnet34	in1k	224	0.28	S	22.28	S	Convolution	Conventional	1200000	0.773	0.655	0.253	0.371	0.065	0.336	0.435	0.9396	0.864	0.470785	0.425944	0.231106	0.498	0.53	0.7874	0.634	0.391929	0.659239	0.454545	0.535	0.679
resnet34d	resnet34d	in1k	224	0.28	S	21.82	S	Convolution	Conventional	1200000	0.772	0.654	0.253	0.371	0.064	0.336	0.435	0.9402	0.878	0.481015	0.428005	0.207995	0.499	0.531	0.8016	0.637	0.403346	0.654245	0.477273	0.543	0.677
resnext50_32x4d	resnext50_32x4d	in1k	224	0.28	S	25.03	S	Convolution	Conventional	1200000	0.776	0.658	0.255	0.377	0.048	0.335	0.432	0.9614	0.905	0.452489	0.428164	0.341661	0.532	0.553	0.8382	0.673	0.406693	0.627737	0.545455	0.563	0.672
legacy_seresnet50	legacy_seresnet50	in1k	224	0.28	S	28.09	S	Convolution	Conventional	1200000	0.771	0.653	0.251	0.37	0.062	0.334	0.433	0.9414	0.877	0.383435	0.395972	0.239225	0.474	0.504	0.8004	0.626	0.353543	0.603919	0.465909	0.512	0.64
res2next50	res2next50	in1k	224	0.28	S	24.67	S	Convolution	Conventional	1200000	0.768	0.647	0.246	0.366	0.056	0.329	0.428	0.9436	0.876	0.401338	0.388202	0.224859	0.473	0.501	0.8084	0.629	0.367913	0.579716	0.386364	0.491	0.607
res2net50_26w_4s	res2net50_26w_4s	in1k	224	0.28	S	25.7	S	Convolution	Conventional	1200000	0.765	0.643	0.24	0.361	0.052	0.324	0.424	0.9444	0.891	0.414912	0.393911	0.20737	0.477	0.505	0.809	0.644	0.37126	0.594698	0.409091	0.505	0.624
res2net50_14w_8s	res2net50_14w_8s	in1k	224	0.28	S	25.06	S	Convolution	Conventional	1200000	0.761	0.641	0.239	0.358	0.05	0.322	0.423	0.9448	0.876	0.411961	0.399461	0.213616	0.475	0.503	0.8098	0.642	0.376969	0.613907	0.420455	0.513	0.633
vit_small_patch16_224	vit_small_patch16_224.augreg_in1k	in1k	224	0.28	S	22.05	S	ViT	Conventional	14200000	0.76288	0.6349	0.195917	0.3504	0.0969333	0.32	0.419	0.9422	0.867	0.364155	0.381224	0.282948	0.474	0.503	0.7868	0.615	0.333465	0.605455	0.465909	0.505	0.642
gluon_resnet50_v1c	gluon_resnet50_v1c	in1k	224	0.28	S	25.58	S	Convolution	Conventional	1200000	0.759	0.636	0.237	0.356	0.049	0.32	0.422	0.9464	0.883	0.437537	0.422772	0.198626	0.485	0.512	0.8144	0.651	0.376378	0.597772	0.443182	0.517	0.635
tv_resnext50_32x4d	tv_resnext50_32x4d	in1k	224	0.28	S	25.03	S	Convolution	Conventional	1200000	0.756	0.634	0.235	0.355	0.048	0.318	0.421	0.945	0.883	0.409404	0.401998	0.204247	0.475	0.503	0.8034	0.648	0.374213	0.622743	0.477273	0.531	0.661
gluon_resnet50_v1b	gluon_resnet50_v1b	in1k	224	0.28	S	25.56	S	Convolution	Conventional	1200000	0.751	0.629	0.226	0.348	0.041	0.311	0.414	0.9438	0.878	0.452292	0.422455	0.191755	0.486	0.515	0.8122	0.638	0.396457	0.629274	0.409091	0.518	0.638
resnet50	resnet50	in1k	224	0.28	S	25.56	S	Convolution	Conventional	1200000	0.761	0.632	0.241	0.362	0	0.309	0.406	0.956	0.889	0.437	0.412	0.28	0.505	0.528	0.8282	0.657	0.385	0.621	0.443	0.527	0.636
repvgg_a2	repvgg_a2	in1k	224	0.28	S	28.21	S	Convolution	Conventional	1200000	0.75	0.628	0.224	0.346	0.039	0.309	0.412	0.9378	0.868	0.422979	0.408024	0.187383	0.472	0.503	0.7926	0.624	0.367126	0.640031	0.5	0.533	0.672
dla60	dla60	in1k	224	0.28	S	22.04	S	Convolution	Conventional	1200000	0.746	0.626	0.219	0.339	0.038	0.306	0.41	0.9428	0.865	0.439504	0.410561	0.185509	0.475	0.504	0.802	0.643	0.387402	0.636957	0.488636	0.539	0.672
resnet34	resnet34	in1k	224	0.28	S	21.8	S	Convolution	Conventional	1200000	0.733	0.609	0.235	0.361	0.019	0.306	0.417	0.9324	0.861	0.450128	0.408024	0.187383	0.477	0.512	0.7766	0.607	0.373031	0.622743	0.409091	0.503	0.648
res2net50_48w_2s	res2net50_48w_2s	in1k	224	0.28	S	25.29	S	Convolution	Conventional	1200000	0.742	0.623	0.217	0.336	0.036	0.303	0.408	0.9436	0.871	0.409994	0.38947	0.197377	0.467	0.495	0.8058	0.632	0.362008	0.593162	0.488636	0.519	0.644
legacy_seresnet34	legacy_seresnet34	in1k	224	0.28	S	21.96	S	Convolution	Conventional	1200000	0.74	0.619	0.216	0.335	0.033	0.301	0.407	0.9264	0.852	0.42711	0.391373	0.185509	0.464	0.501	0.7886	0.614	0.345866	0.604687	0.431818	0.499	0.633
gluon_resnet34_v1b	gluon_resnet34_v1b	in1k	224	0.28	S	21.8	S	Convolution	Conventional	1200000	0.724	0.599	0.205	0.325	0.027	0.289	0.399	0.9274	0.852	0.441472	0.398668	0.177389	0.467	0.504	0.7772	0.605	0.370669	0.630426	0.477273	0.521	0.67
tv_resnet34	tv_resnet34	in1k	224	0.28	S	21.8	S	Convolution	Conventional	1200000	0.697	0.57	0.173	0.286	0.019	0.262	0.376	0.9148	0.84	0.420224	0.38947	0.156777	0.452	0.494	0.7666	0.584	0.322638	0.603534	0.477273	0.497	0.648
tv_resnet50	tv_resnet50	in1k	224	0.28	S	25.56	S	Convolution	Conventional	1200000	0.579	0.449	0.11	0.217	0	0.194	0.335	0.9352	0.874	0.389337	0.384872	0.132417	0.445	0.476	0.7806	0.604	0.37126	0.626969	0.340909	0.486	0.623
